# Supplementary material
Source: PubMed Central journal article supplement (PMC4227570)
Supplement: jo501958d_si_001.pdf [file jo501958d_si_001.pdf]

## Supporting Information

### Regio- and Stereoselective Mono-Epoxidation of Dienes using Methyltrioxorhenium: Synthesis of Allylic Epoxides

Saroj Ranjan De, Ganesh Kumar, Jawahar L. Jat, Saritha Birudaraju, Biao Lu, Rajkumar Manne, Narender Puli, Adeniyi Michael Adebesein, and John R. Falck\*

*Division of Chemistry, Department of Biochemistry, University of Texas Southwestern Medical Center, Dallas, Texas 75390*

#### Table of Contents

|                                                             |         |
|-------------------------------------------------------------|---------|
| <sup>1</sup> H/ <sup>13</sup> C NMR spectra of <b>1</b>     | S4      |
| <sup>1</sup> H/ <sup>13</sup> C NMR spectra of <b>2/3</b>   | S5-S6   |
| HPLC chromatogram of <b>2/3</b>                             | S7      |
| HPLC of diastereo-enriched <b>2</b>                         | S8      |
| <sup>1</sup> H NMR spectra of <b>4a</b>                     | S9      |
| <sup>1</sup> H NMR spectra of <b>5a/6a</b>                  | S10     |
| <sup>1</sup> H/ <sup>13</sup> C NMR spectra of <b>4b</b>    | S11-S12 |
| <sup>1</sup> H/ <sup>13</sup> C NMR spectra of <b>5b/6b</b> | S13-S14 |
| <sup>1</sup> H NMR spectra of <b>4c</b>                     | S15     |
| <sup>1</sup> H/ <sup>13</sup> C NMR spectra of <b>5c/6c</b> | S16-S17 |
| <sup>1</sup> H/ <sup>13</sup> C NMR spectra of <b>4d</b>    | S18-S19 |
| <sup>1</sup> H/ <sup>13</sup> C NMR spectra of <b>5d/6d</b> | S20-S21 |
| <sup>1</sup> H/ <sup>13</sup> C NMR spectra of <b>4e</b>    | S22-S23 |
| <sup>1</sup> H/ <sup>13</sup> C NMR spectra of <b>5e/6e</b> | S24-S25 |

|                                                        |         |
|--------------------------------------------------------|---------|
| $^1\text{H}/^{13}\text{C}$ NMR spectra of <b>5f/6f</b> | S26-S27 |
| $^1\text{H}/^{13}\text{C}$ NMR spectra of <b>7</b>     | S28-S29 |
| $^1\text{H}/^{13}\text{C}$ NMR spectra of <b>8</b>     | S30-S31 |
| $^1\text{H}/^{13}\text{C}$ NMR spectra of <b>9</b>     | S32-S33 |
| $^1\text{H}/^{13}\text{C}$ NMR spectra of <b>10</b>    | S34-S35 |
| $^1\text{H}$ NMR spectra of <b>12/13</b>               | S36     |
| $^1\text{H}/^{13}\text{C}$ NMR spectra of <b>15</b>    | S37-S38 |
| $^1\text{H}/^{13}\text{C}$ NMR spectra of <b>17</b>    | S39-S40 |
| $^1\text{H}/^{13}\text{C}$ NMR spectra of <b>19</b>    | S41-S42 |
| $^1\text{H}/^{13}\text{C}$ NMR spectra of <b>20</b>    | S43-S44 |
| $^1\text{H}/^{13}\text{C}$ NMR spectra of <b>21</b>    | S45-S46 |
| $^1\text{H}/^{13}\text{C}$ NMR spectra of <b>22</b>    | S49-S50 |
| $^1\text{H}/^{13}\text{C}$ NMR spectra of <b>23</b>    | S51-S52 |
| $^1\text{H}/^{13}\text{C}$ NMR spectra of <b>24</b>    | S55-S56 |
| $^1\text{H}/^{13}\text{C}$ NMR spectra of <b>25</b>    | S57-S58 |
| $^1\text{H}/^{13}\text{C}$ NMR spectra of <b>26</b>    | S59-S60 |
| $^1\text{H}/^{13}\text{C}$ NMR spectra of <b>27</b>    | S61-S62 |
| $^1\text{H}/^{13}\text{C}$ NMR spectra of <b>28</b>    | S63-S64 |
| $^1\text{H}/^{13}\text{C}$ NMR spectra of <b>29</b>    | S65-S66 |
| $^1\text{H}/^{13}\text{C}$ NMR spectra of <b>30</b>    | S67-S68 |
| $^1\text{H}/^{13}\text{C}$ NMR spectra of <b>31</b>    | S69-S70 |
| $^1\text{H}/^{13}\text{C}$ NMR spectra of <b>32</b>    | S71-S72 |

|                                                                                           |         |
|-------------------------------------------------------------------------------------------|---------|
| $^1\text{H}/^{13}\text{C}$ NMR spectra of <b>33</b>                                       | S73-S74 |
| $^1\text{H}/^{13}\text{C}$ NMR spectra of <b>34</b>                                       | S75-S76 |
| $^1\text{H}/^{13}\text{C}$ NMR spectra of <b>35</b>                                       | S77-S78 |
| $^1\text{H}/^{13}\text{C}$ NMR spectra of <b>36</b>                                       | S79-S80 |
| $^1\text{H}/^{13}\text{C}$ NMR spectra of <b>38</b>                                       | S81-S82 |
| $^1\text{H}/^{13}\text{C}$ NMR spectra of <b>40</b>                                       | S83-S84 |
| $^1\text{H}/^{13}\text{C}$ NMR spectra of <b>42</b>                                       | S85-S86 |
| HPLC chromatogram of standard chiral epoxide.                                             | S87     |
| HPLC chromatogram of chiral epoxide from chiral salan ligand and Ti(IV)                   | S88     |
| HPLC chromatogram of 1:1 mixture of chiral Ti(salan)-generated epoxide + epoxide standard | S89     |
| HPLC chromatogram of epoxide 5a/6a from MTO-pyridine epoxidation                          | S90     |
| HPLC chromatogram of epoxide 5a/6a from MTO-pyridine epoxidation + epoxide standard       | S91     |

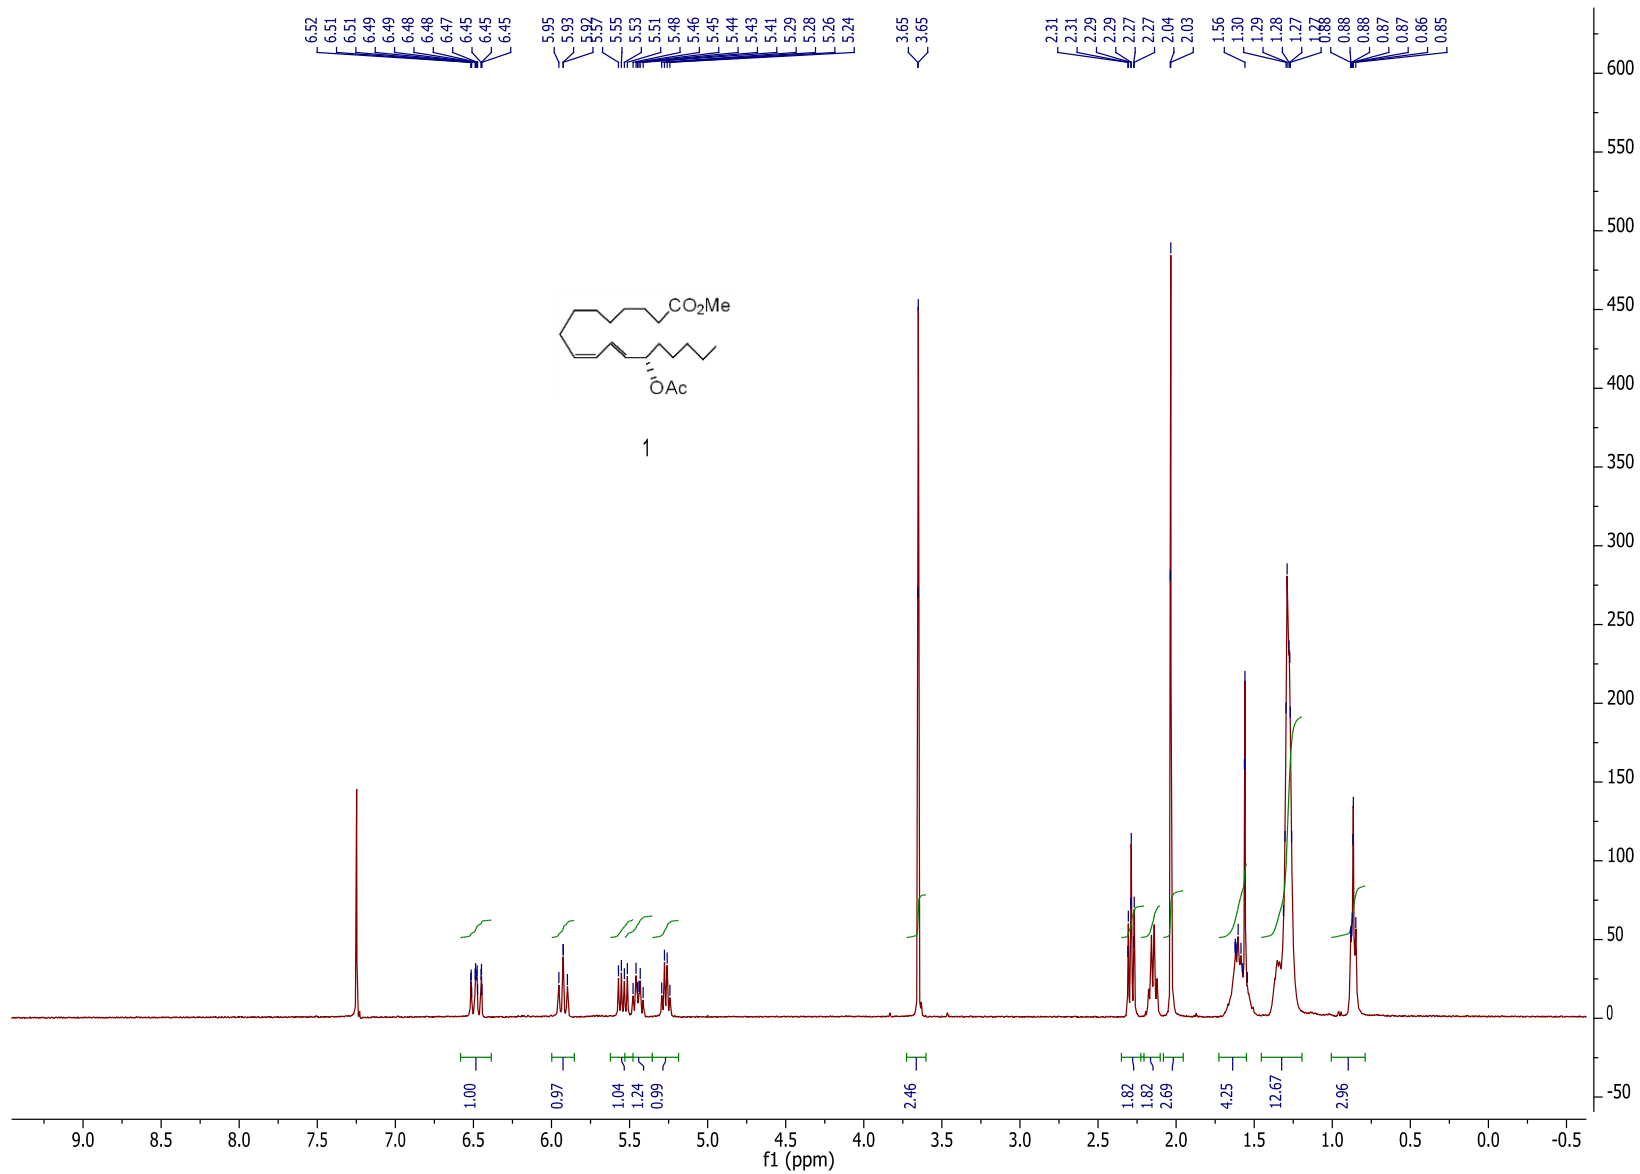

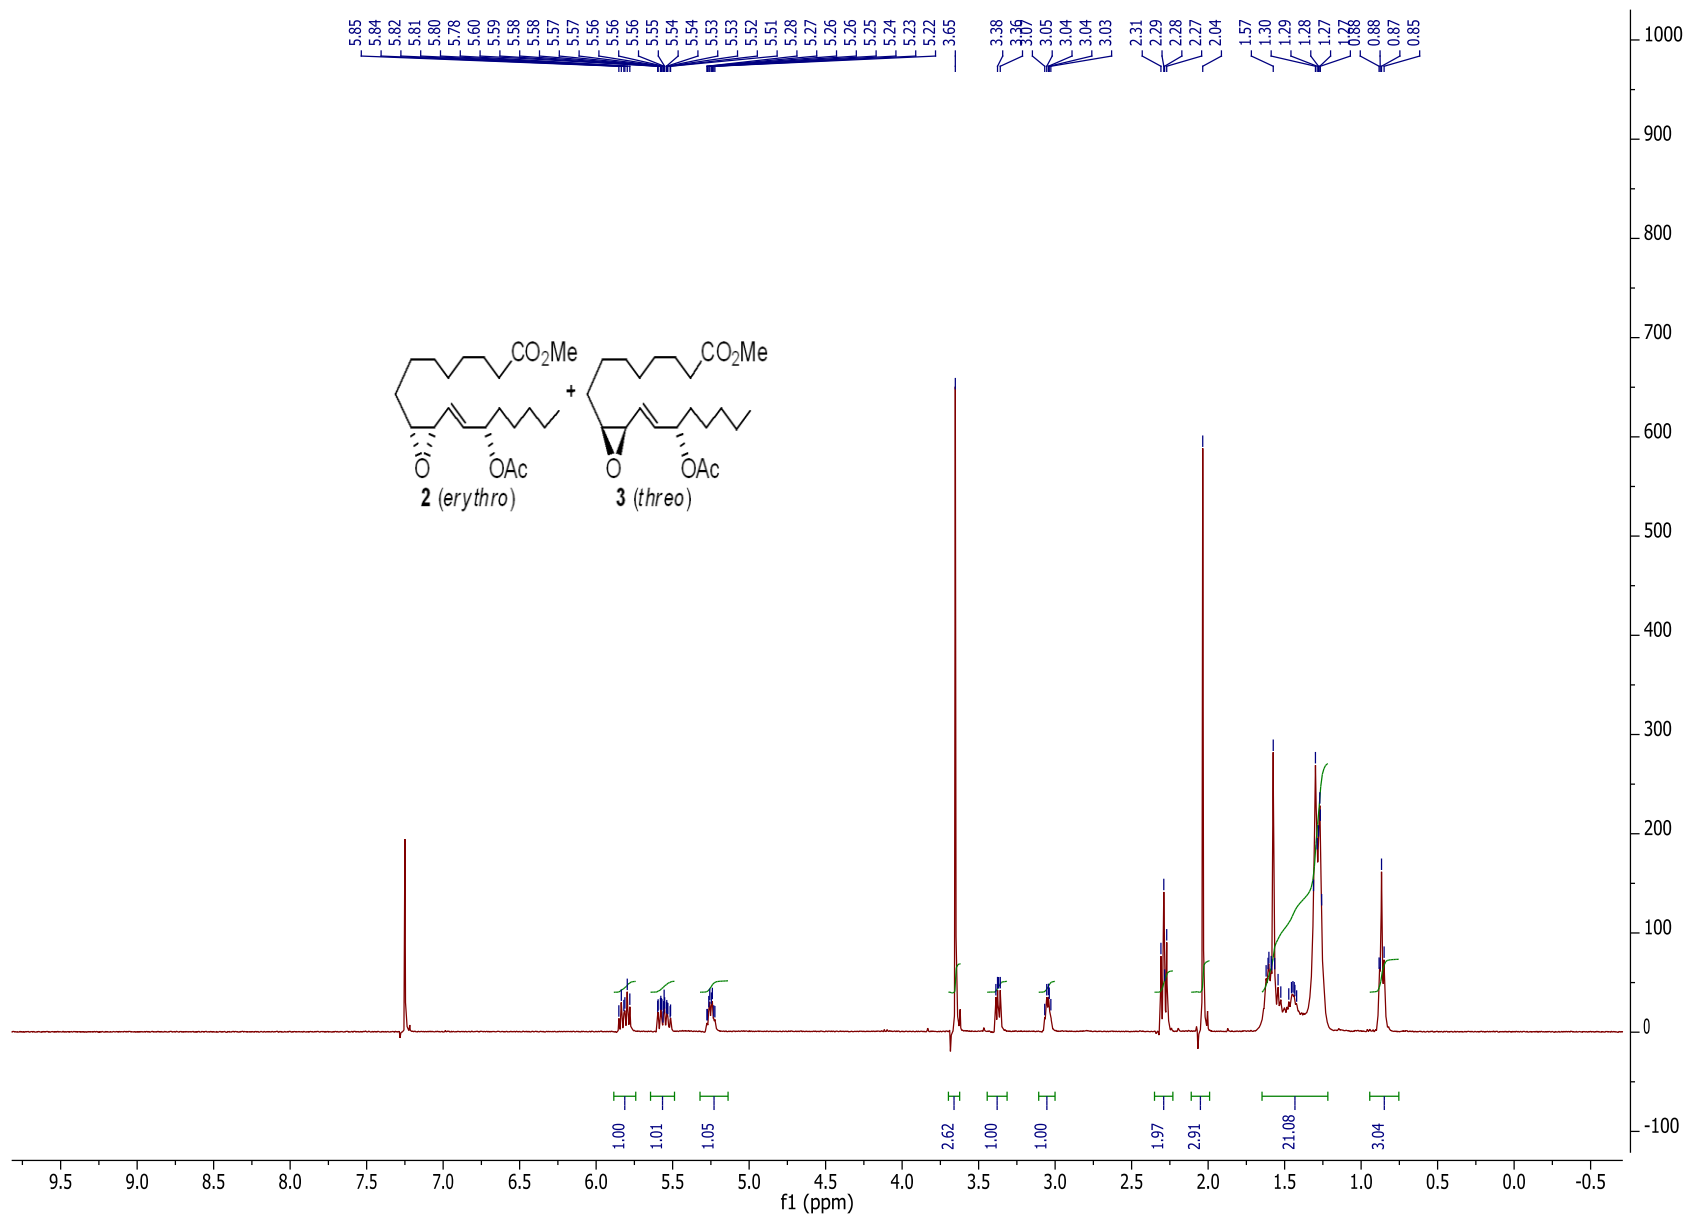

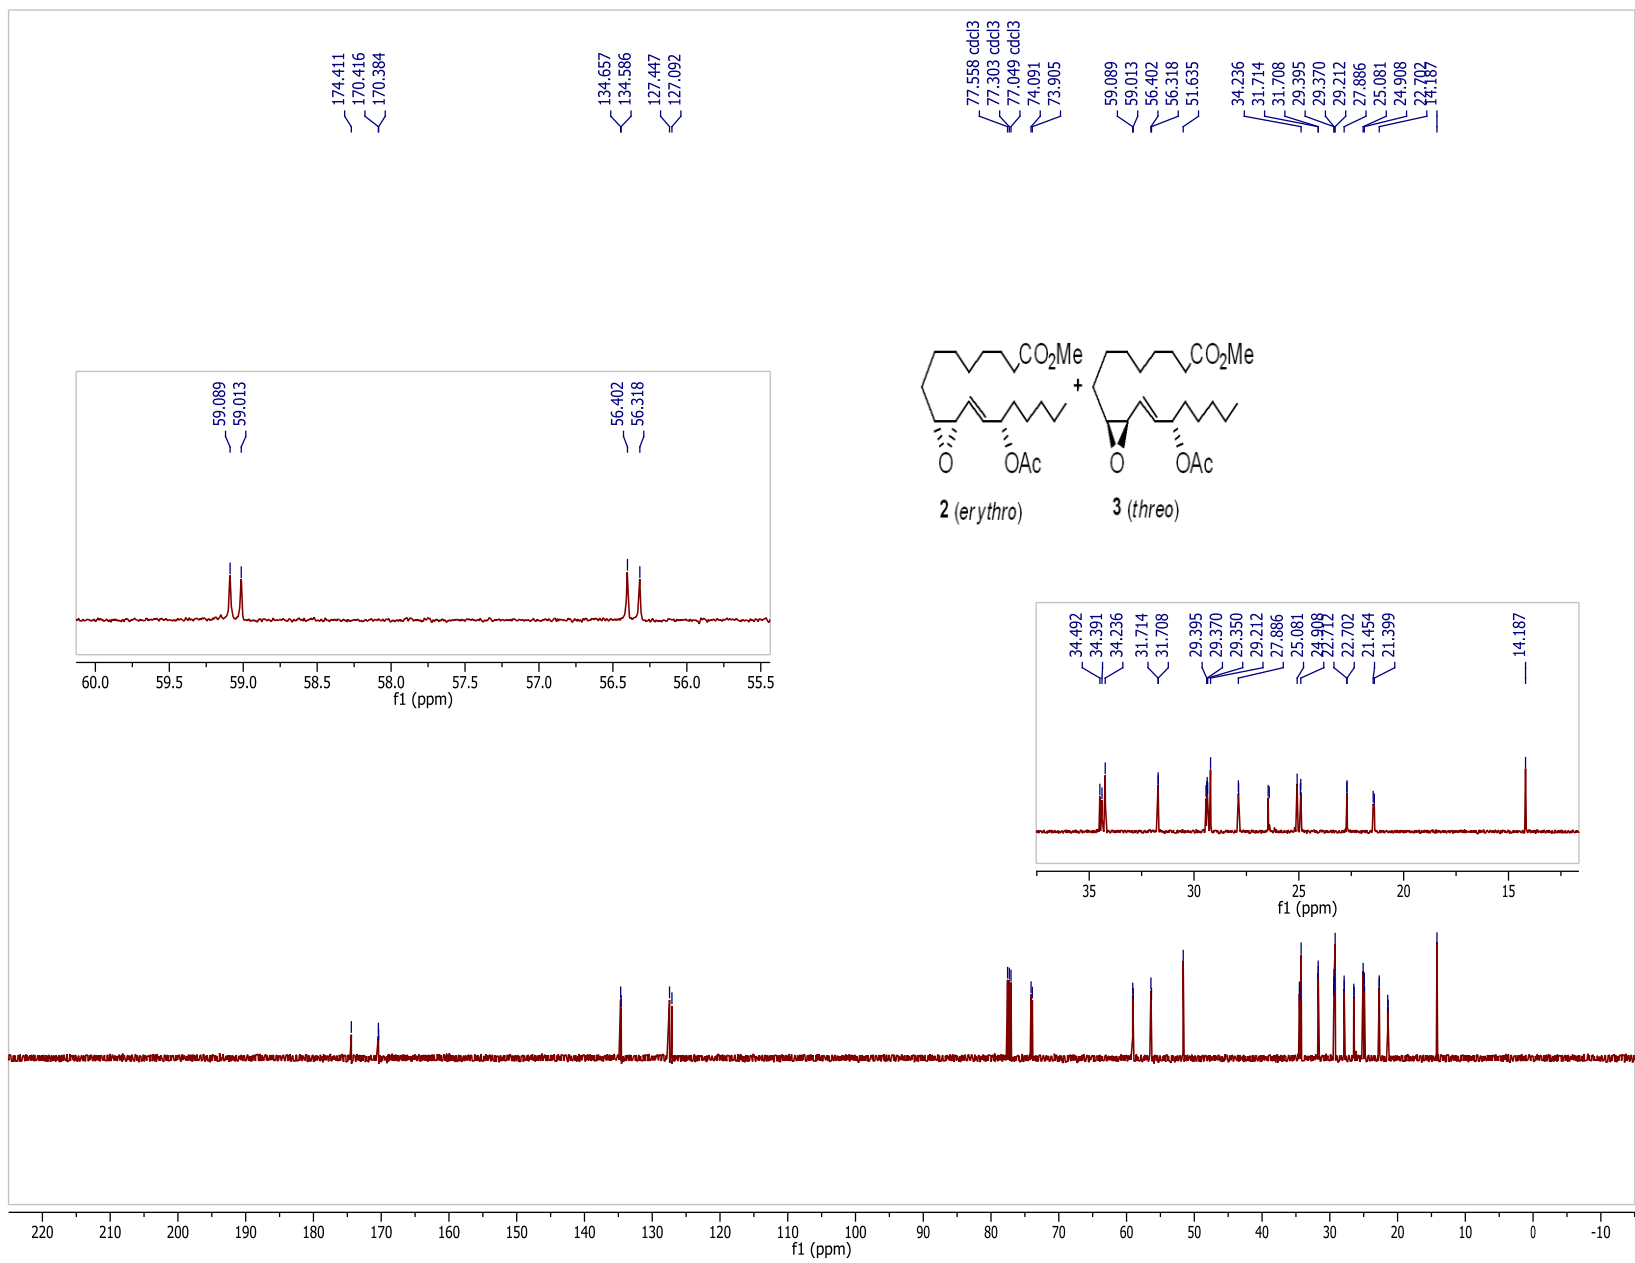

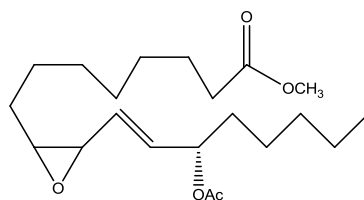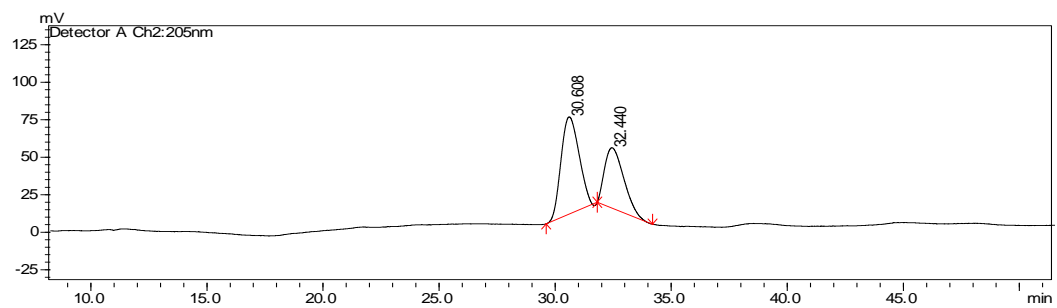

| Peak | Ret. Time | Area    | Height | Area % |
|------|-----------|---------|--------|--------|
| 1.   | 30.608    | 3568595 | 65420  | 58.429 |
| 2.   | 32.440    | 2539018 | 42270  | 41.571 |

CHIRALCEL OJ-H, 15 CM, 4.6MM, 2.7 MICRON, Hexane:IPA (99.8:0.2), 0.8 mL/min, 205.

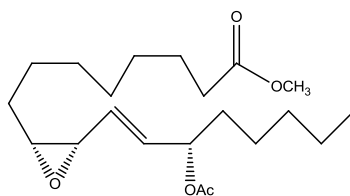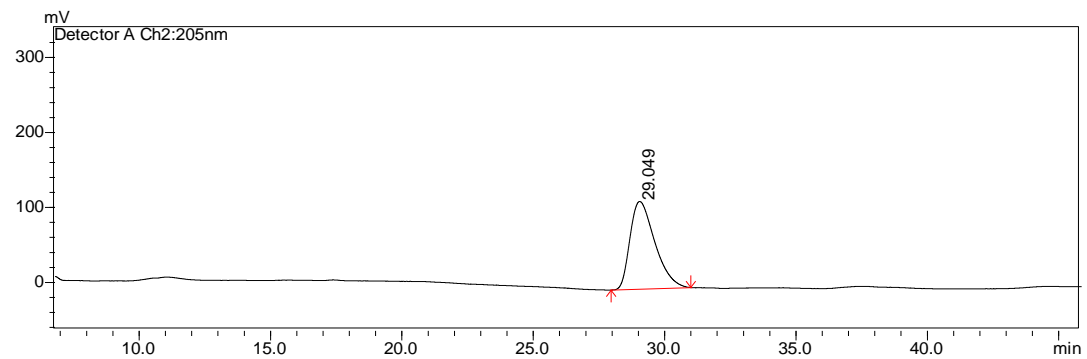

| Peak | Ret. Time | Area    | Height | Area % |
|------|-----------|---------|--------|--------|
| 1.   | 29.049    | 7725264 | 116942 | 100    |

CHIRALCEL OJ-H, 15 CM, 4.6MM, 2.7 MICRON, Hexane:IPA (99.8:0.2), 0.8 mL/min, 205.

Note: Compound obtained from chiral epoxidation as described in reference



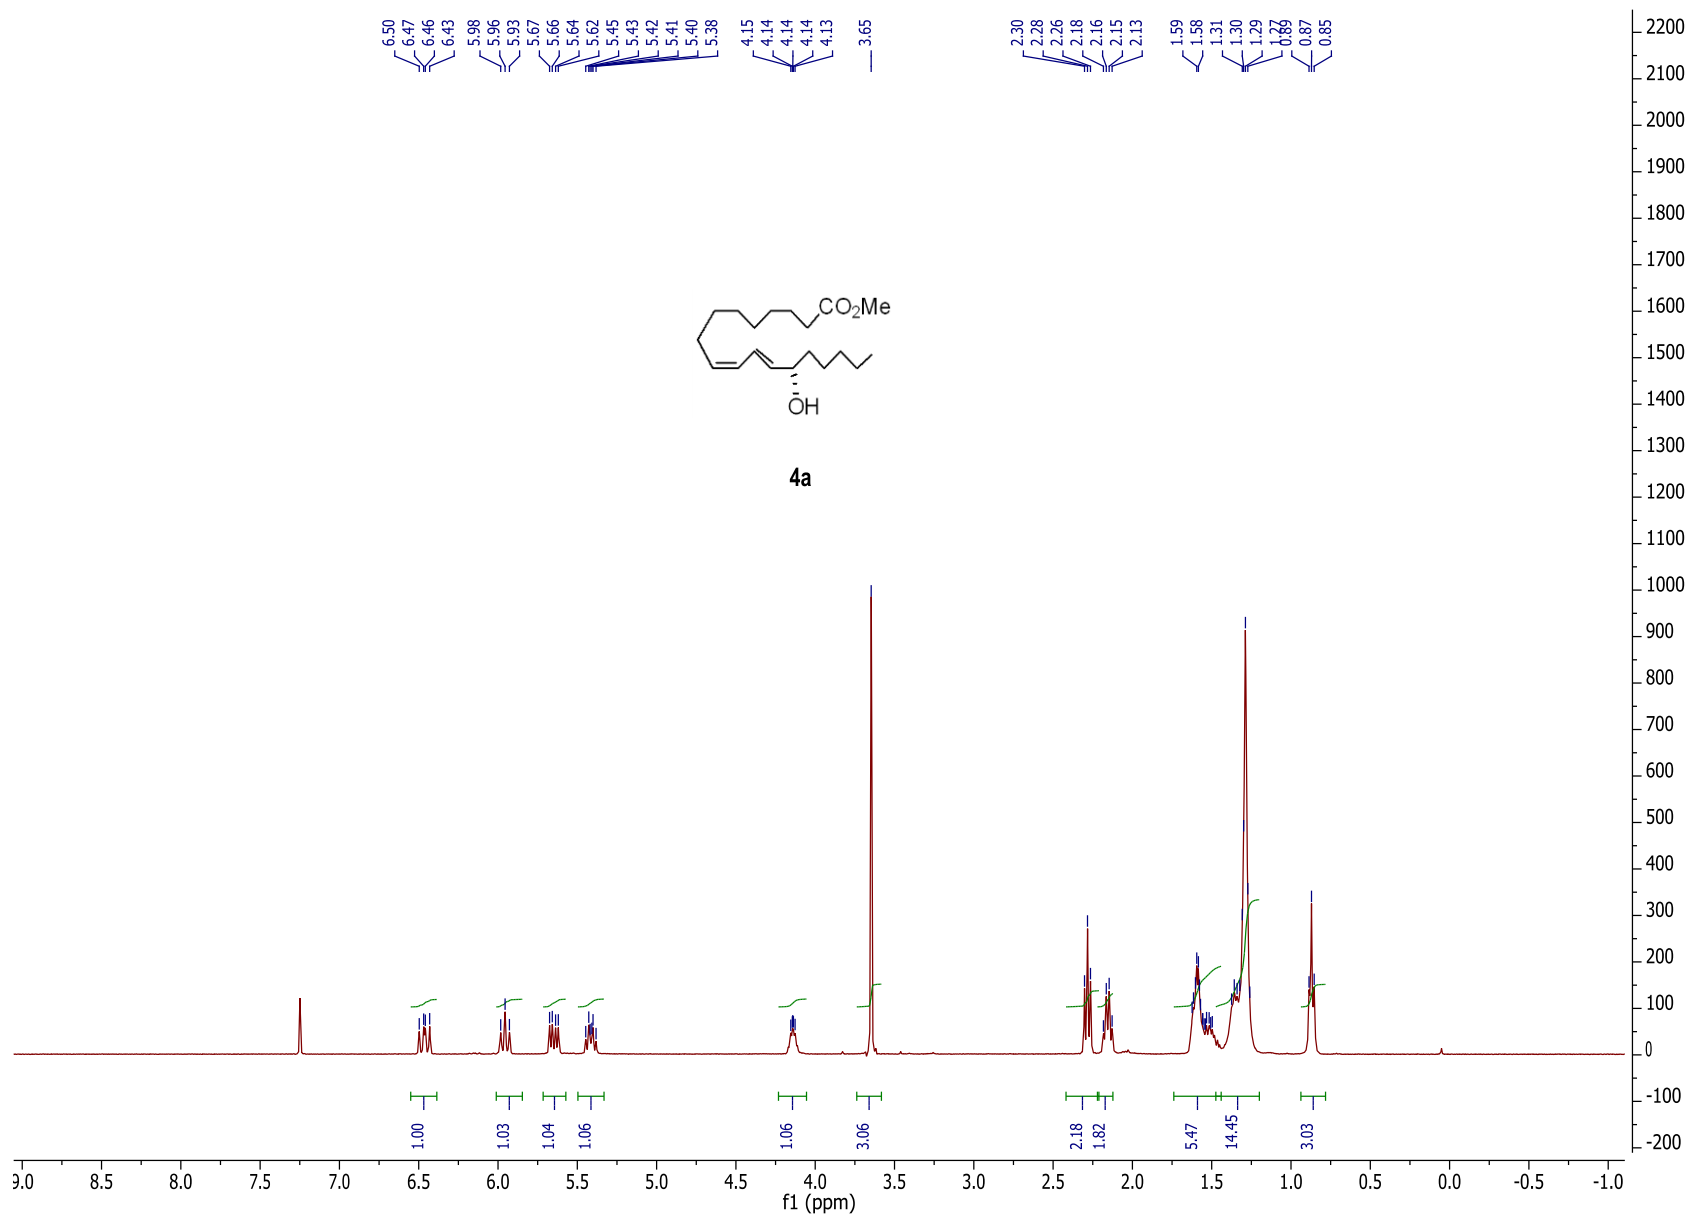

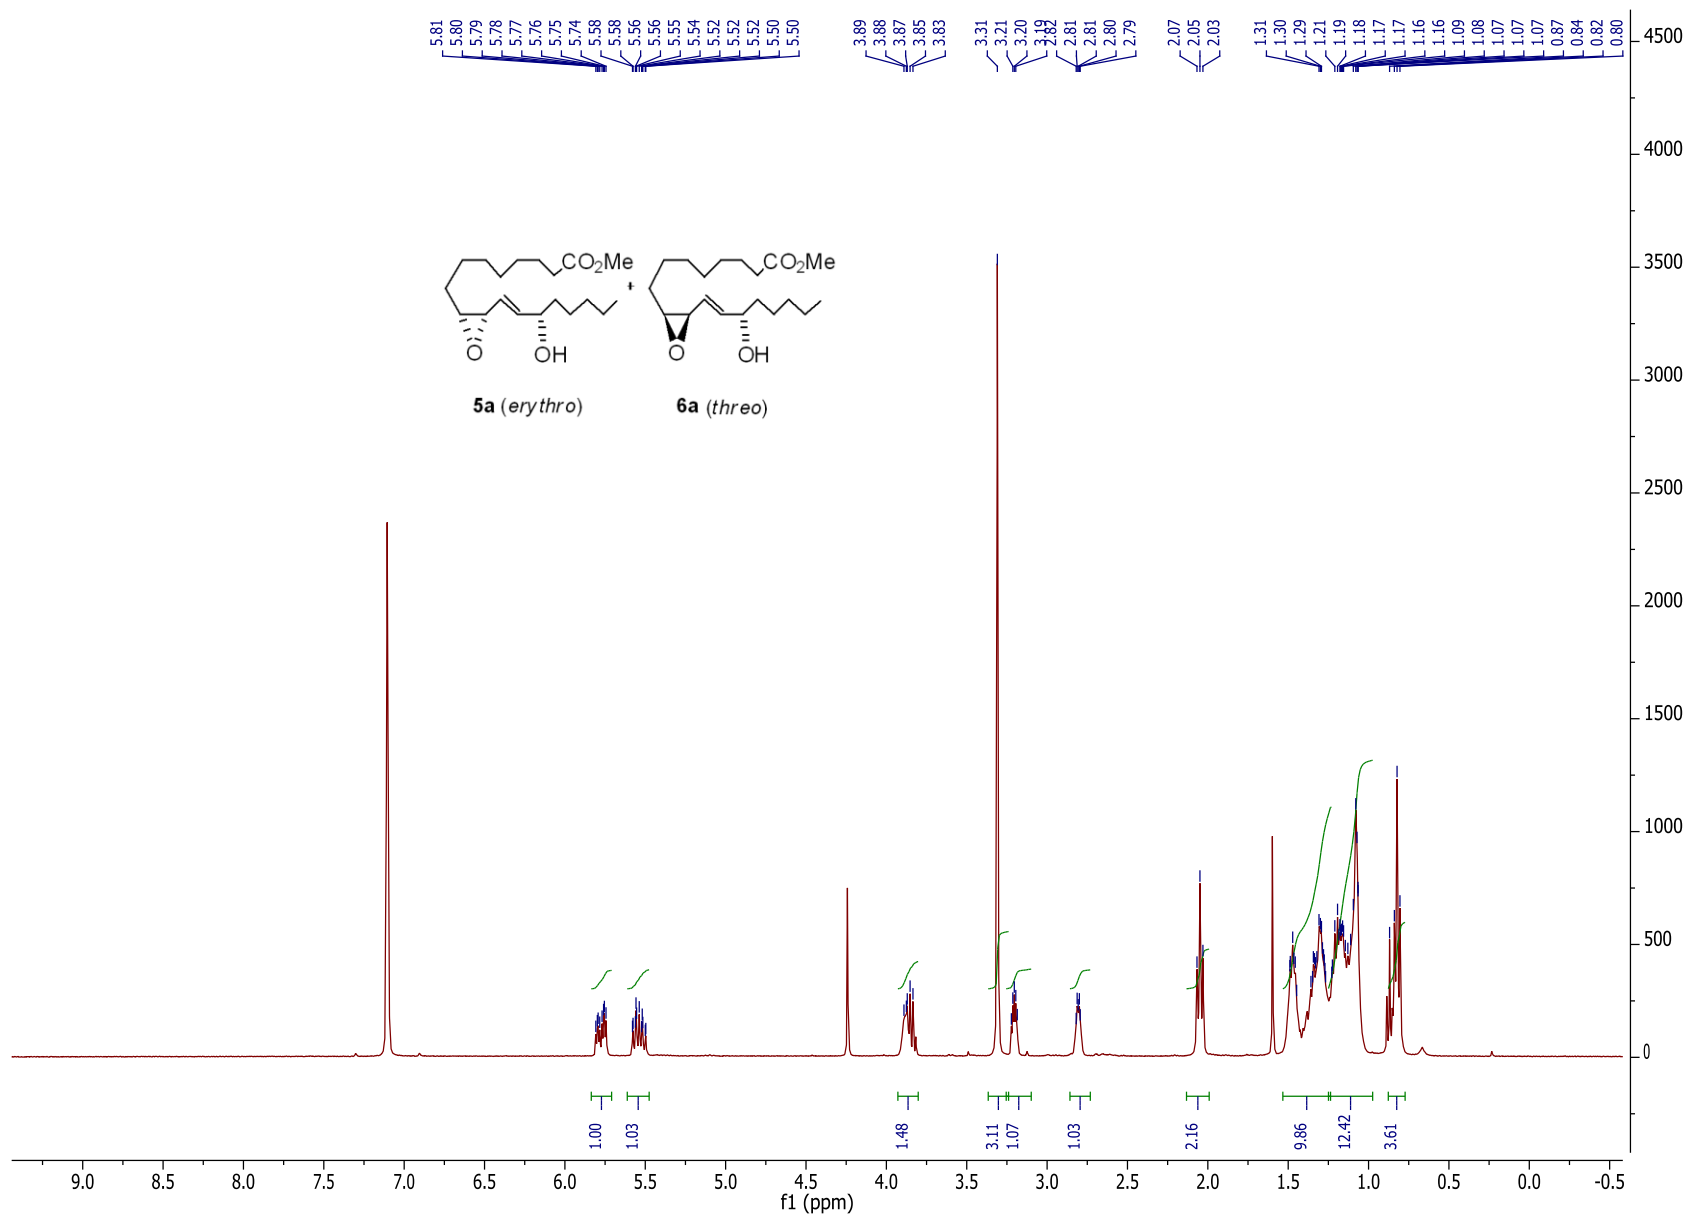

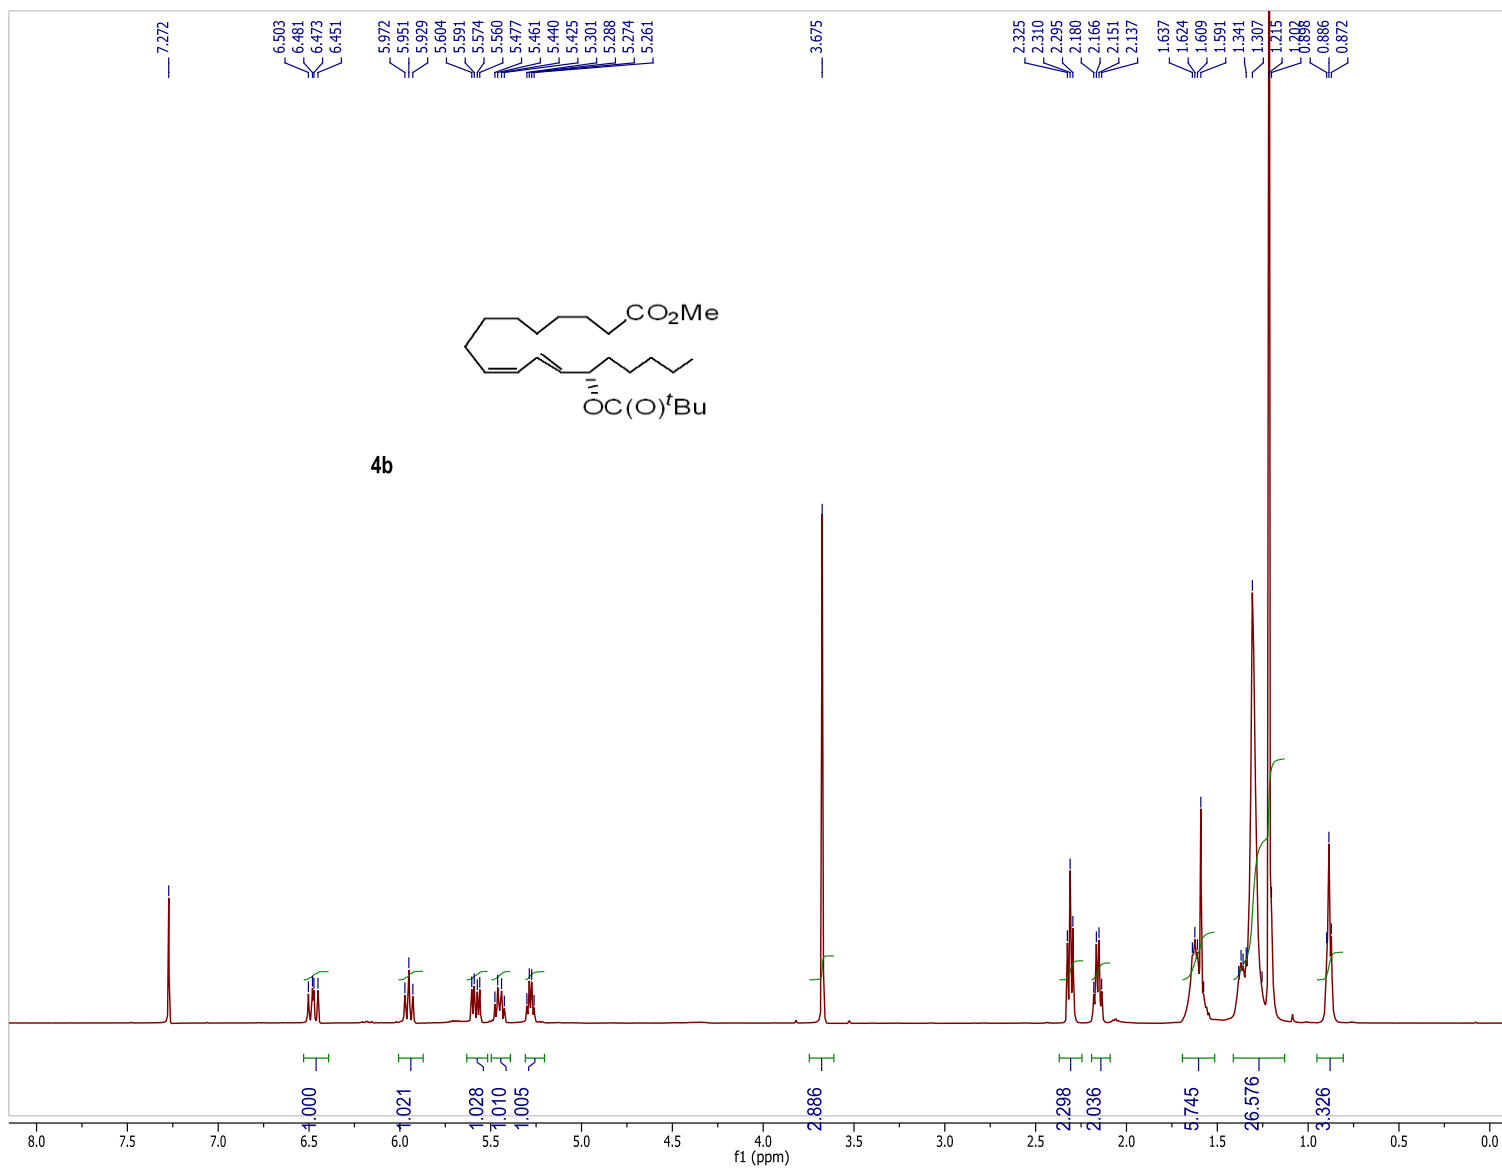

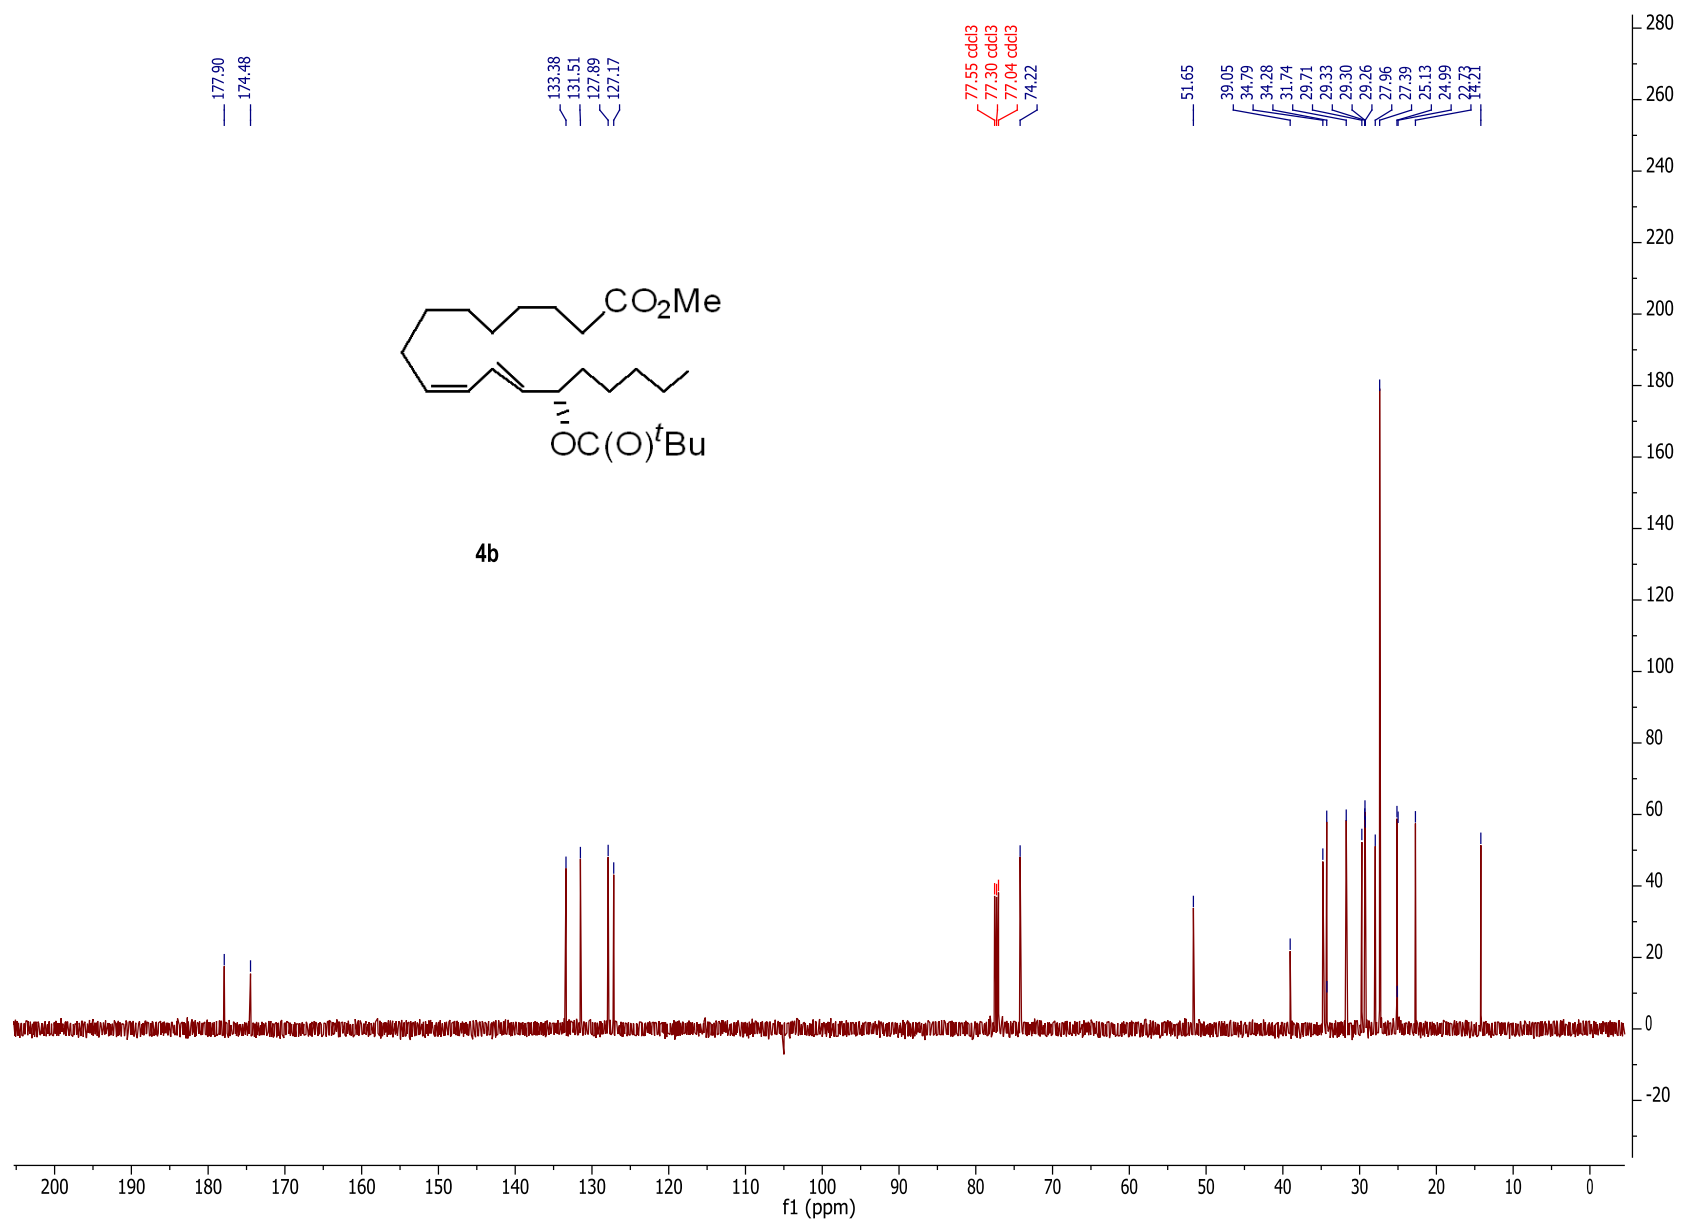

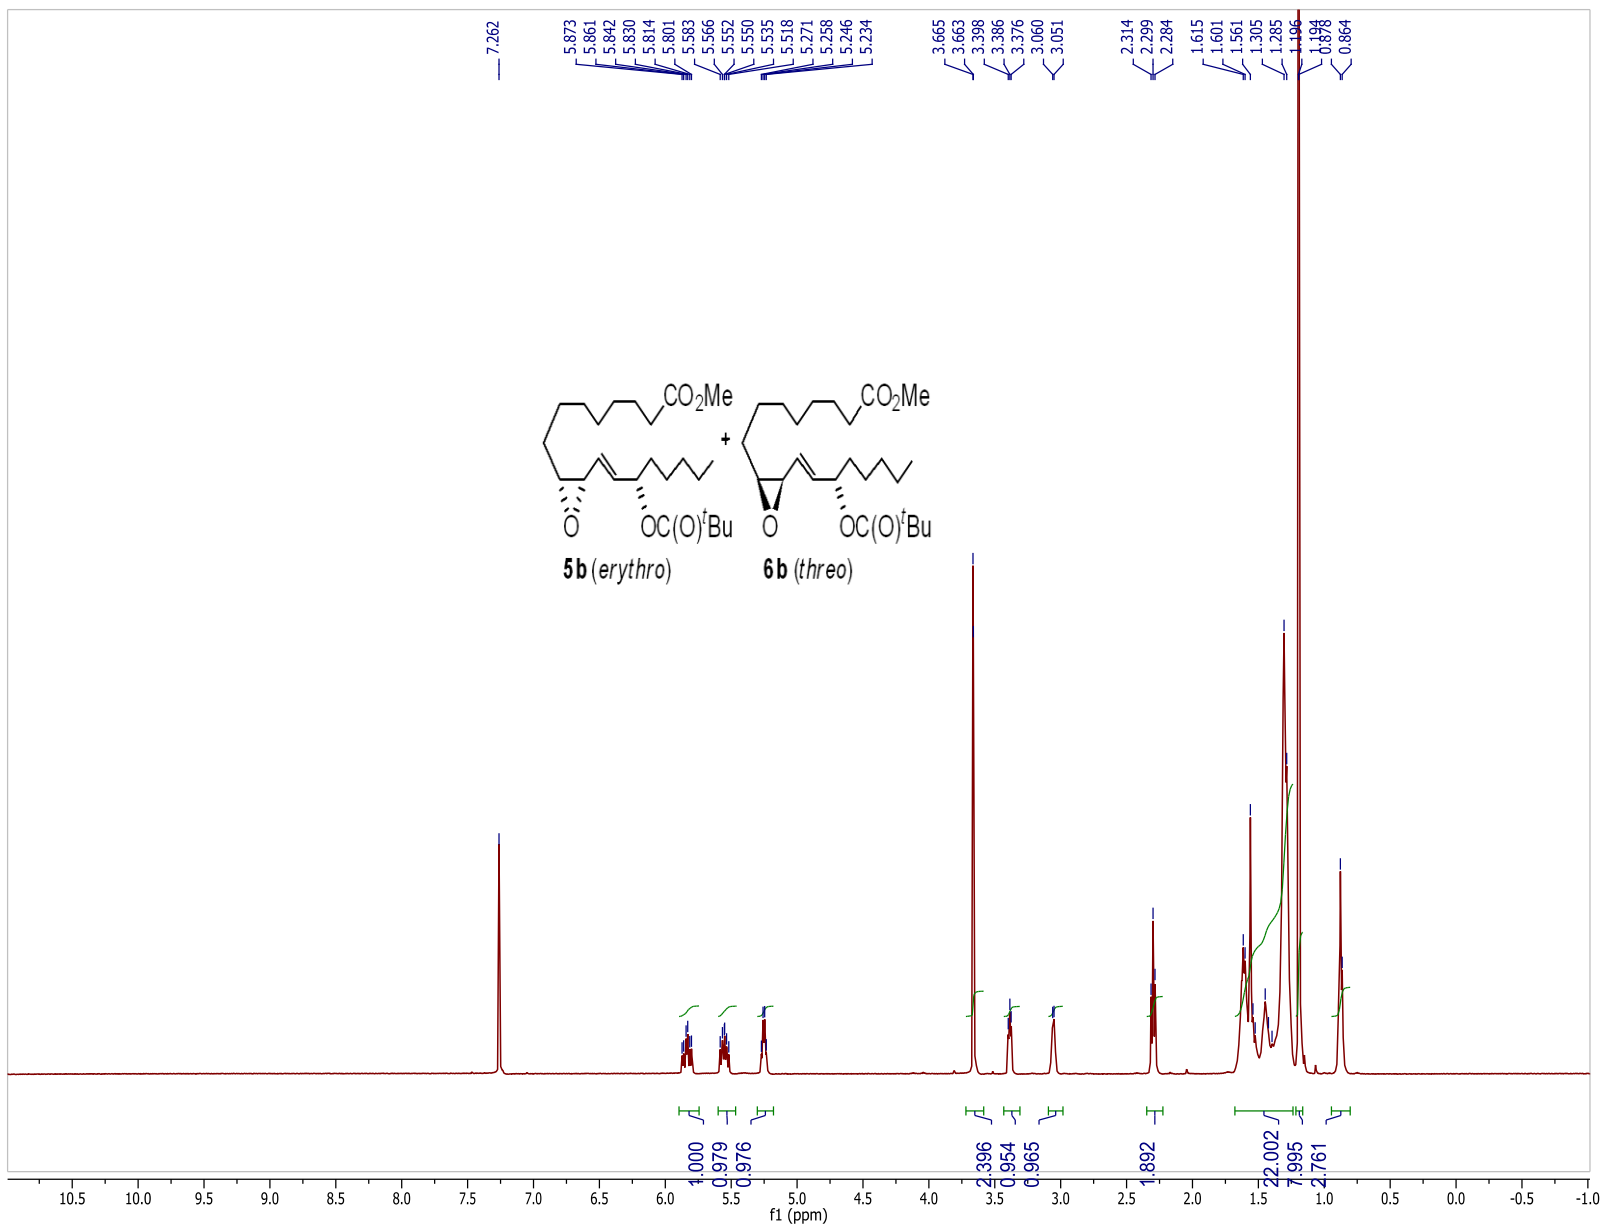

SR0-I-209-20

File: Carbon  
Pulse Sequence: s2pu1  
Solvent: cdCl3  
Temp. 25.0 C / 298.1 K  
Operator: falck  
INOVA-500 "fire2.swmed.edu"

Relax. delay 1.000 sec  
Pulse 45.0 degrees  
Acq. time 1.300 sec  
Width 30165.9 Hz  
224 repetitions  
OBSERVE C13, 125.6692167 MHz  
DECOUPLE H1, 499.7803743 MHz  
Power 36 dB  
continuously on  
WALTZ-16 modulated  
DATA PROCESSING  
Line broadening 0.5 Hz  
FT size 131072  
Total time 6 hr, 24 min, 53 sec

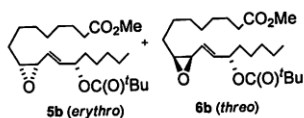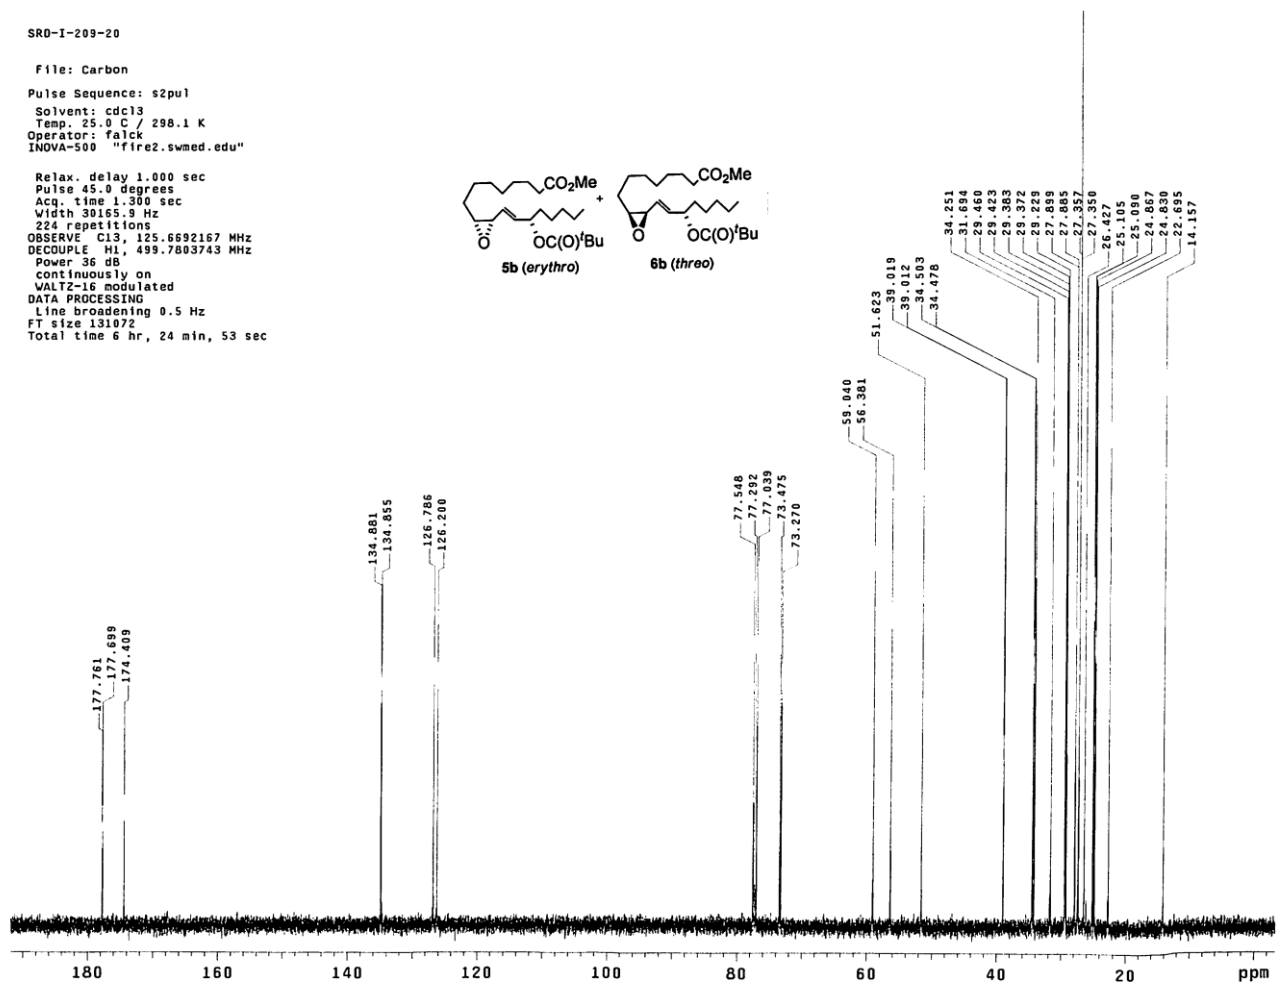

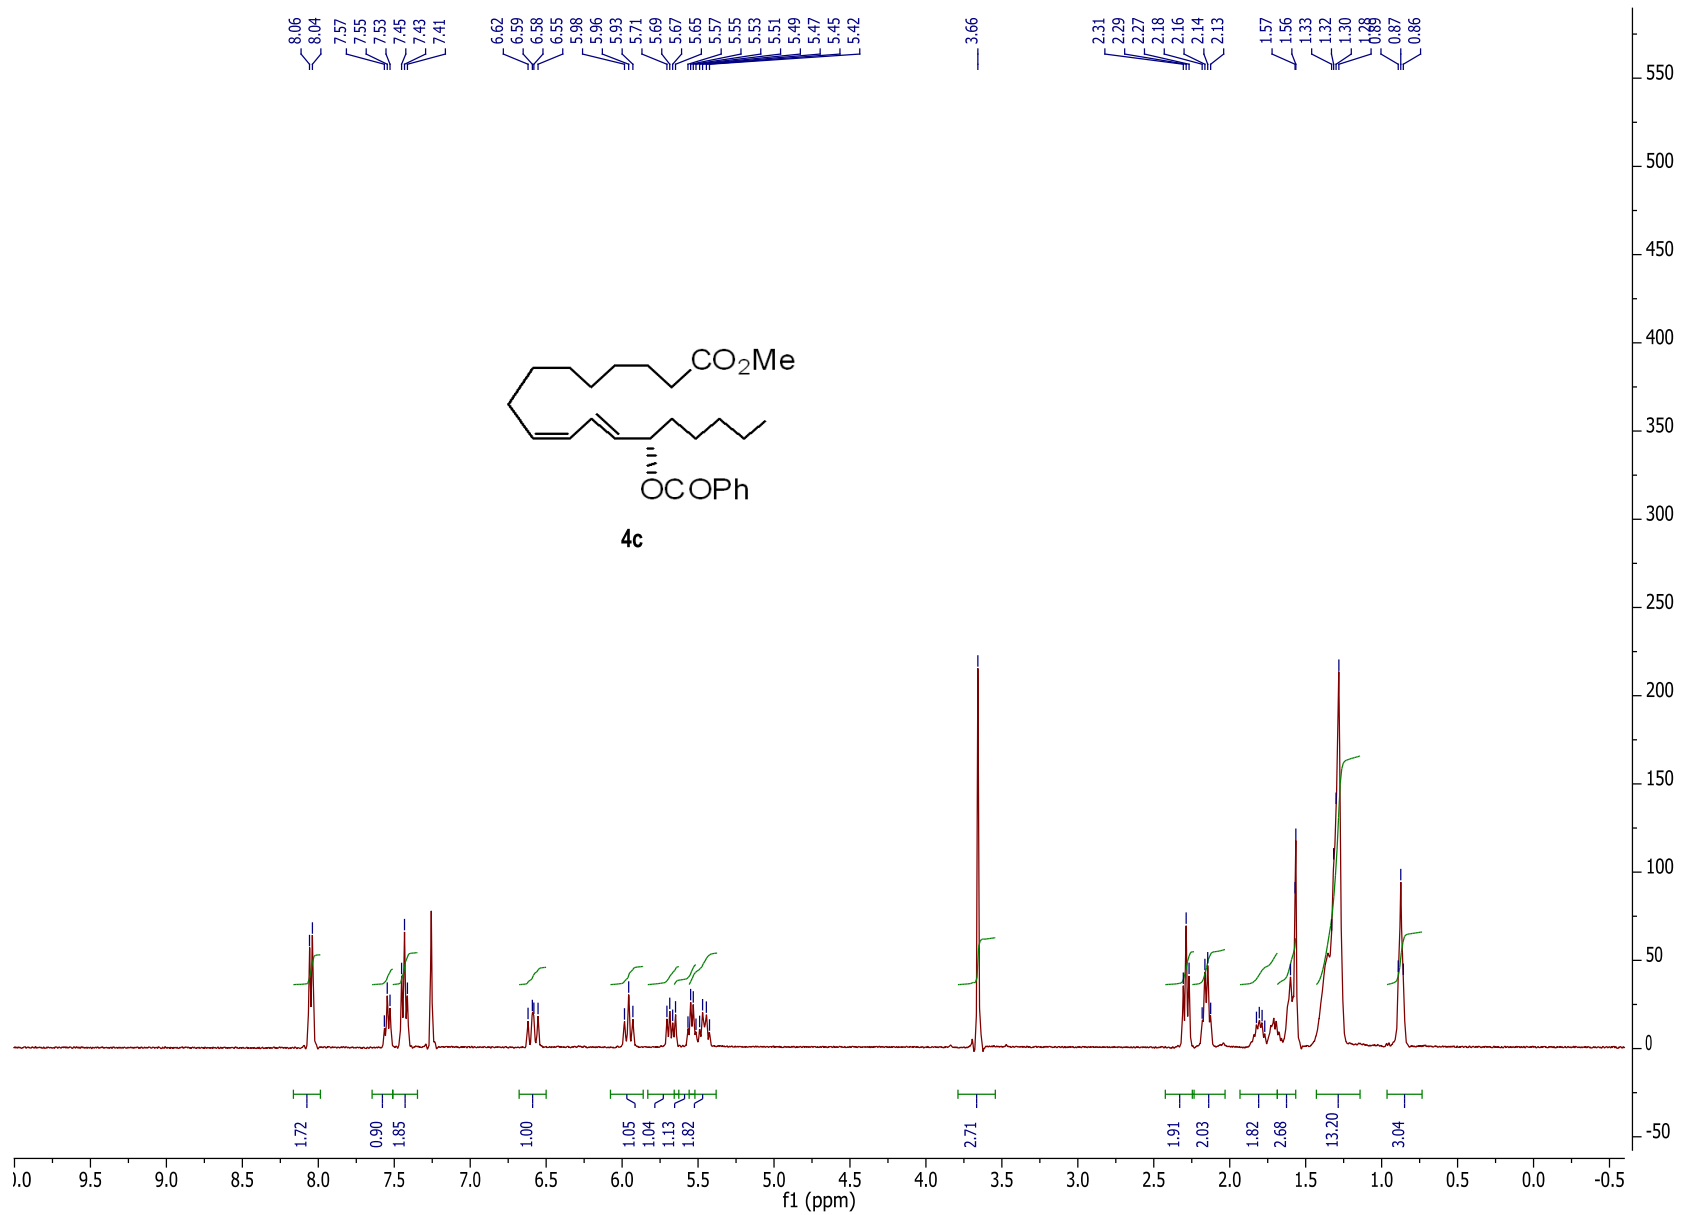

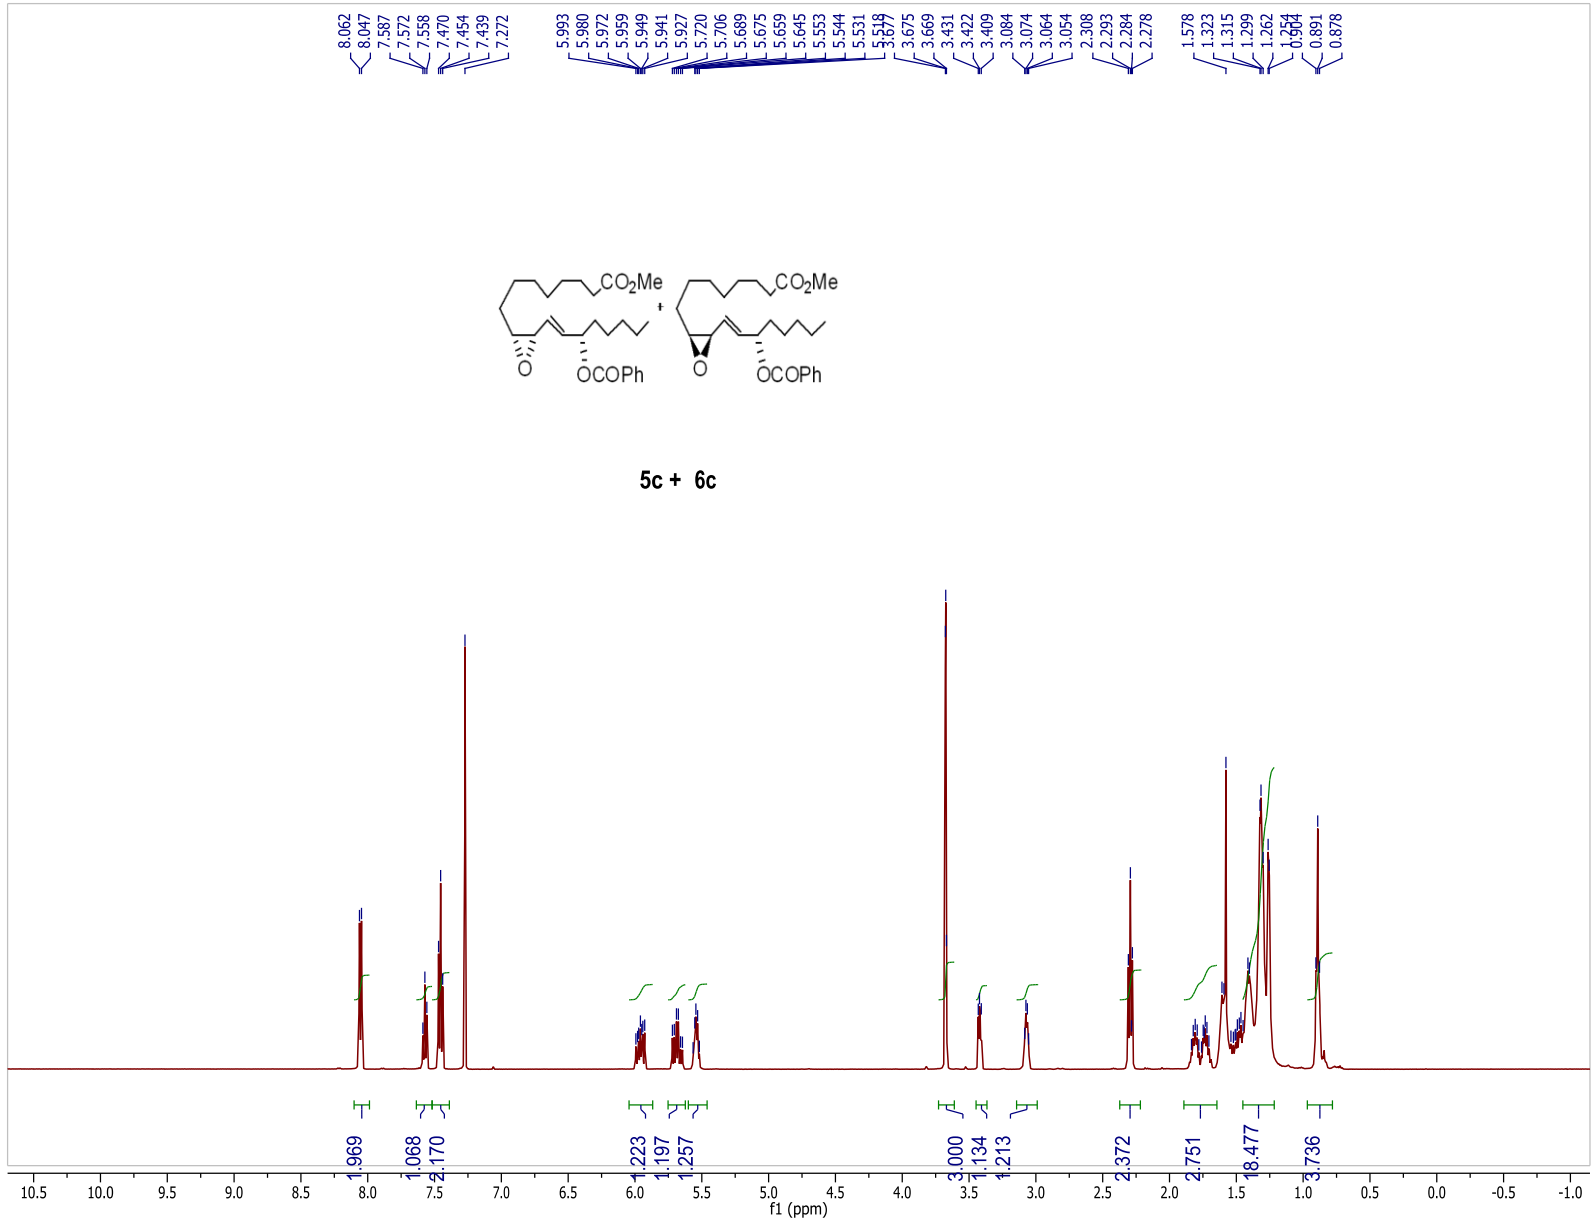



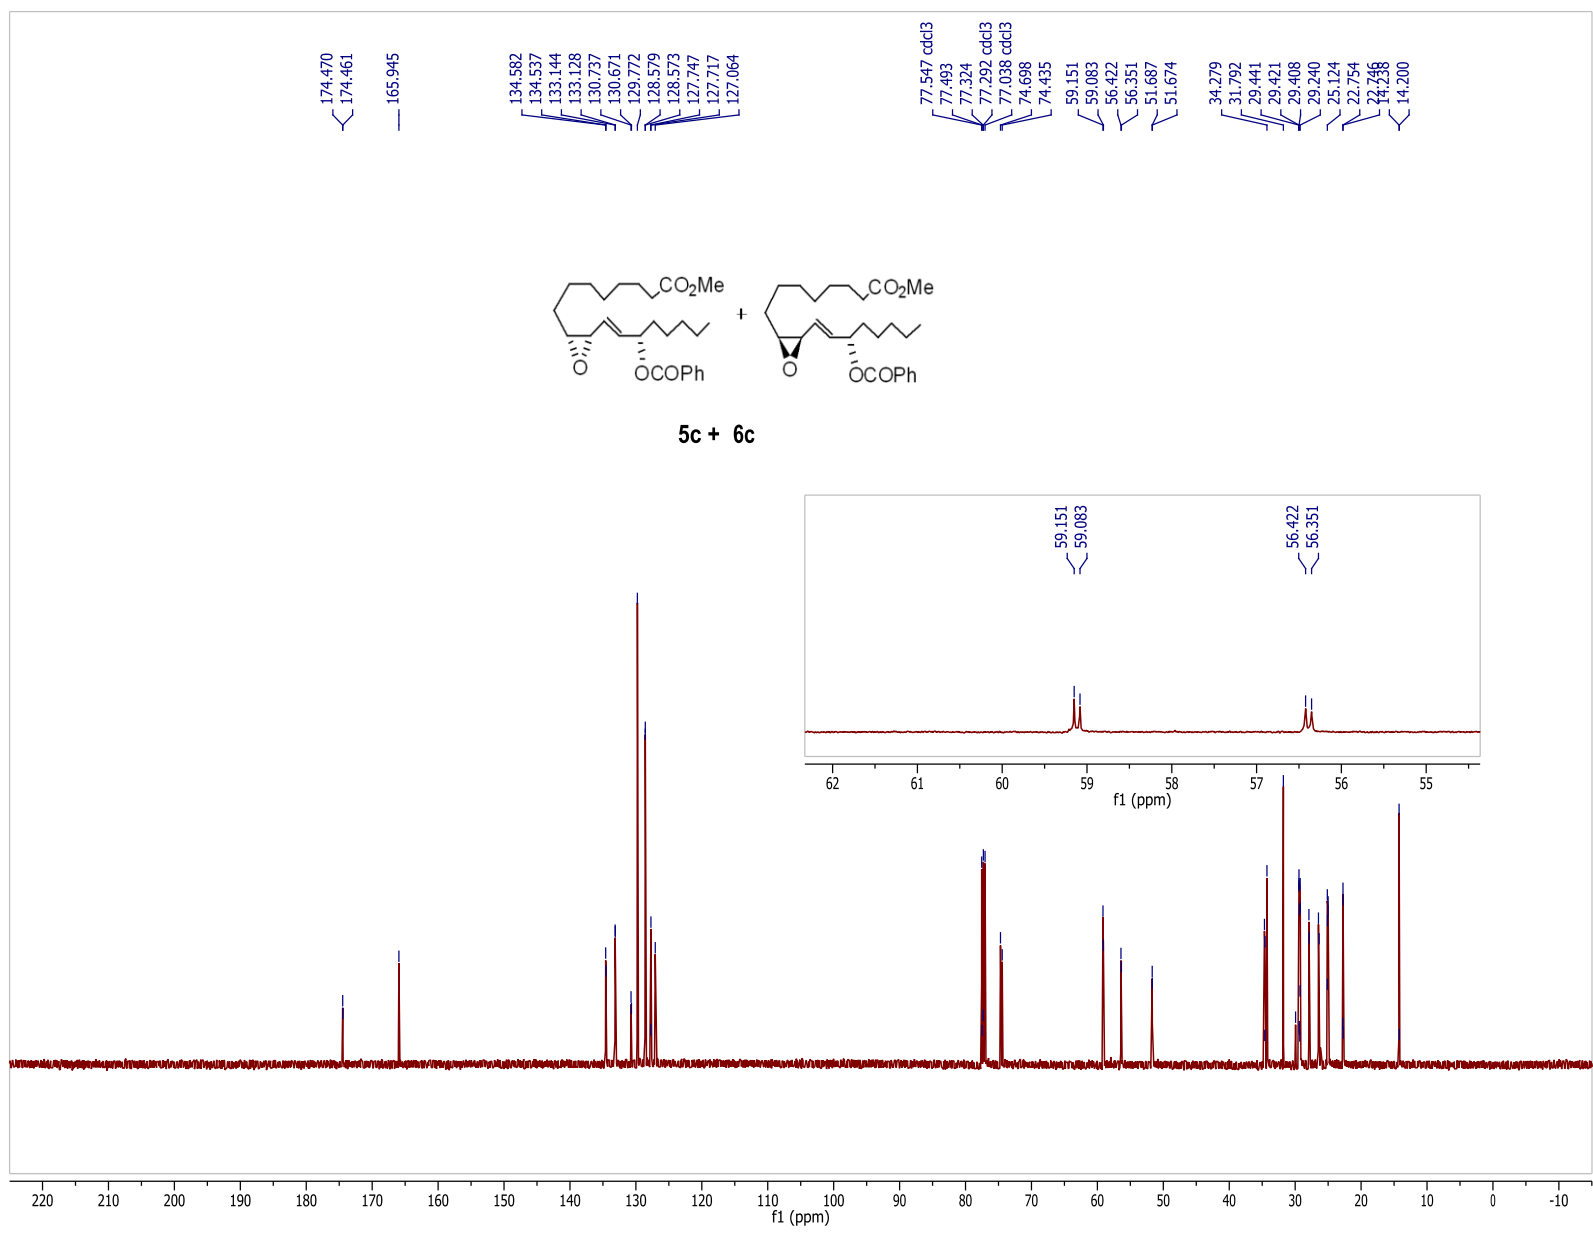

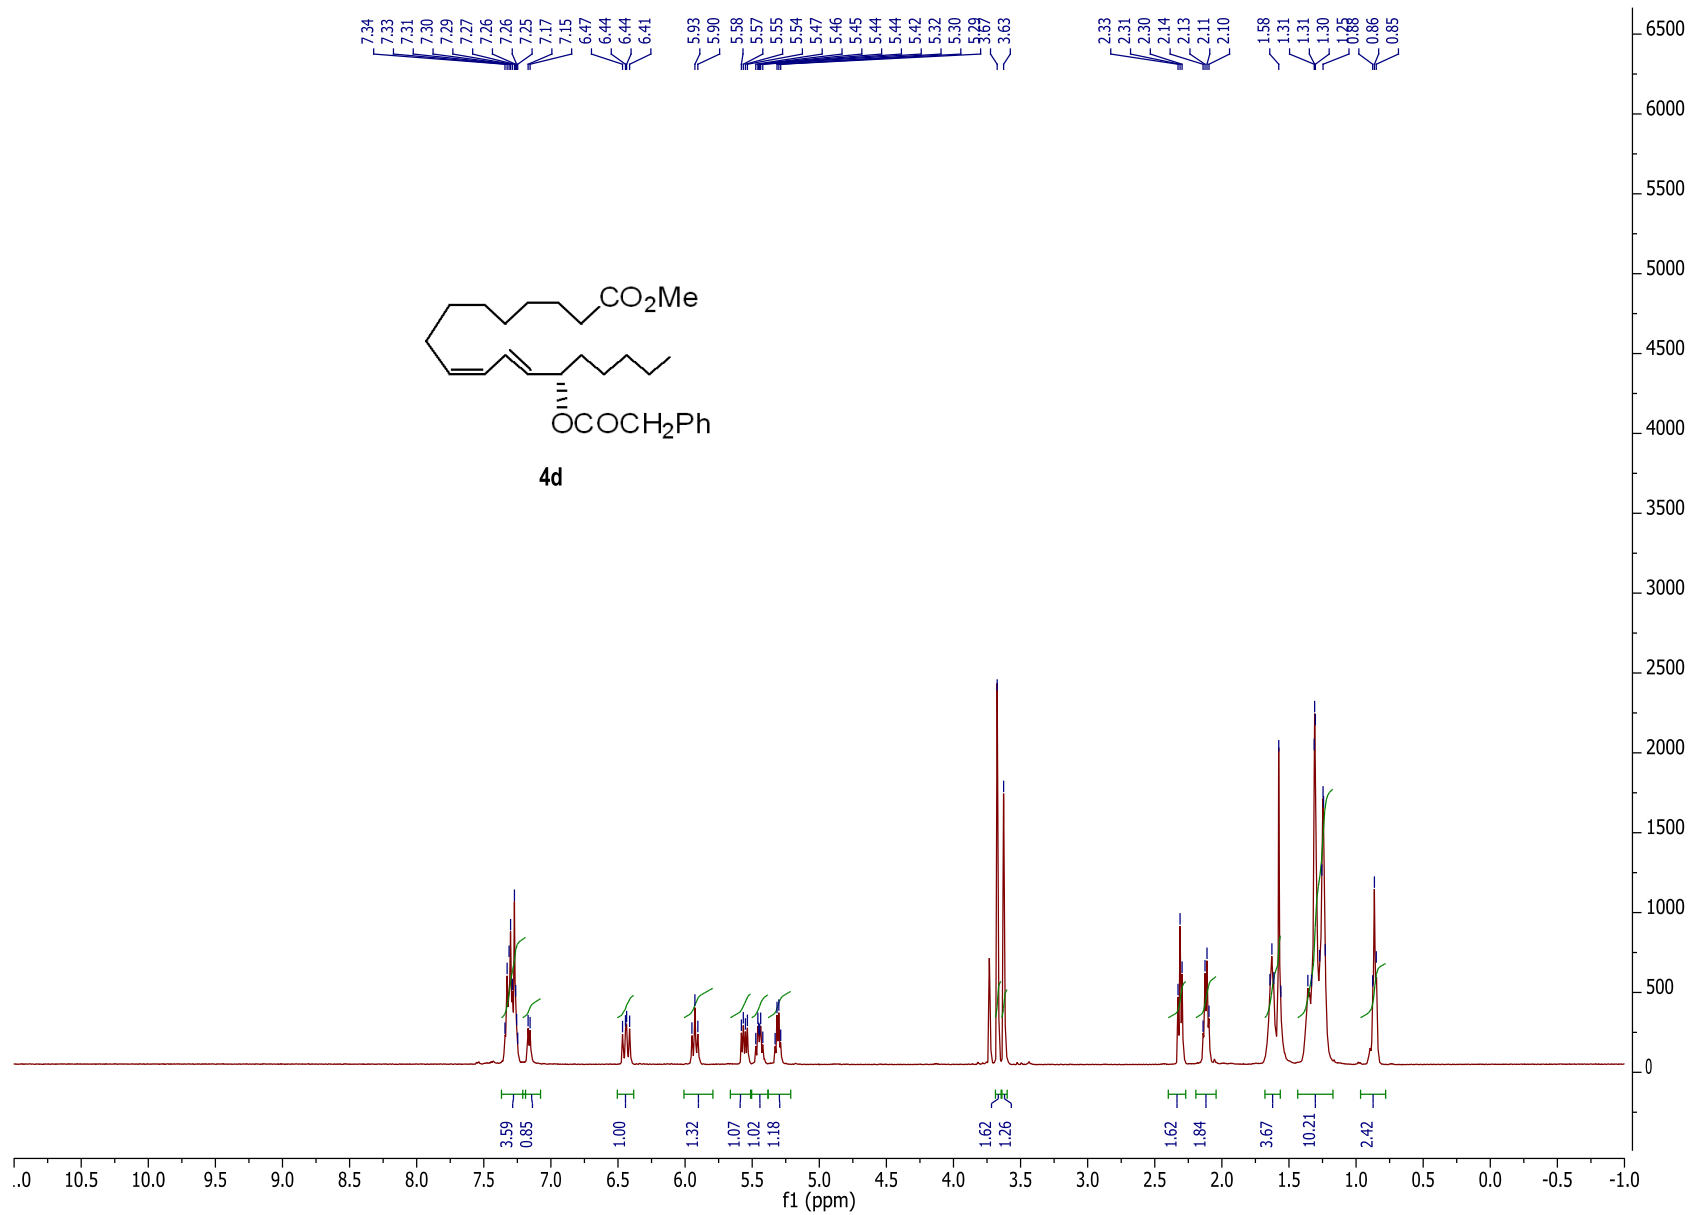

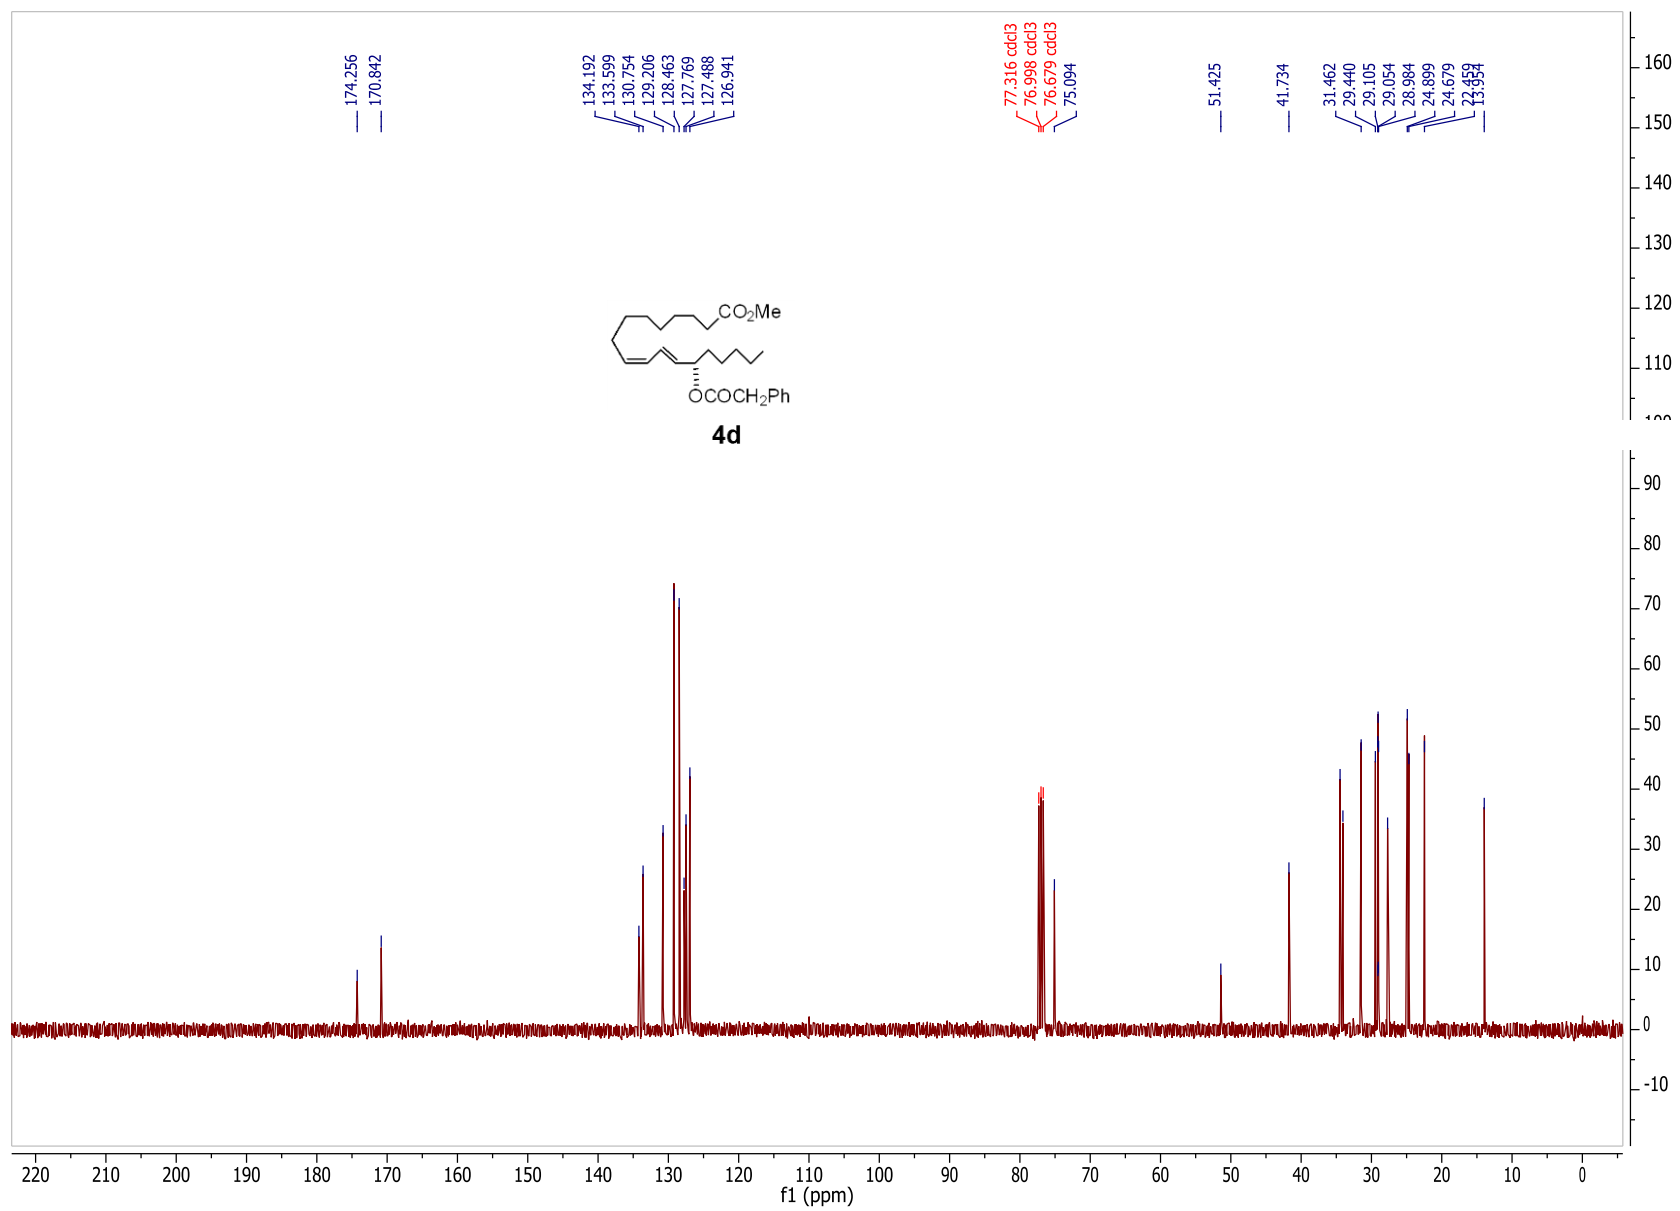

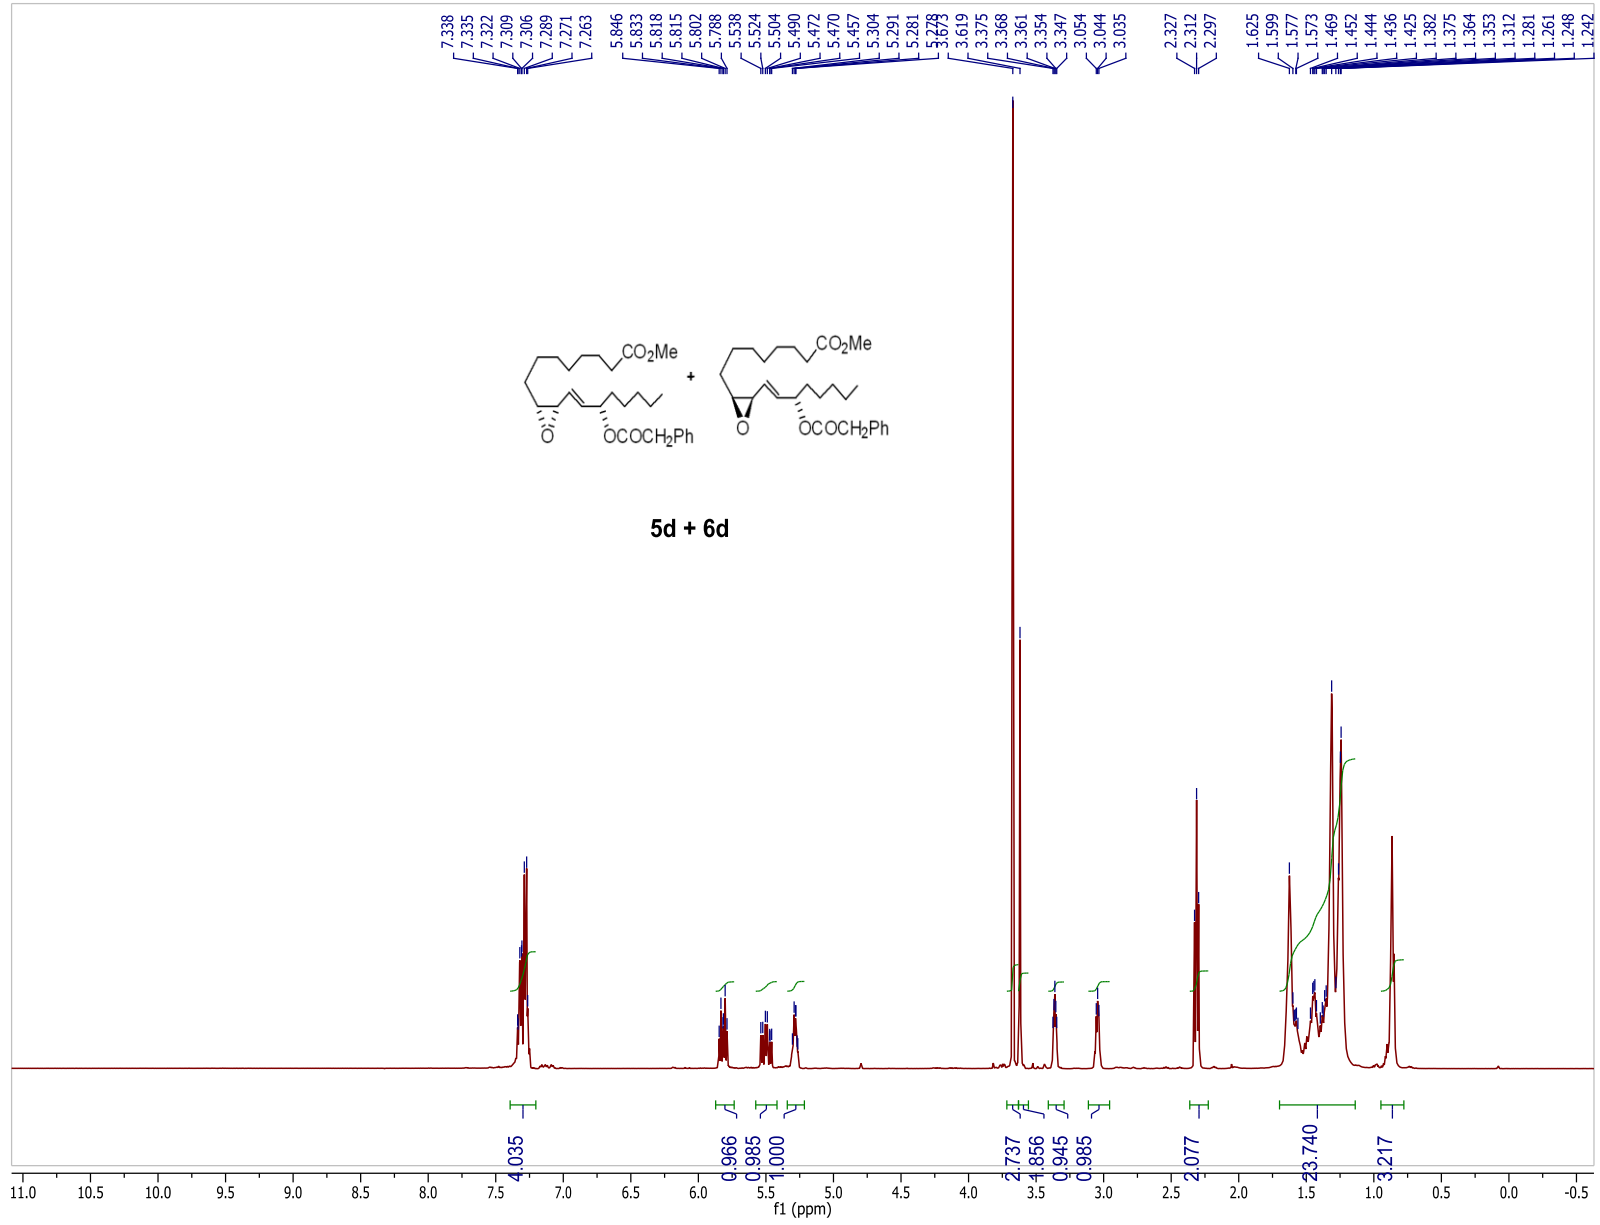

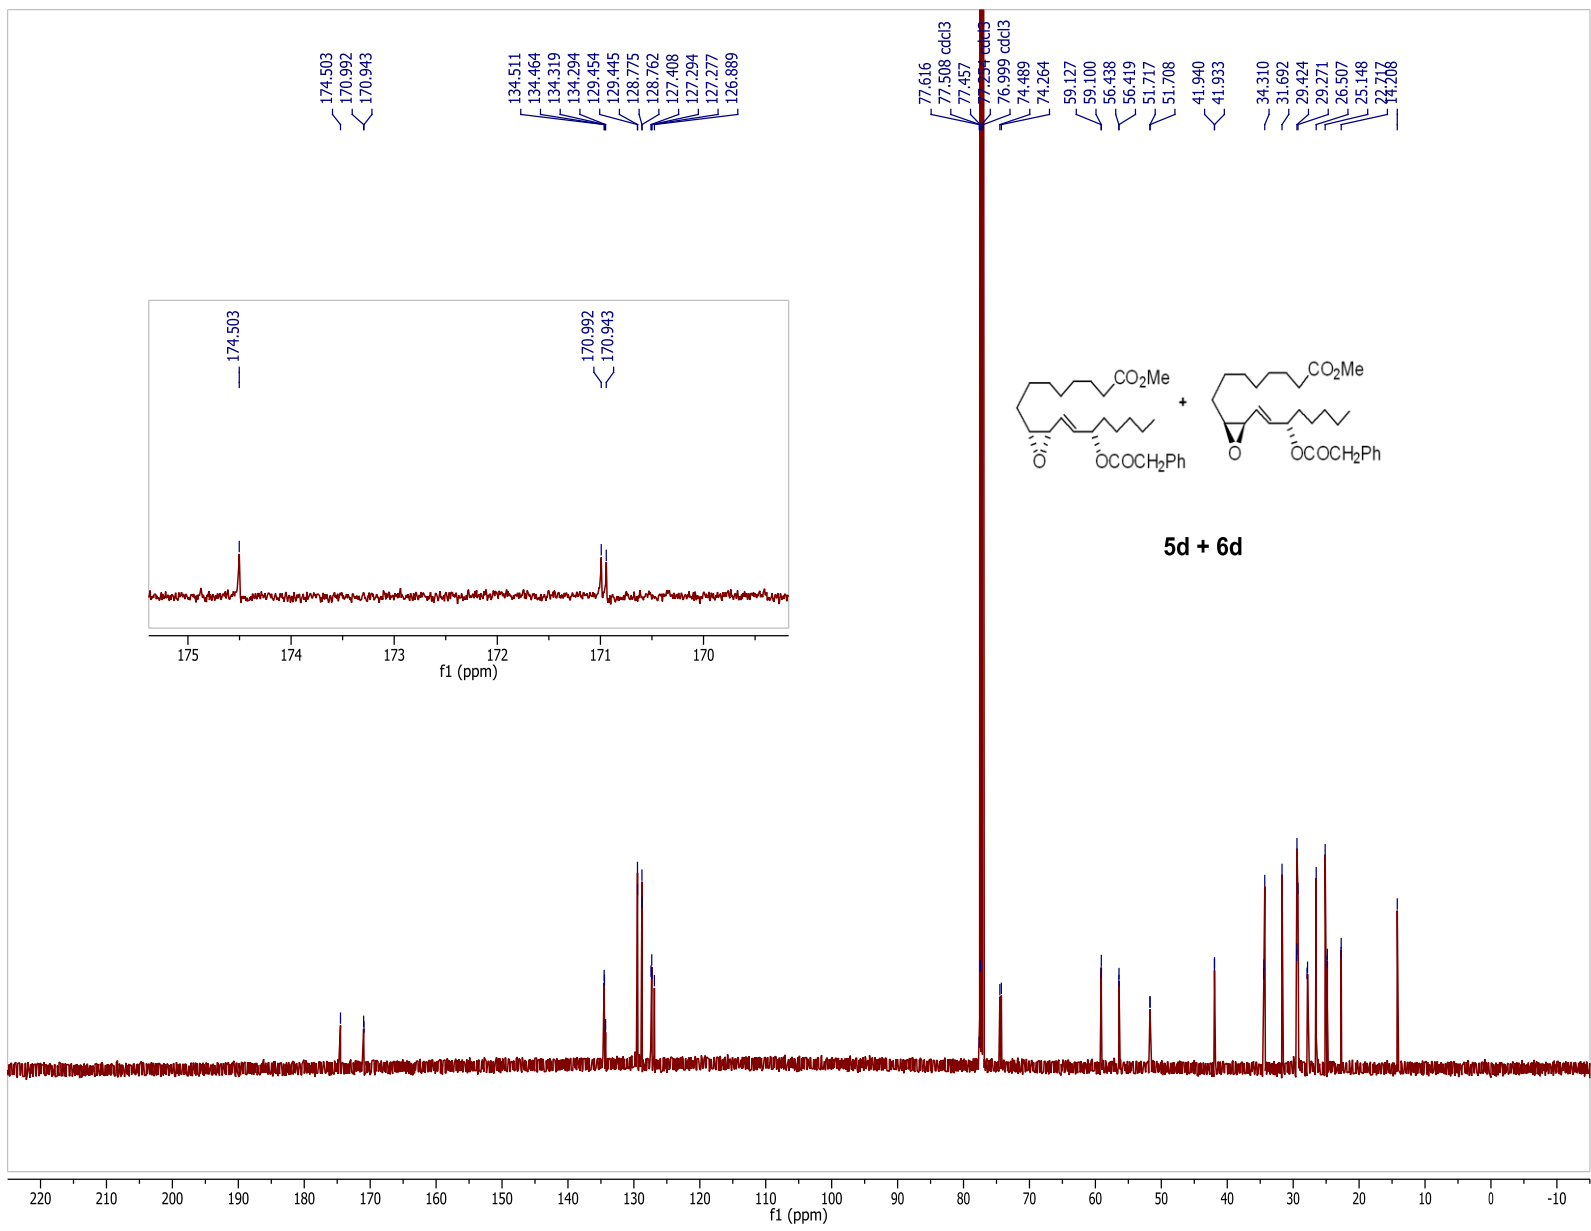

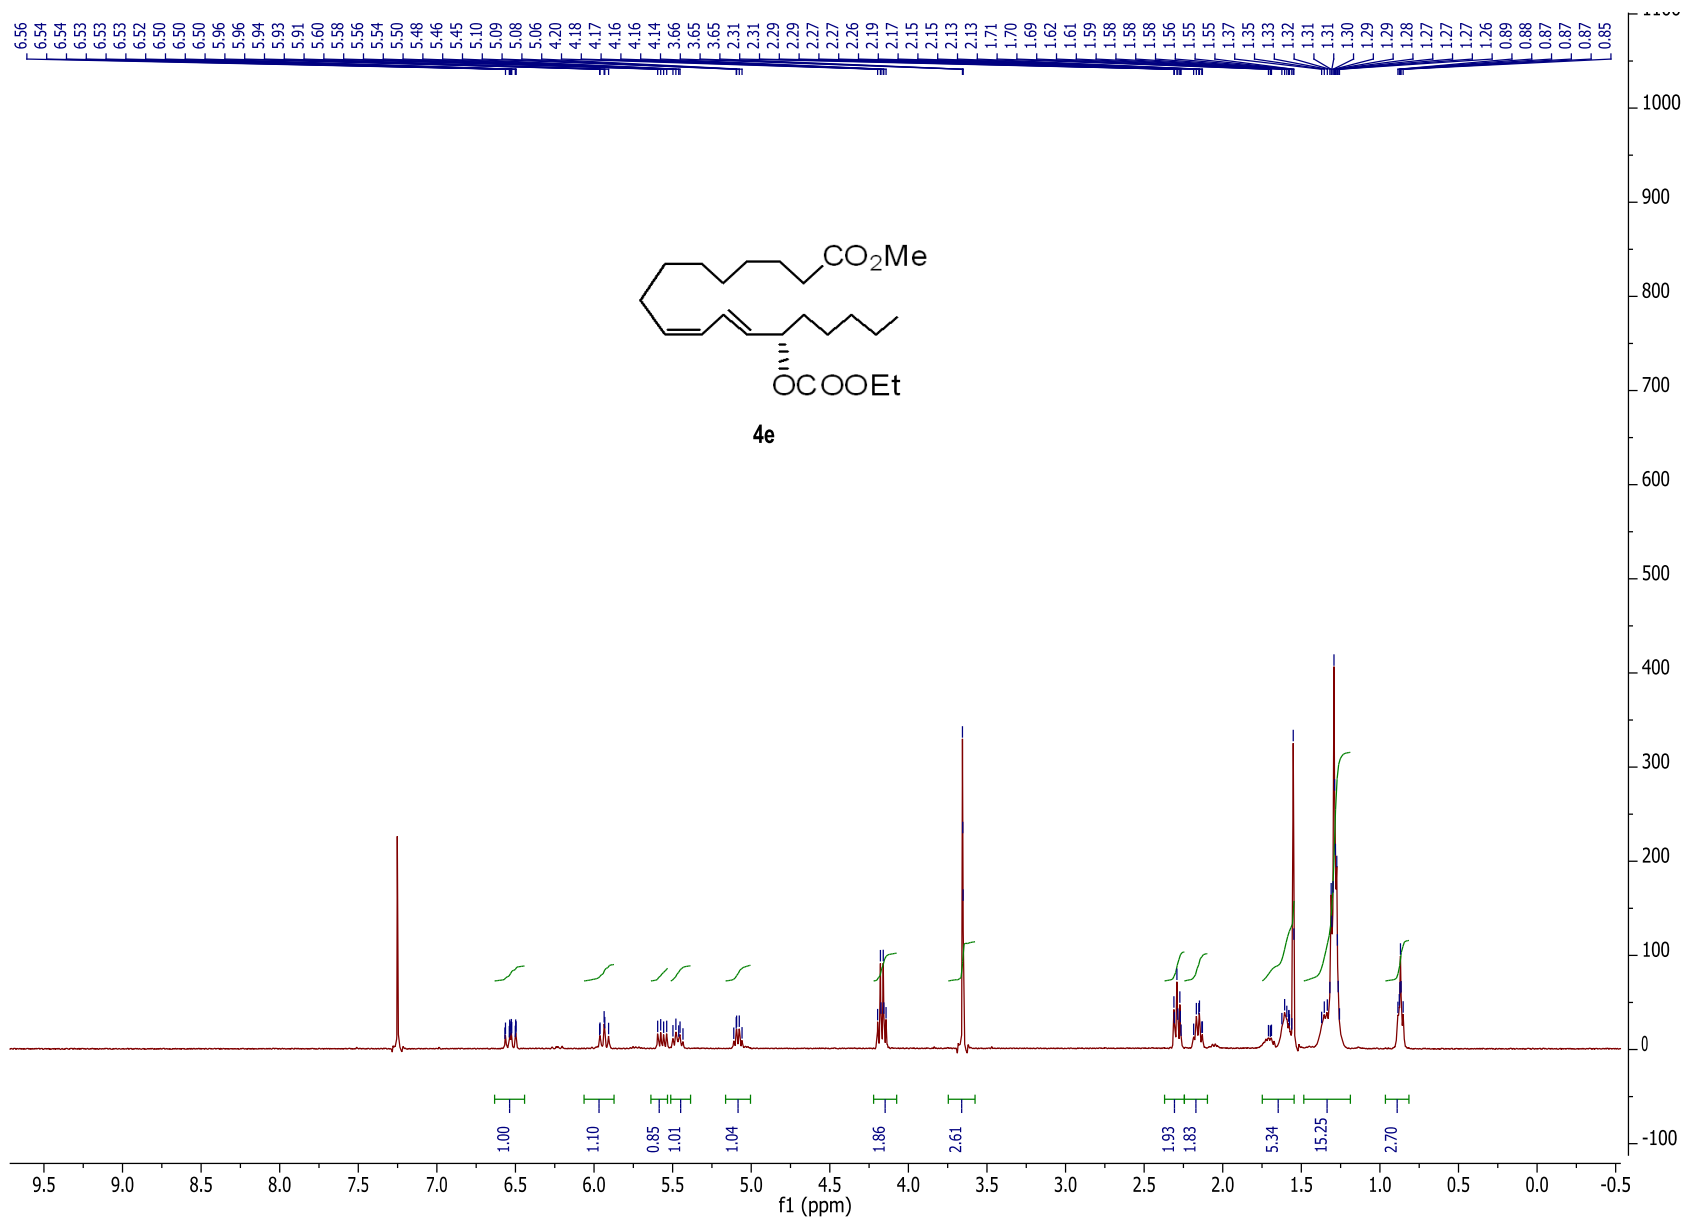

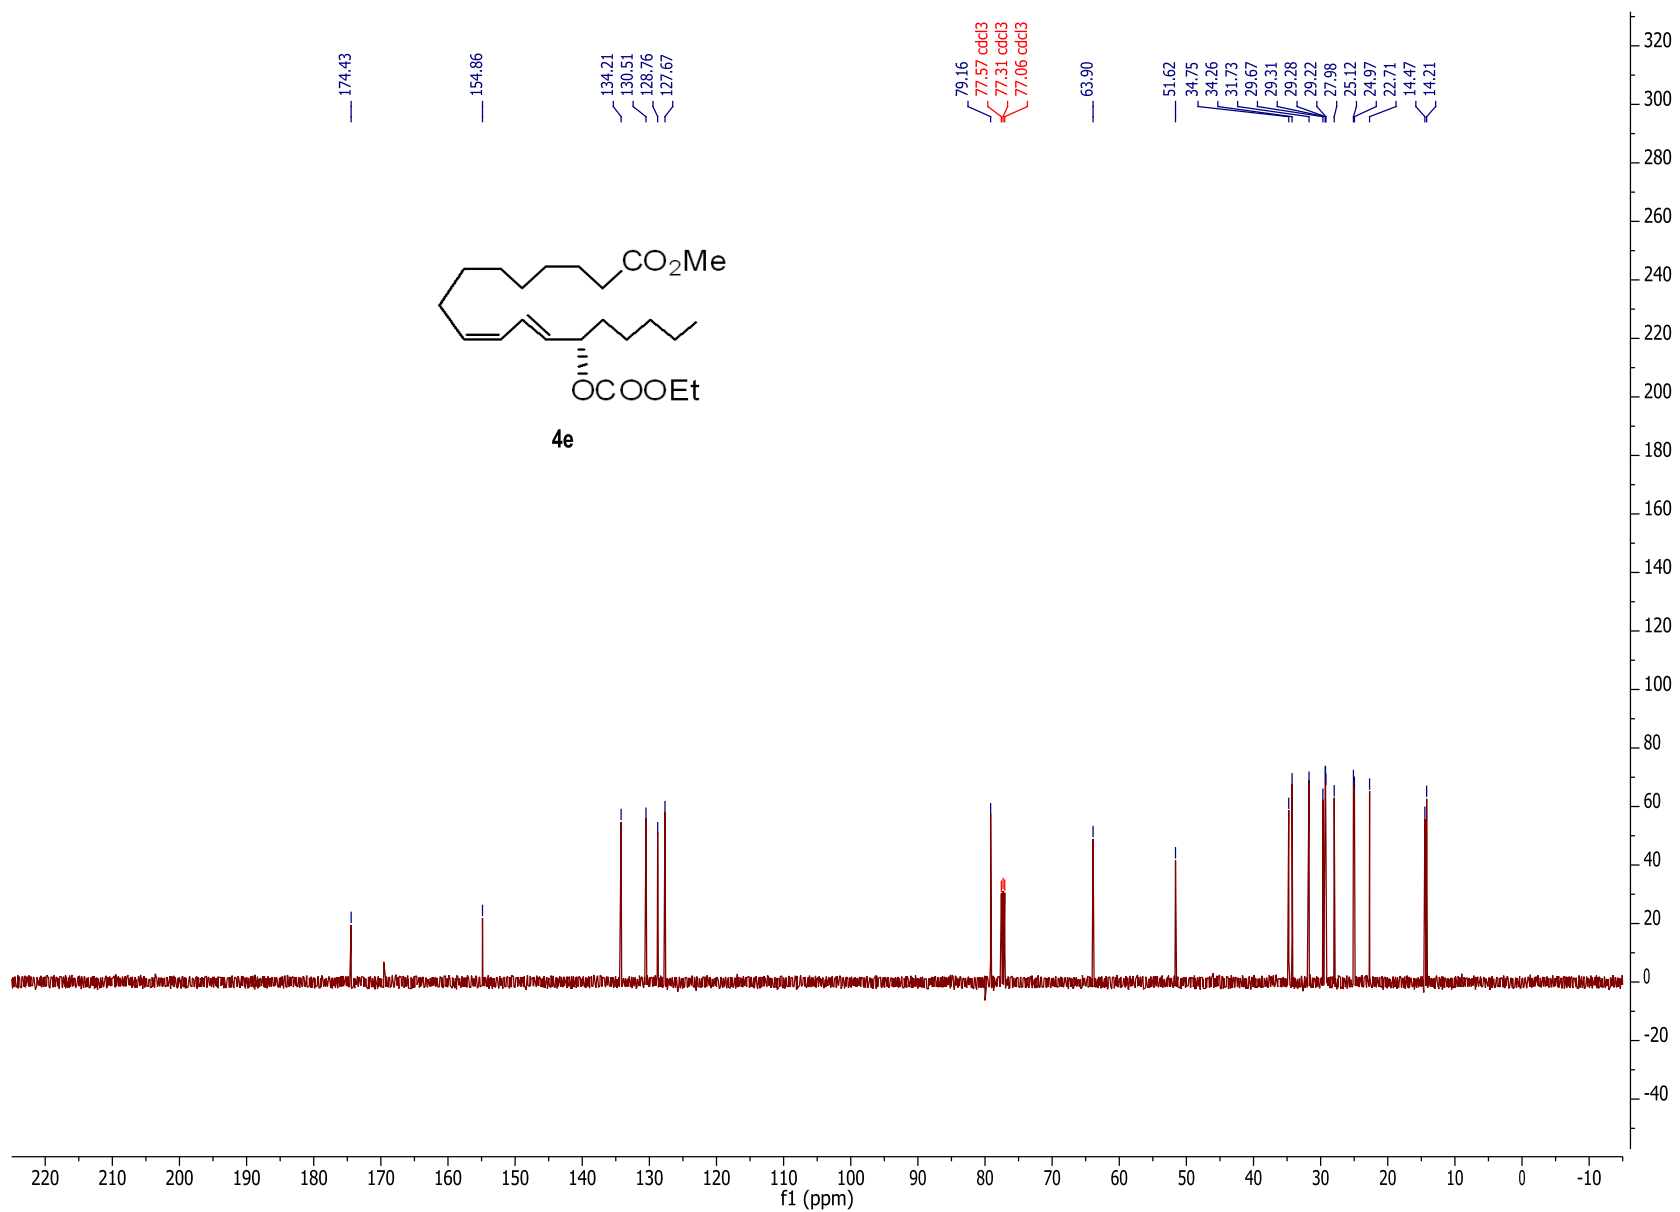

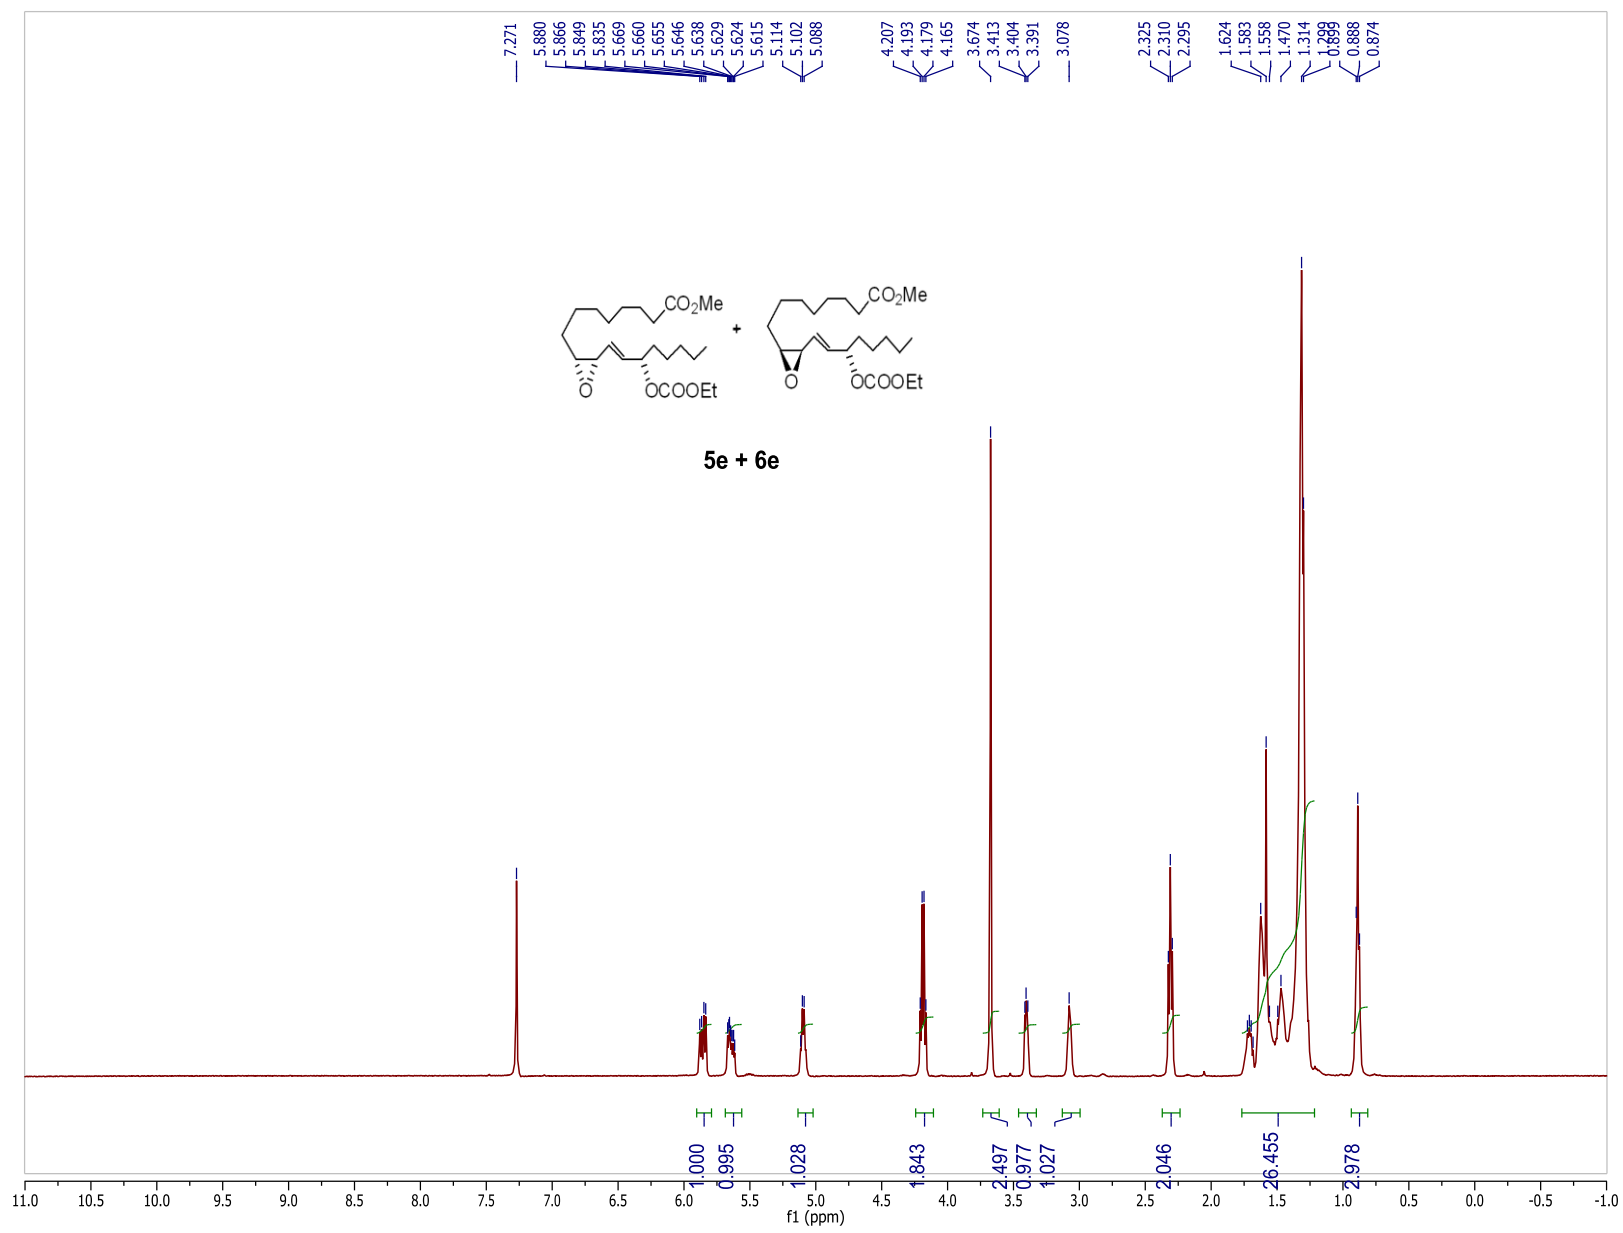



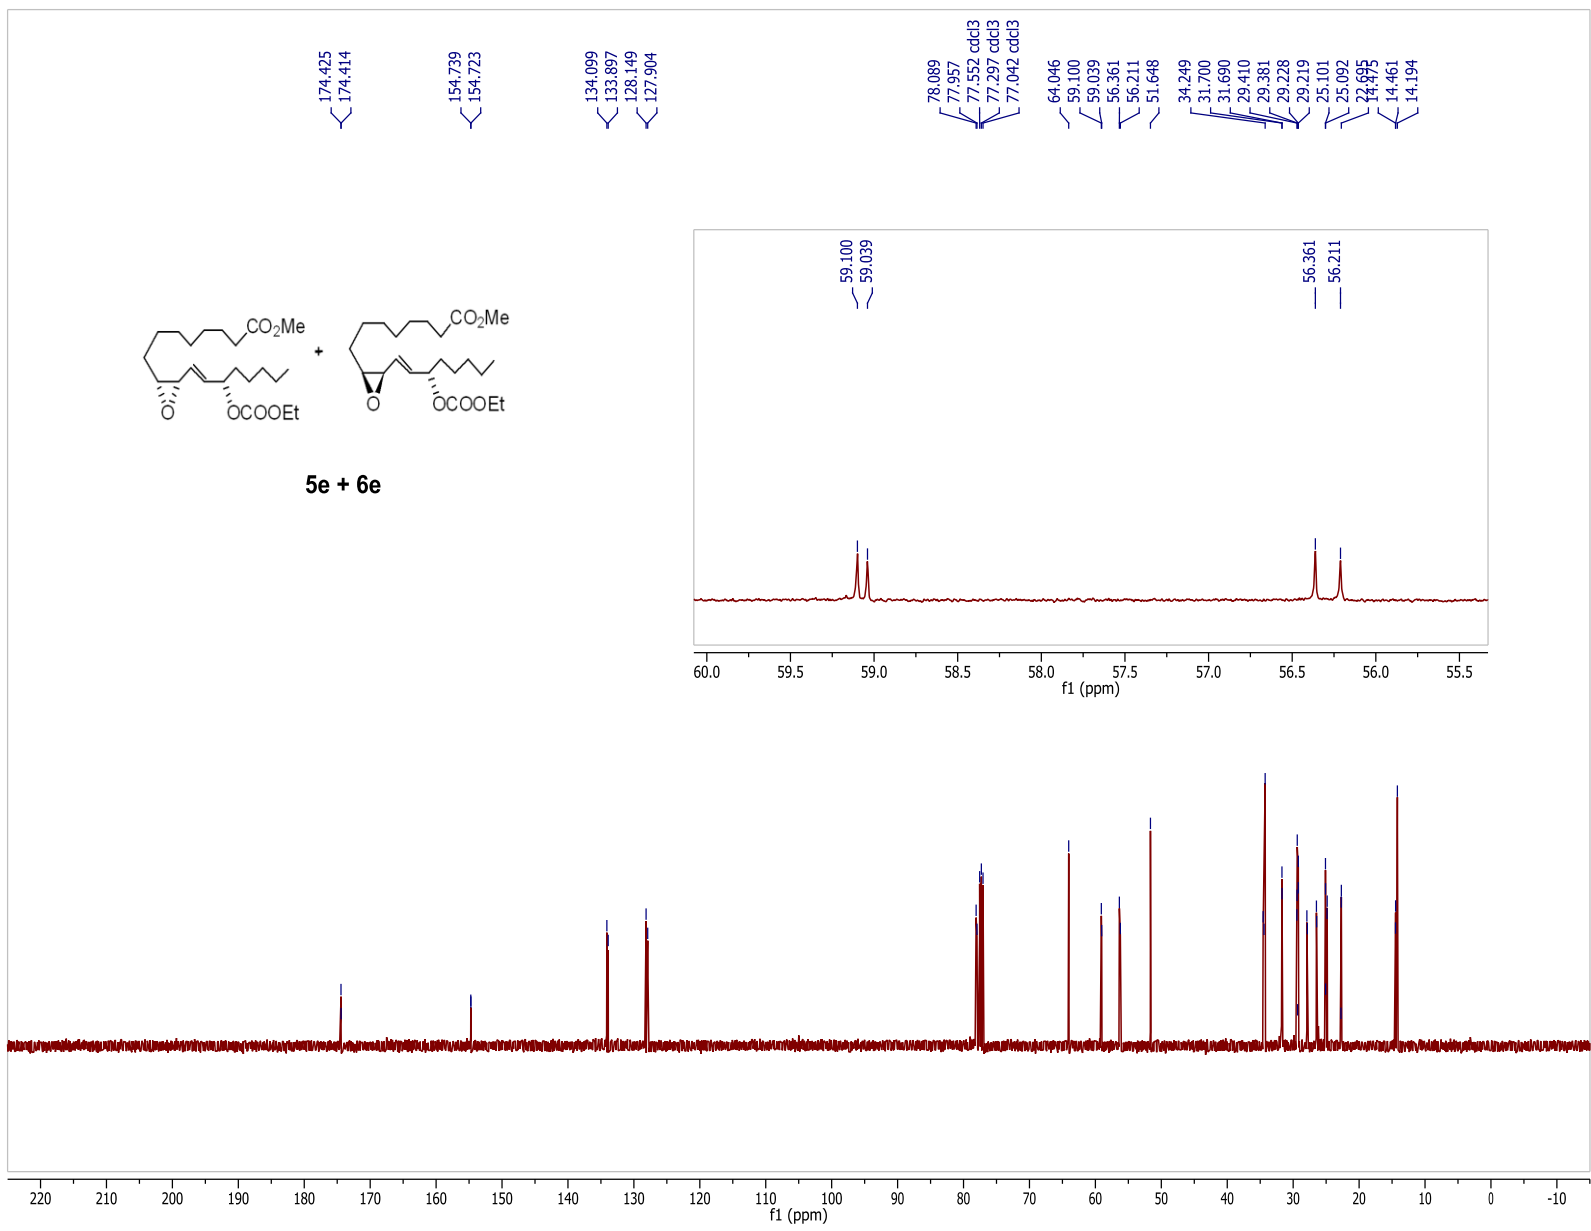

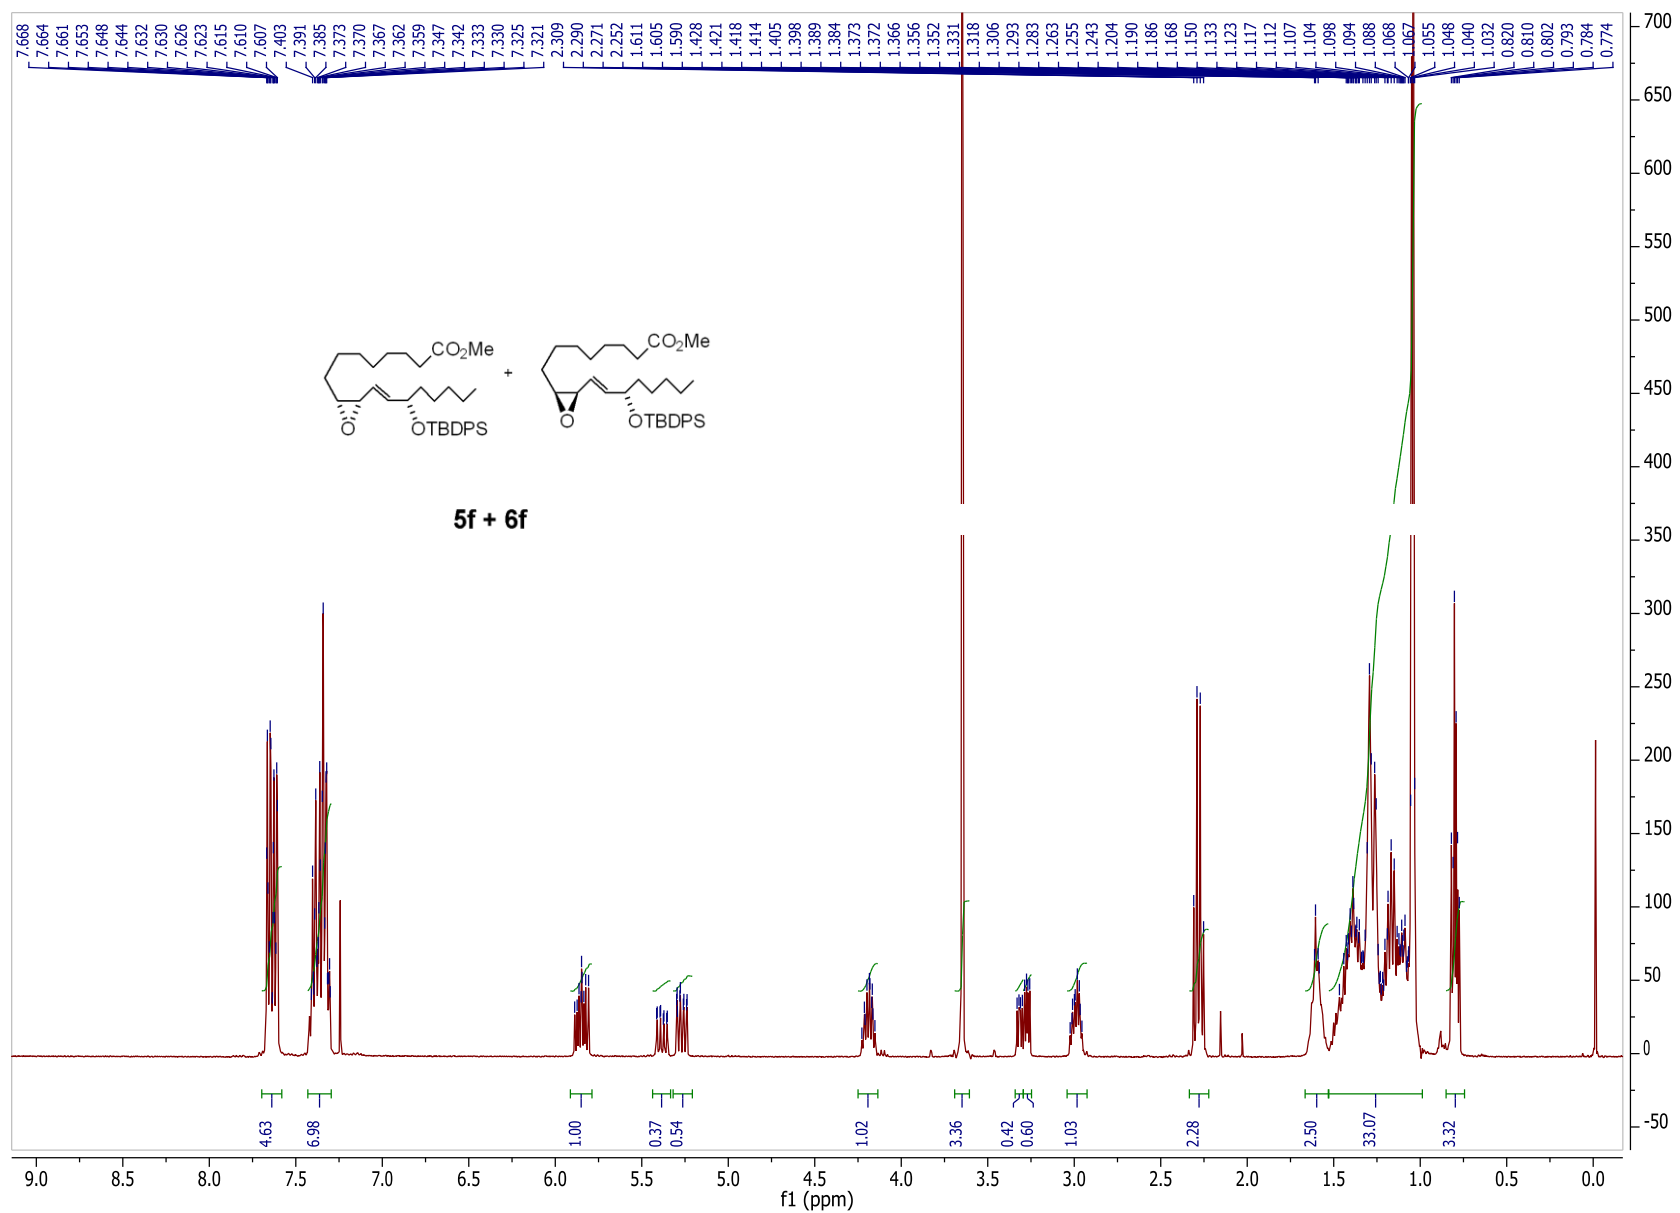

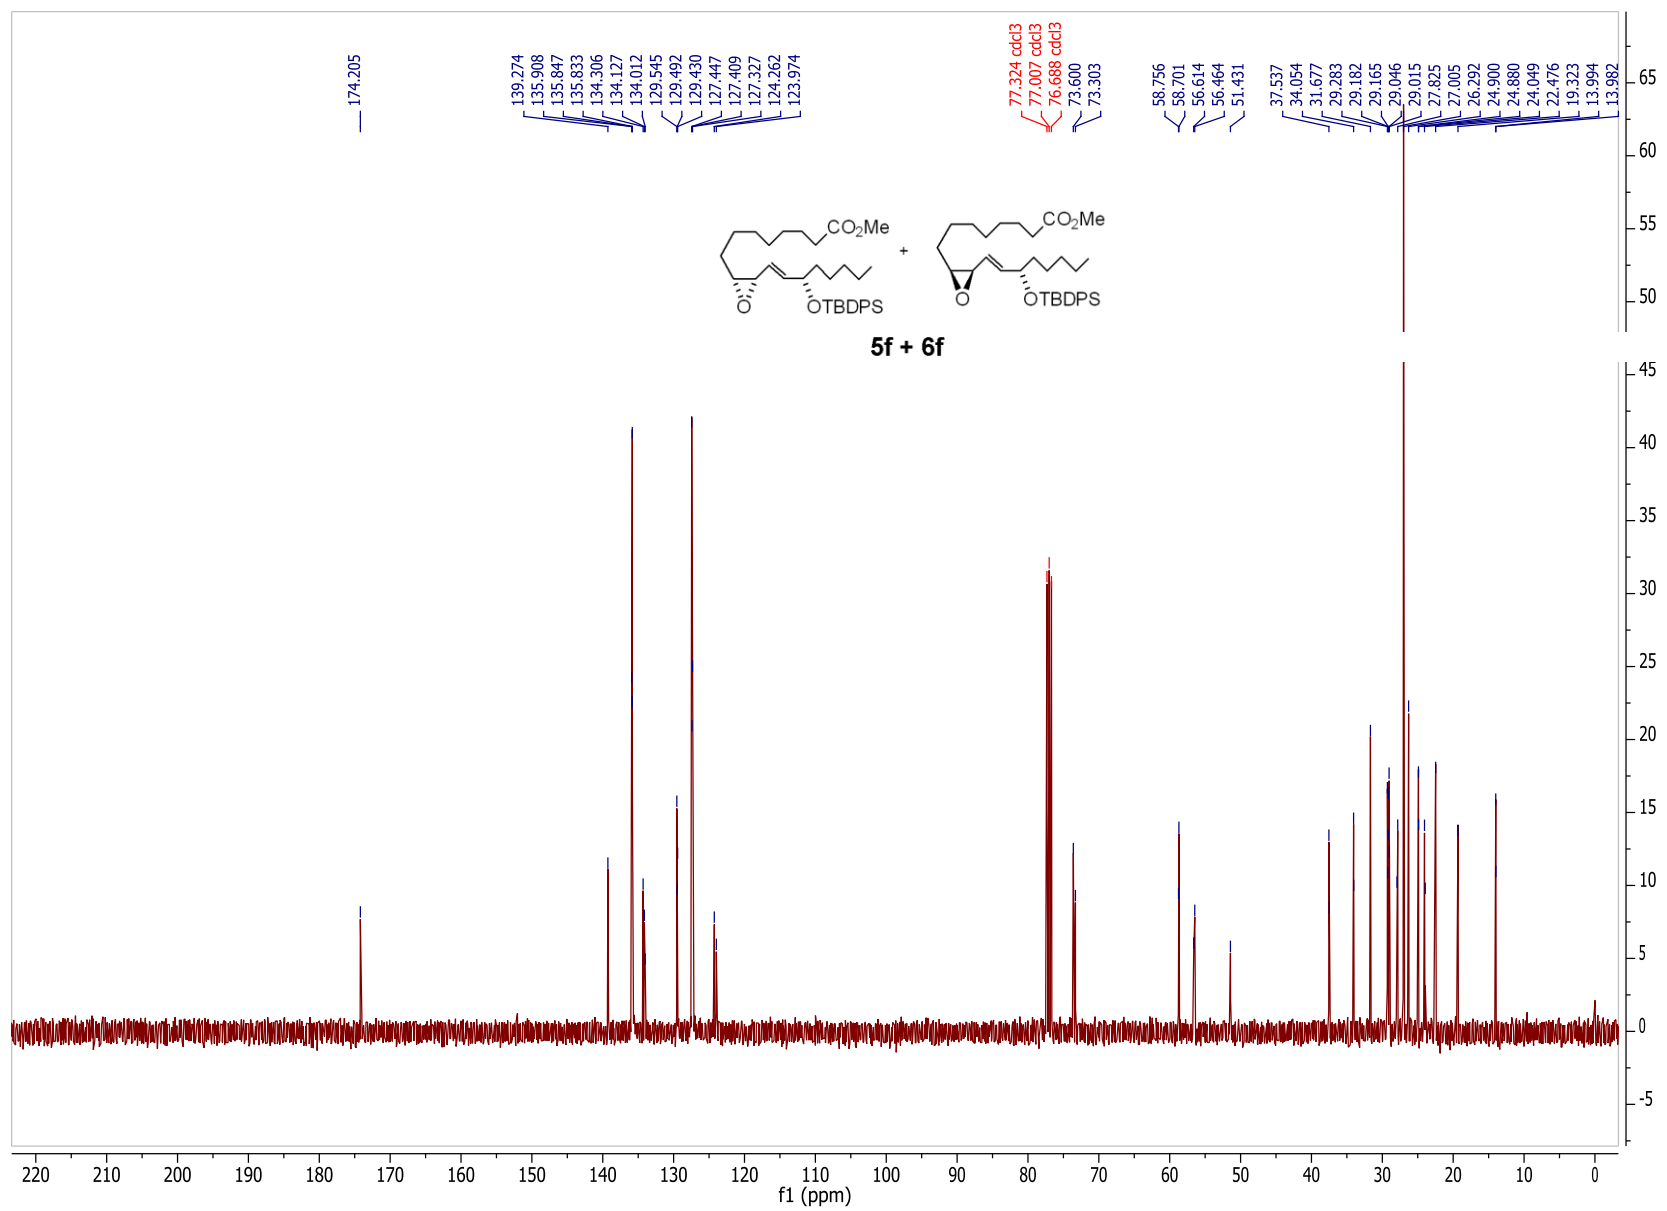

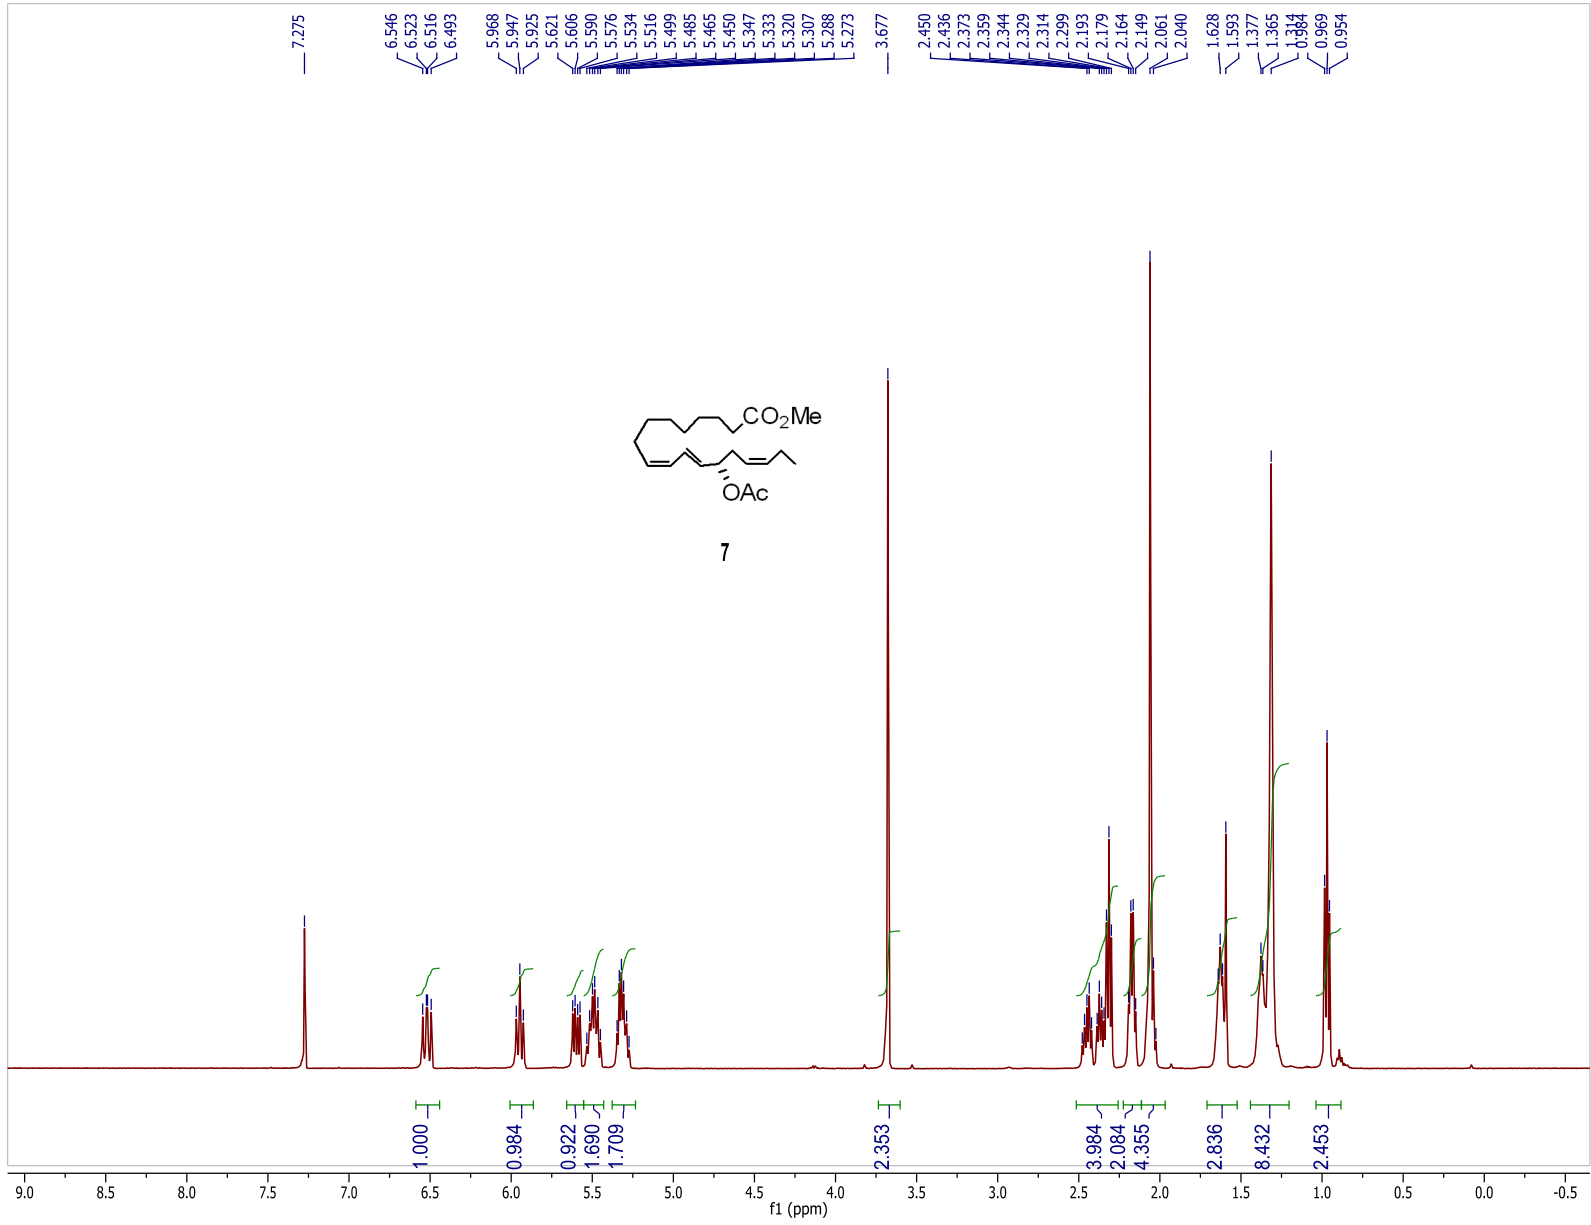

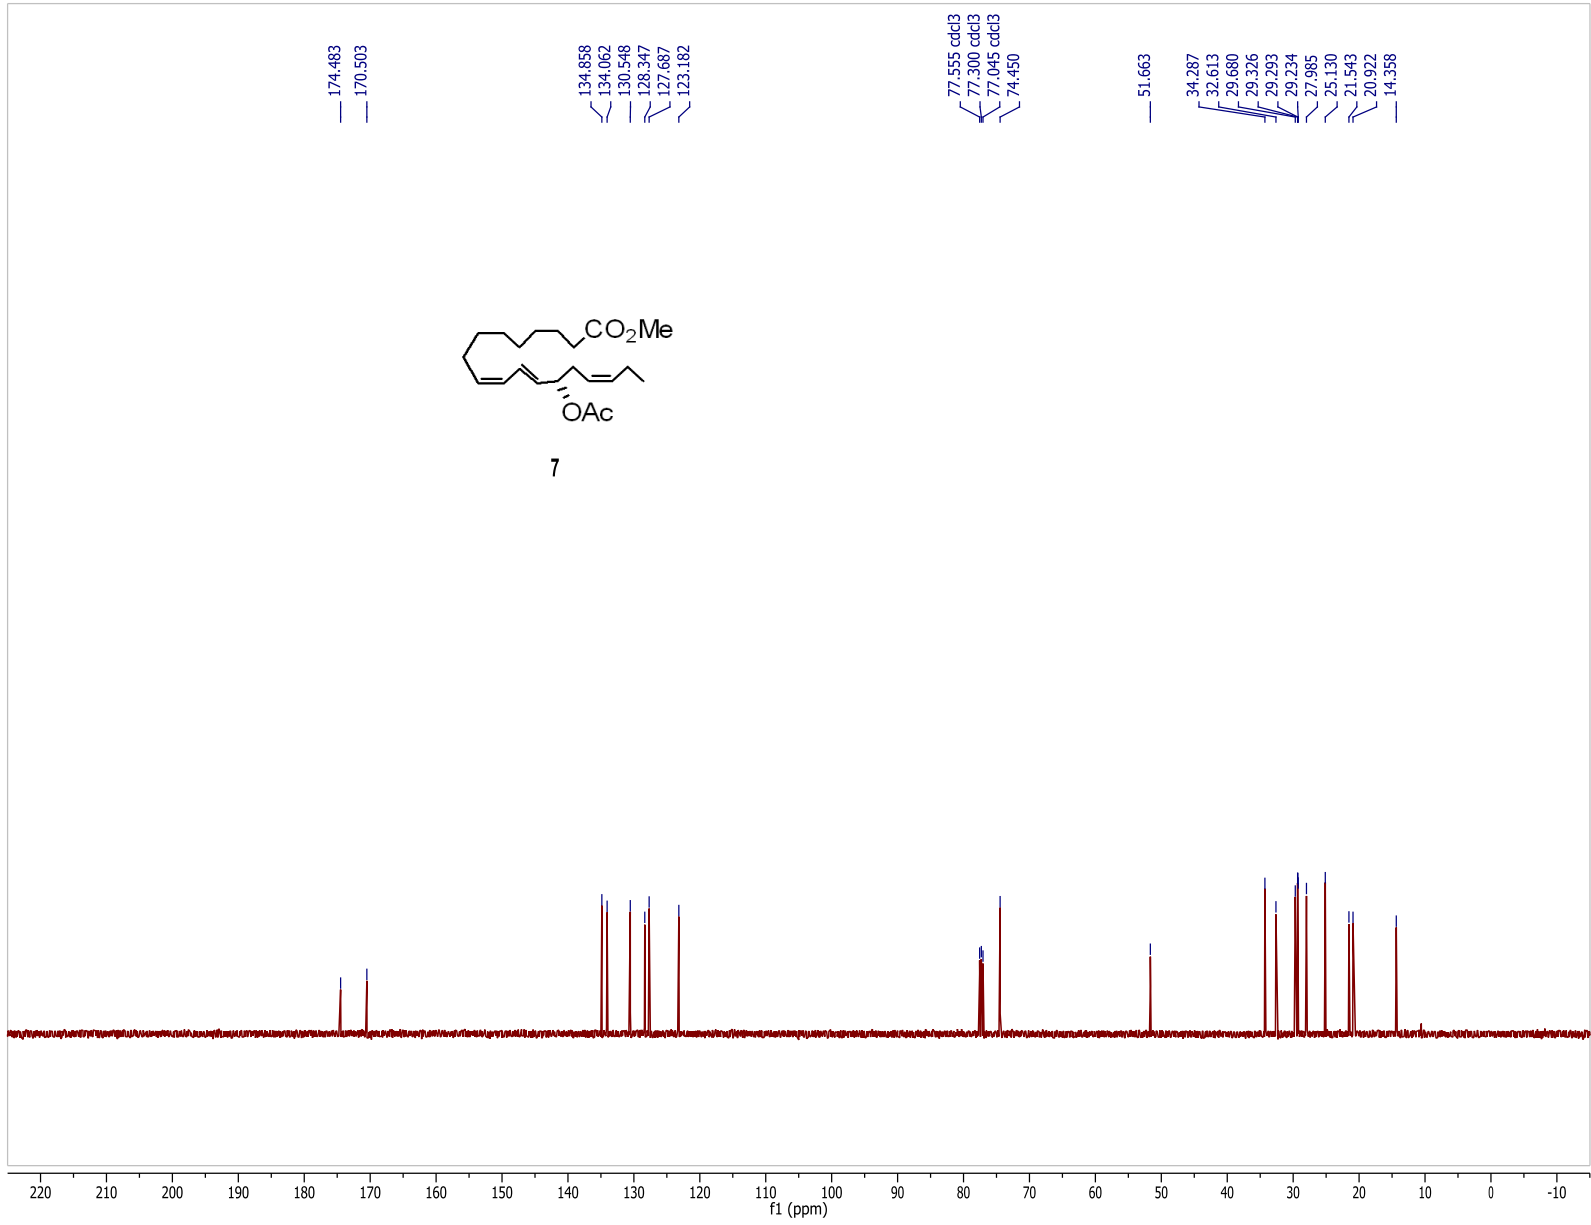

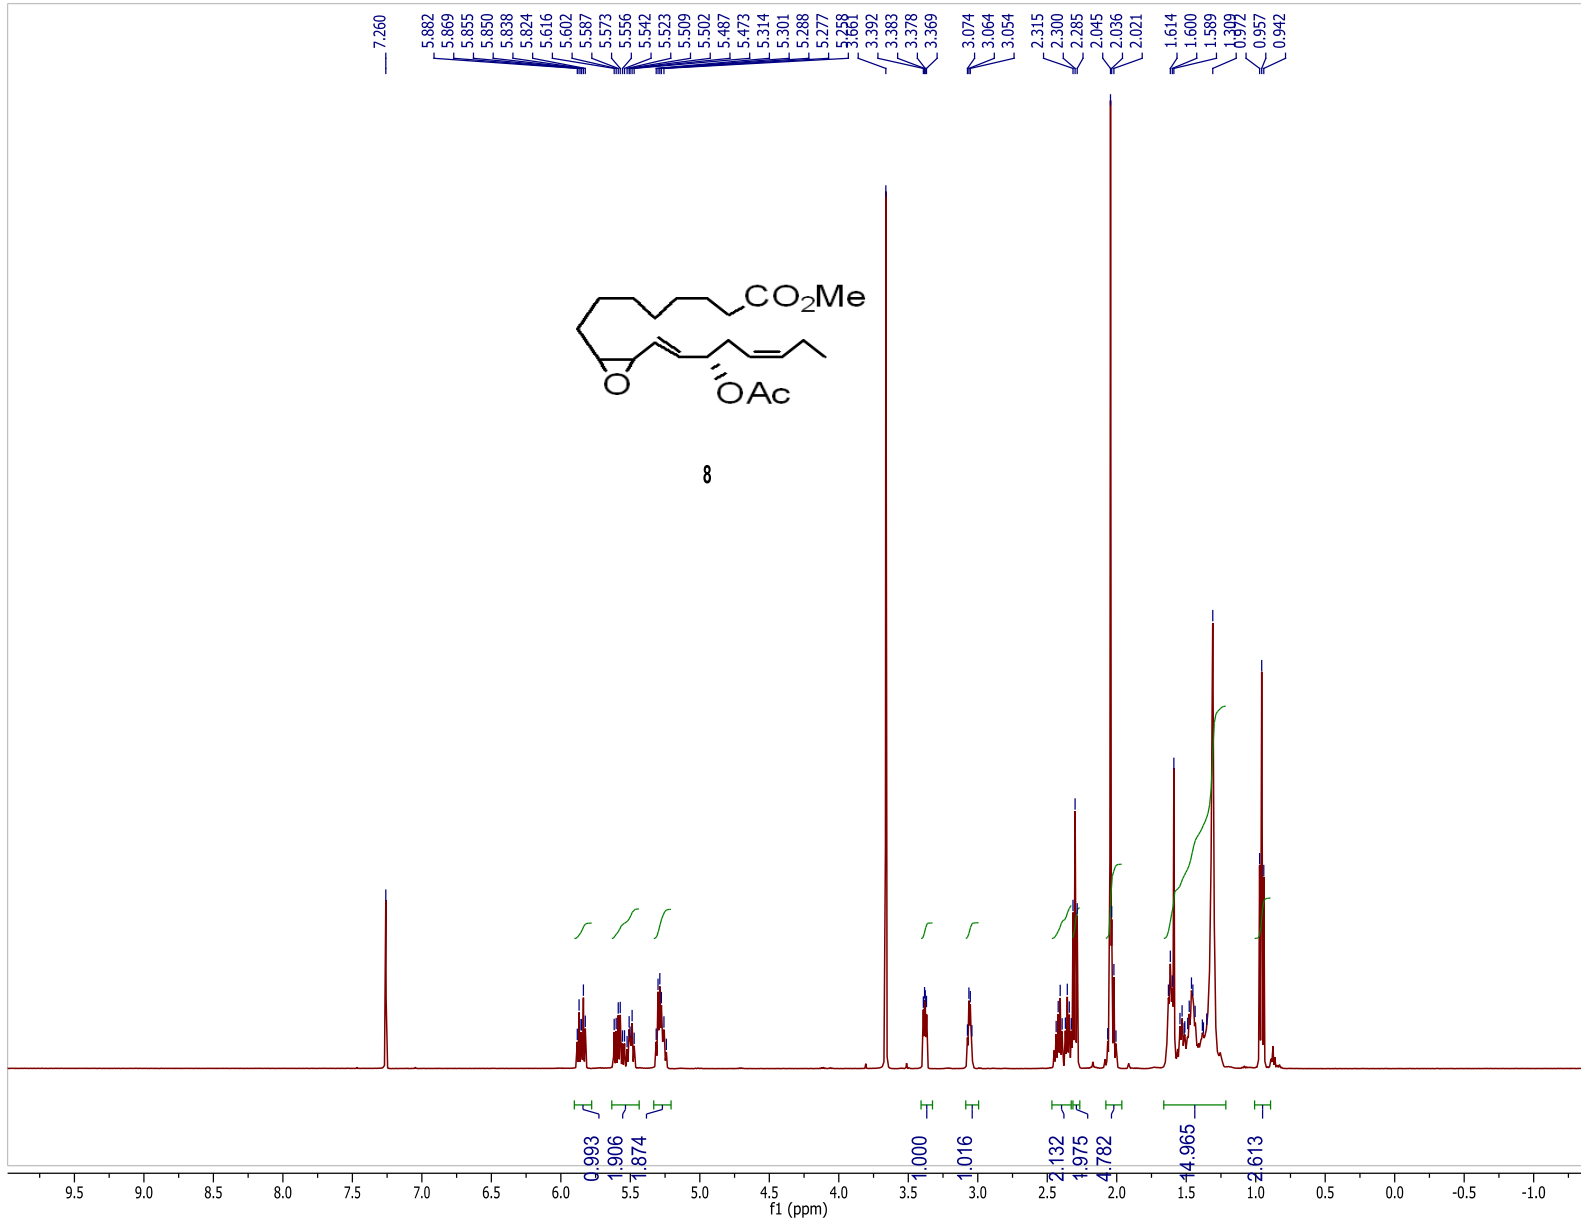

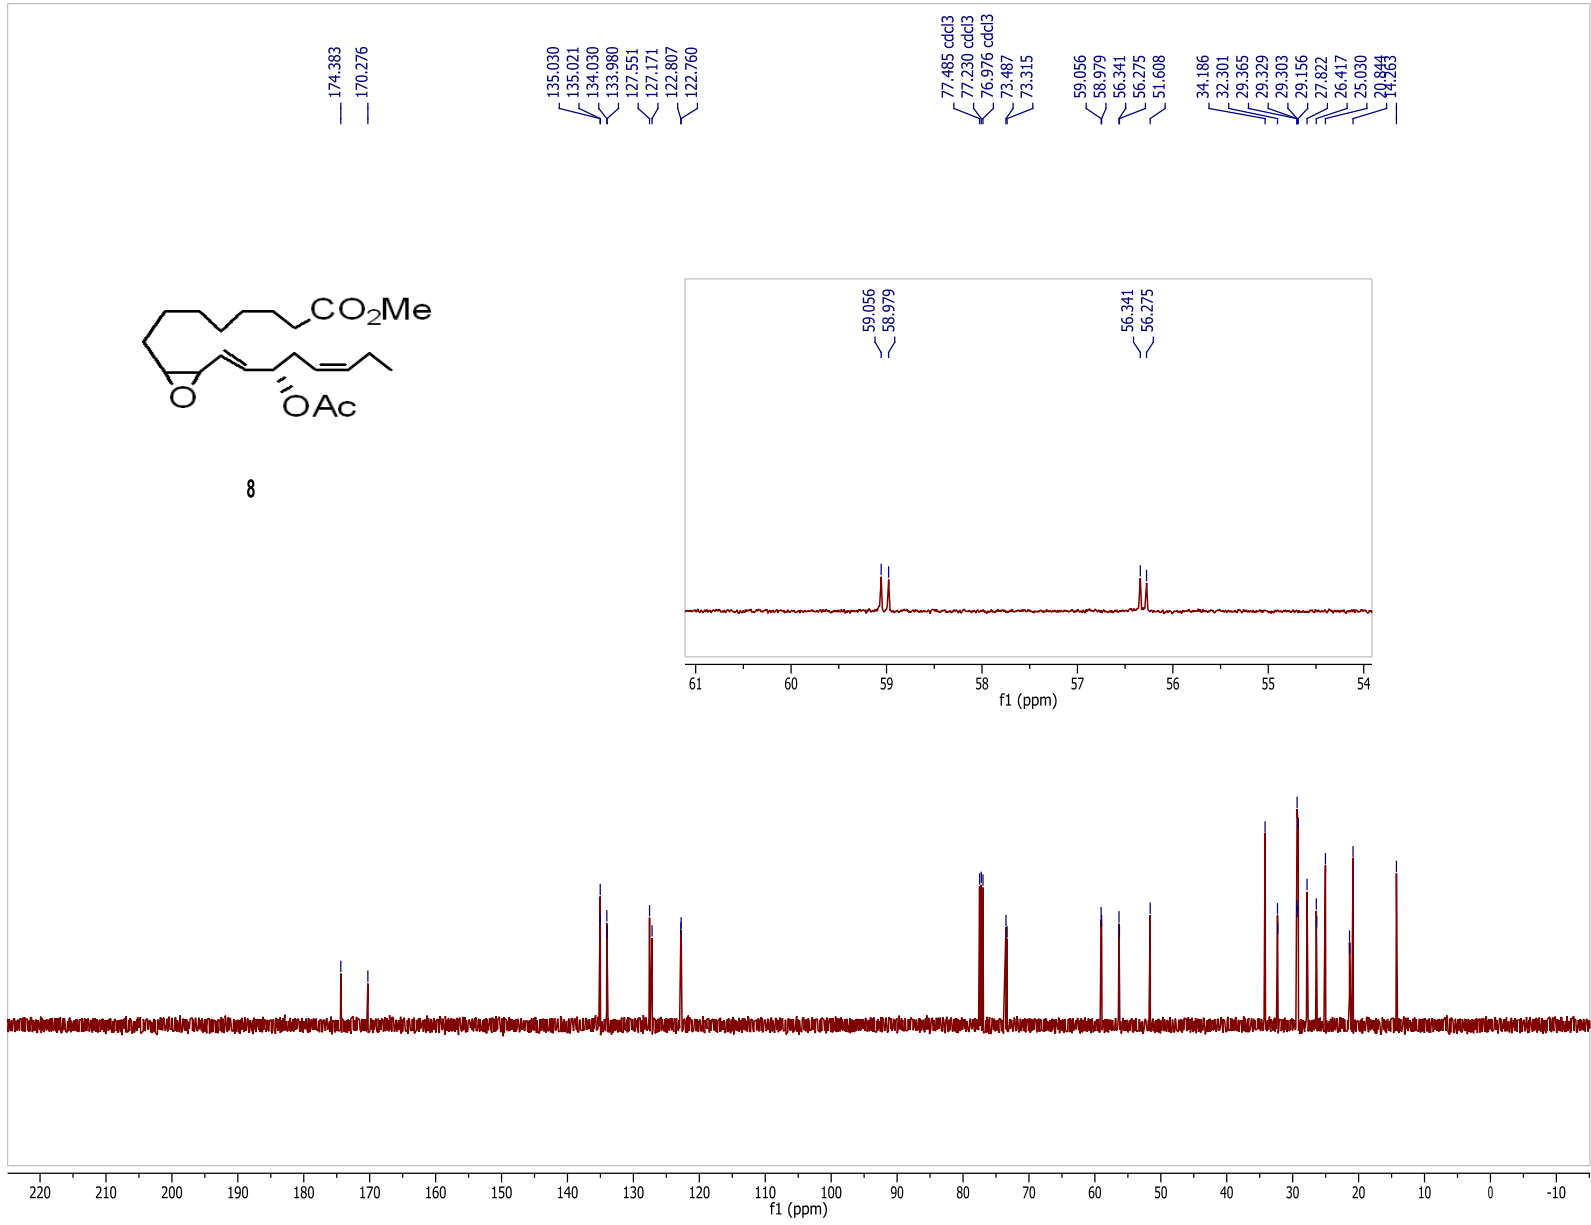

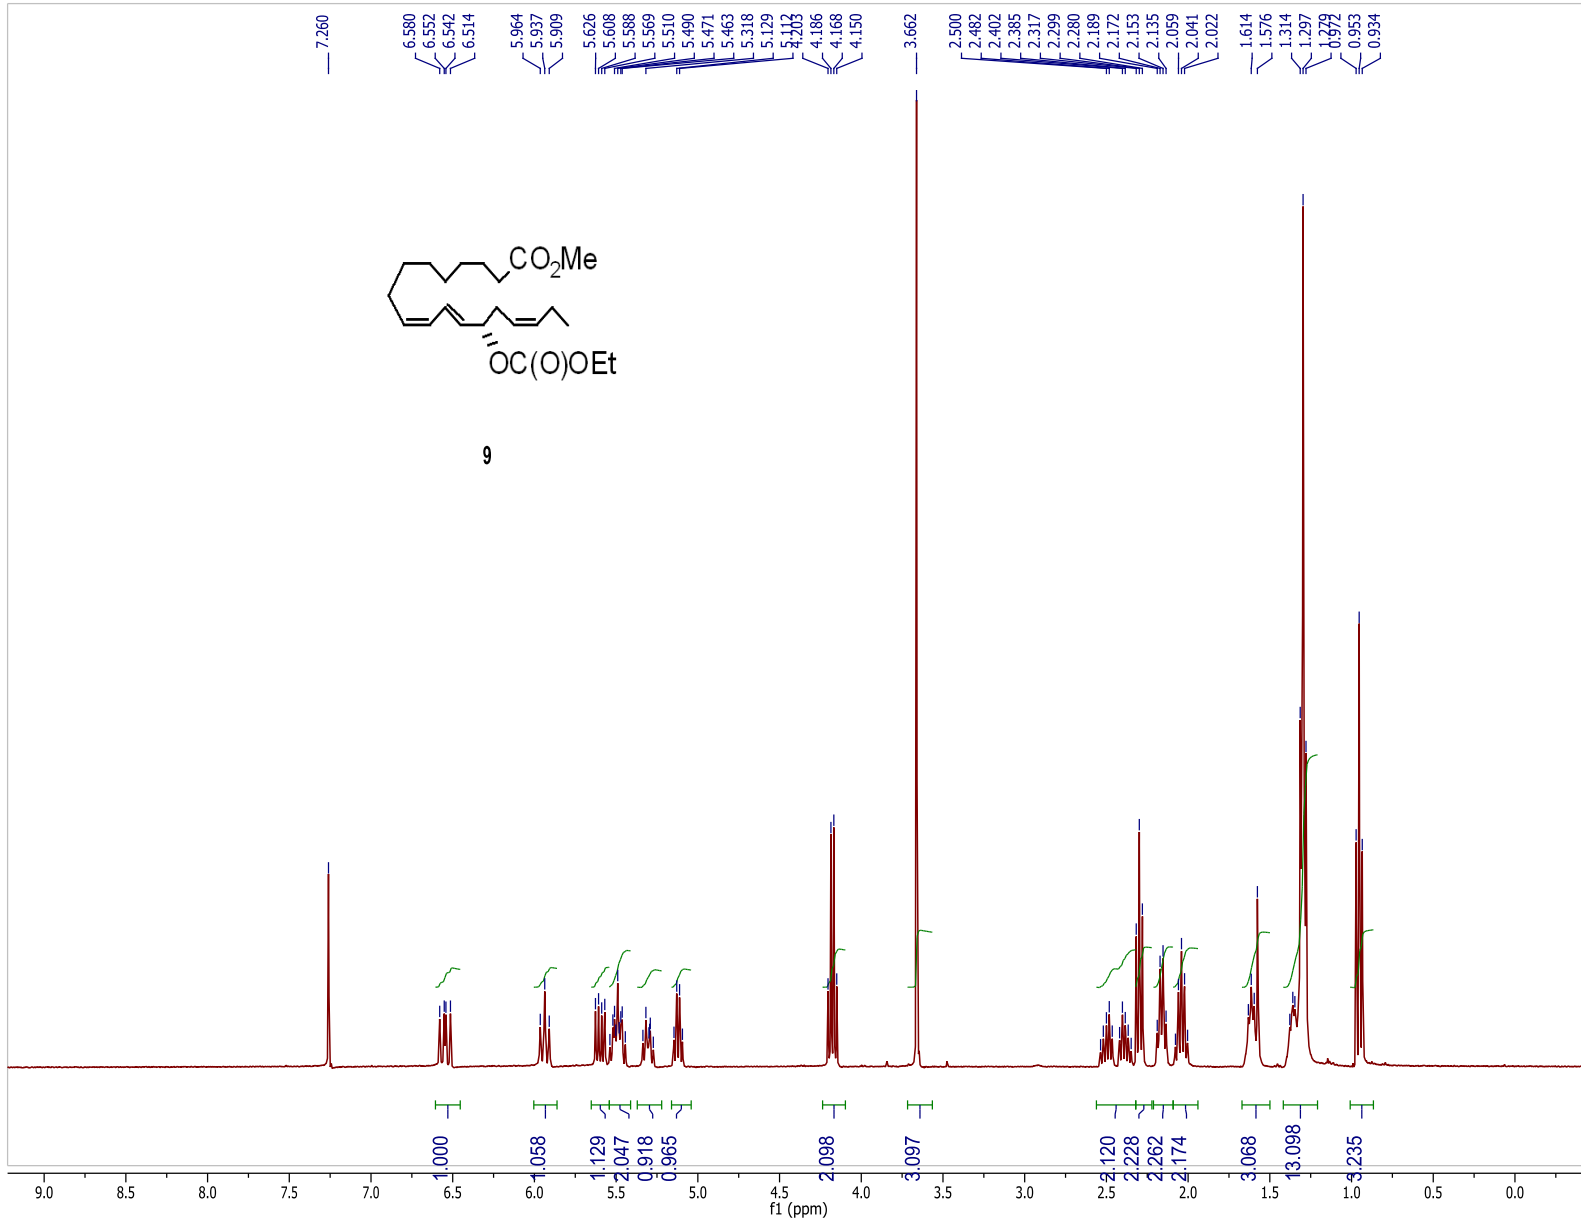



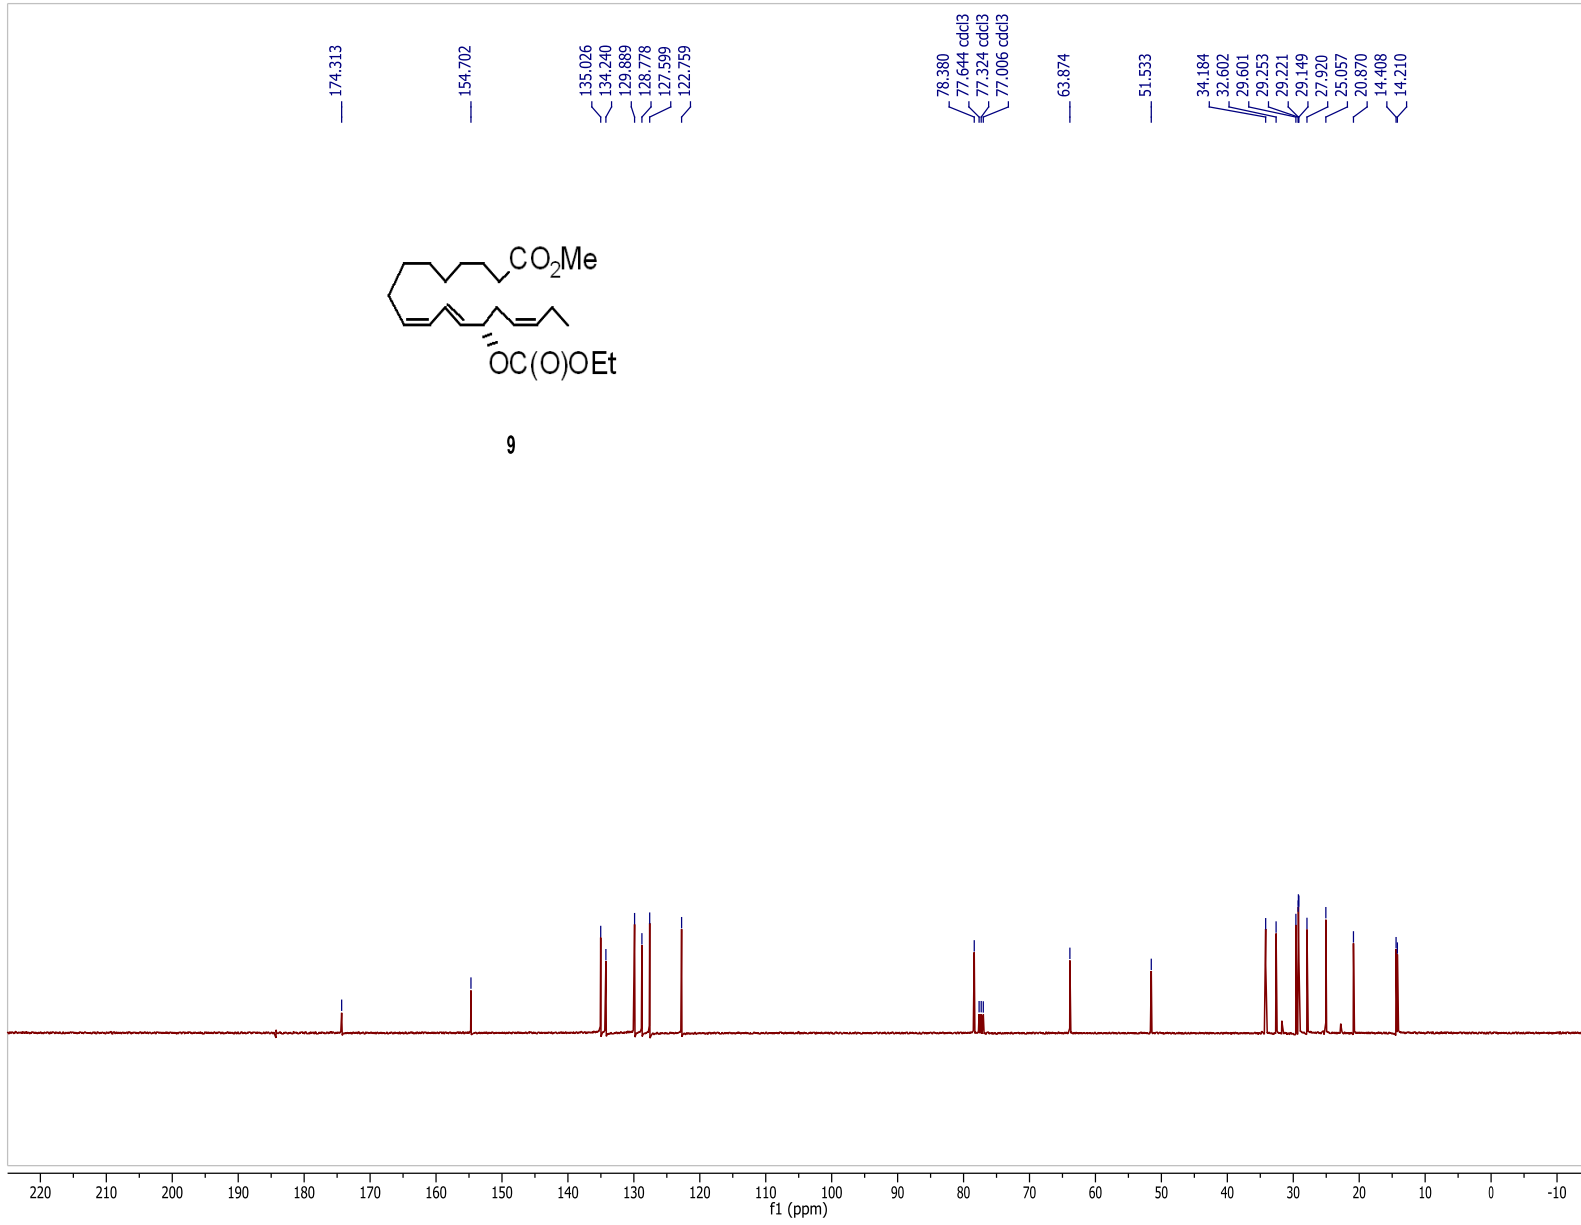

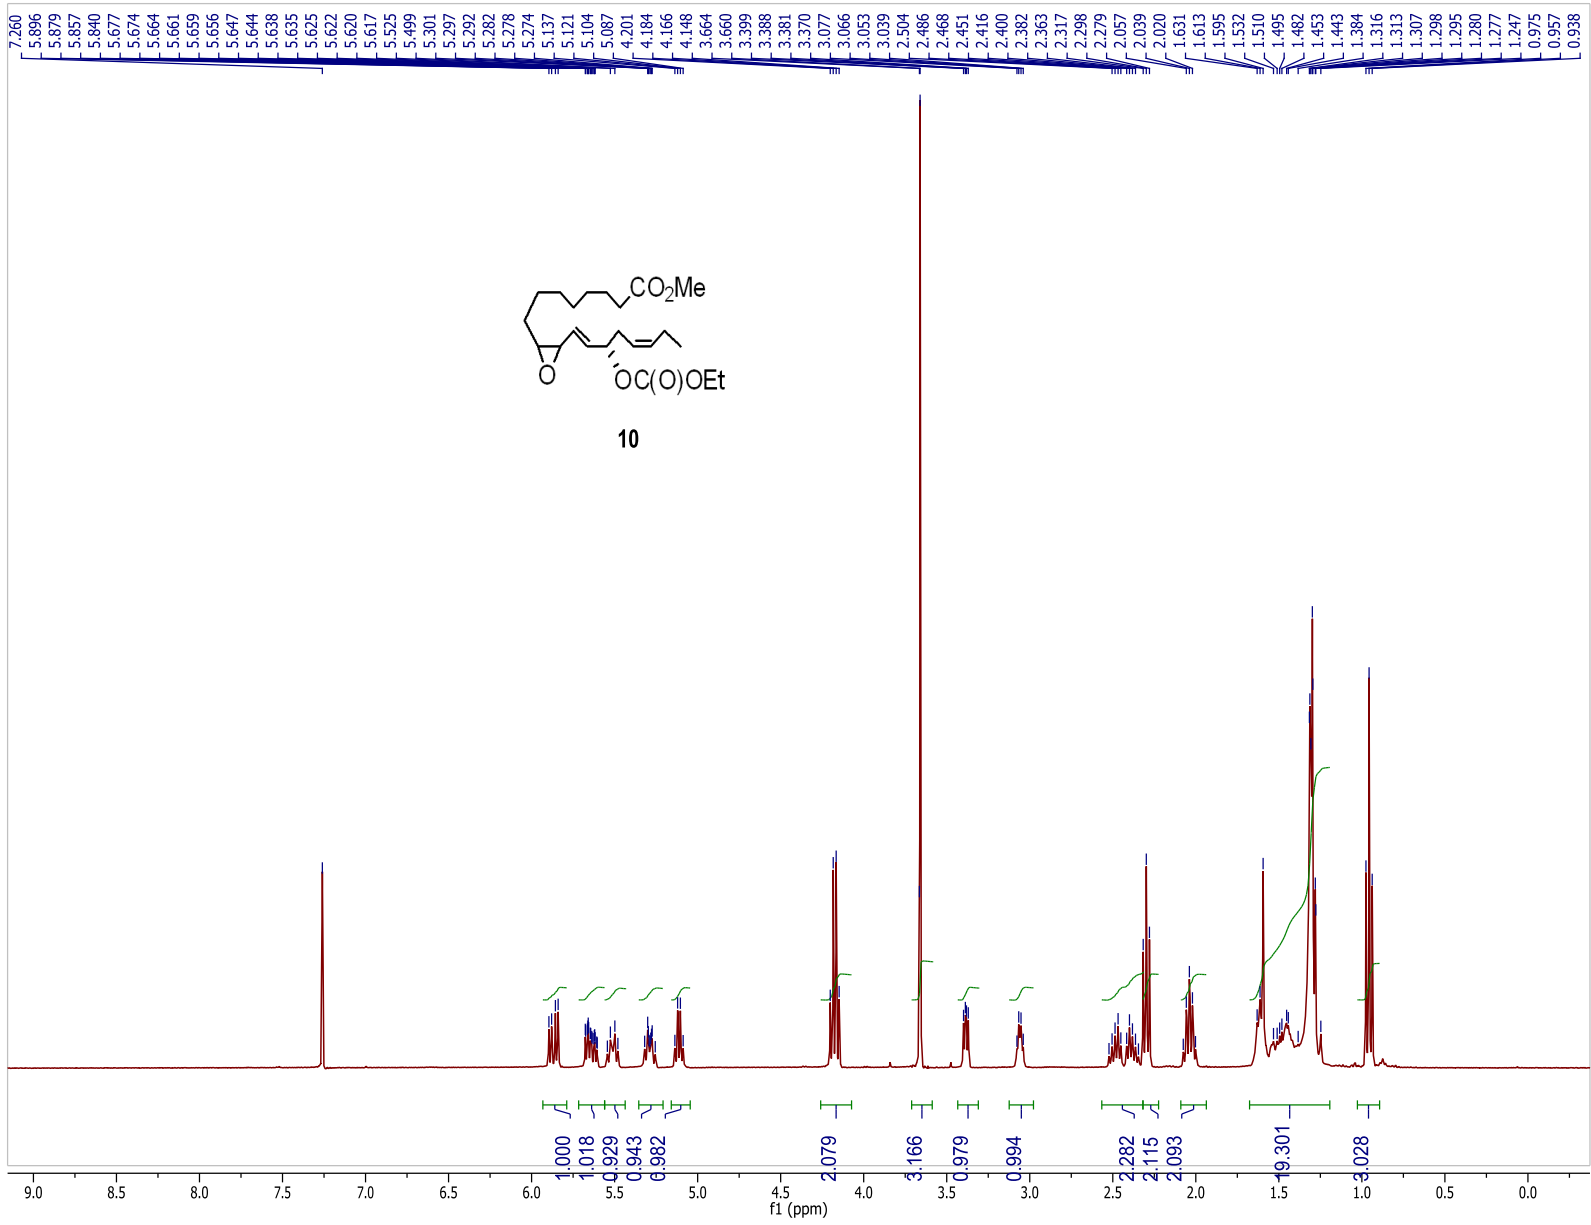

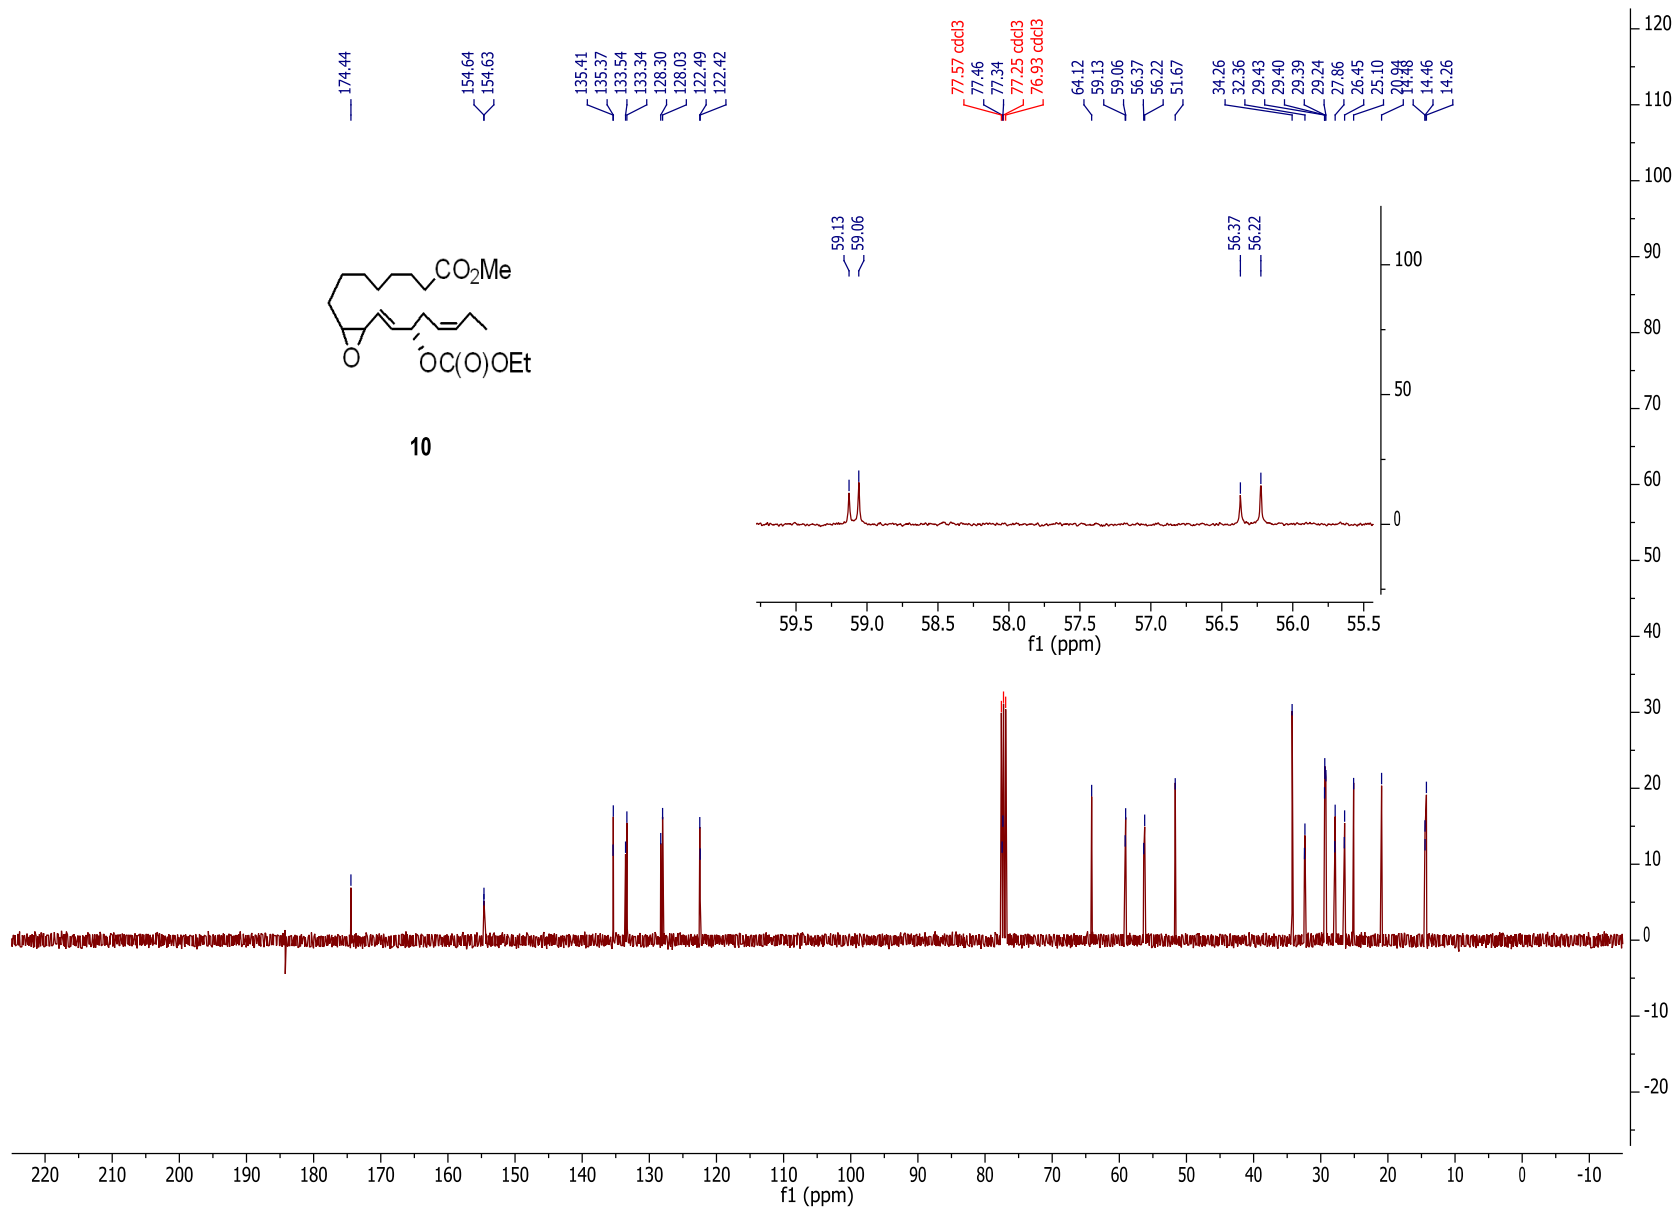

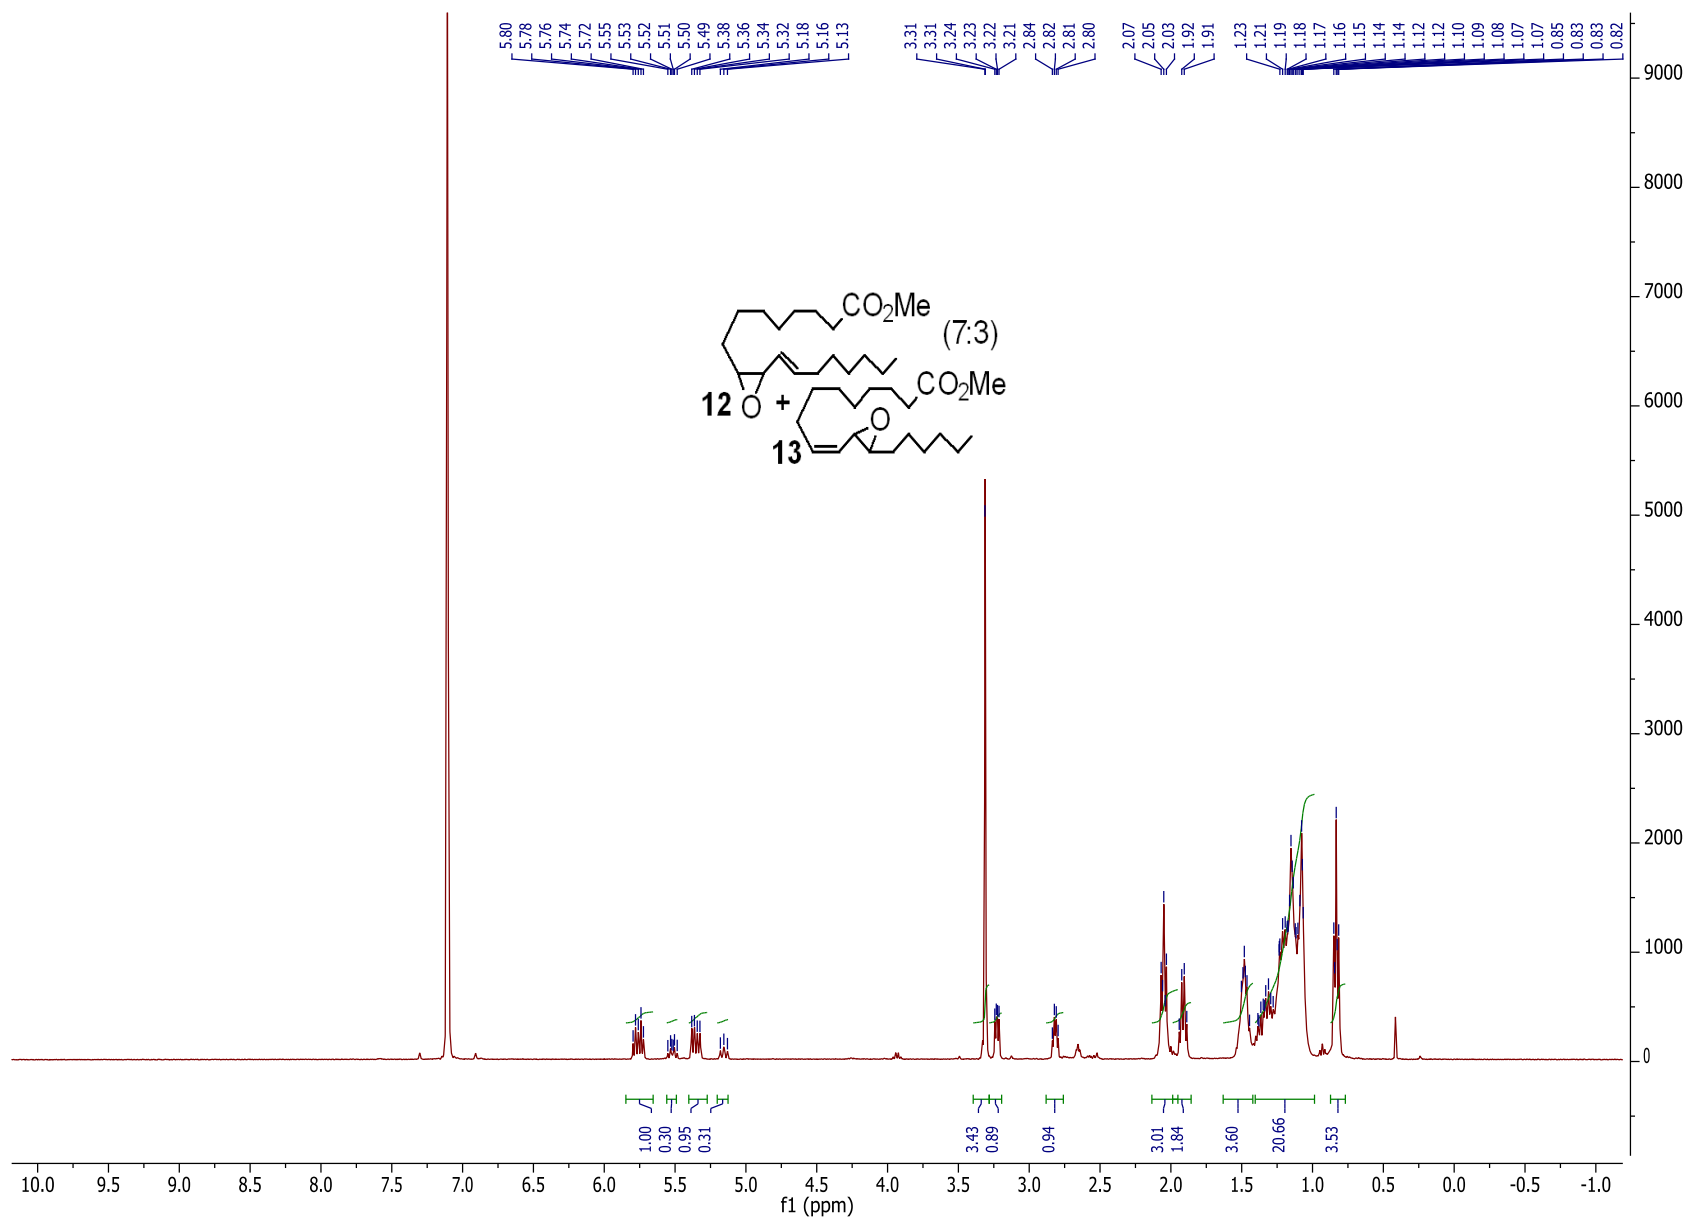

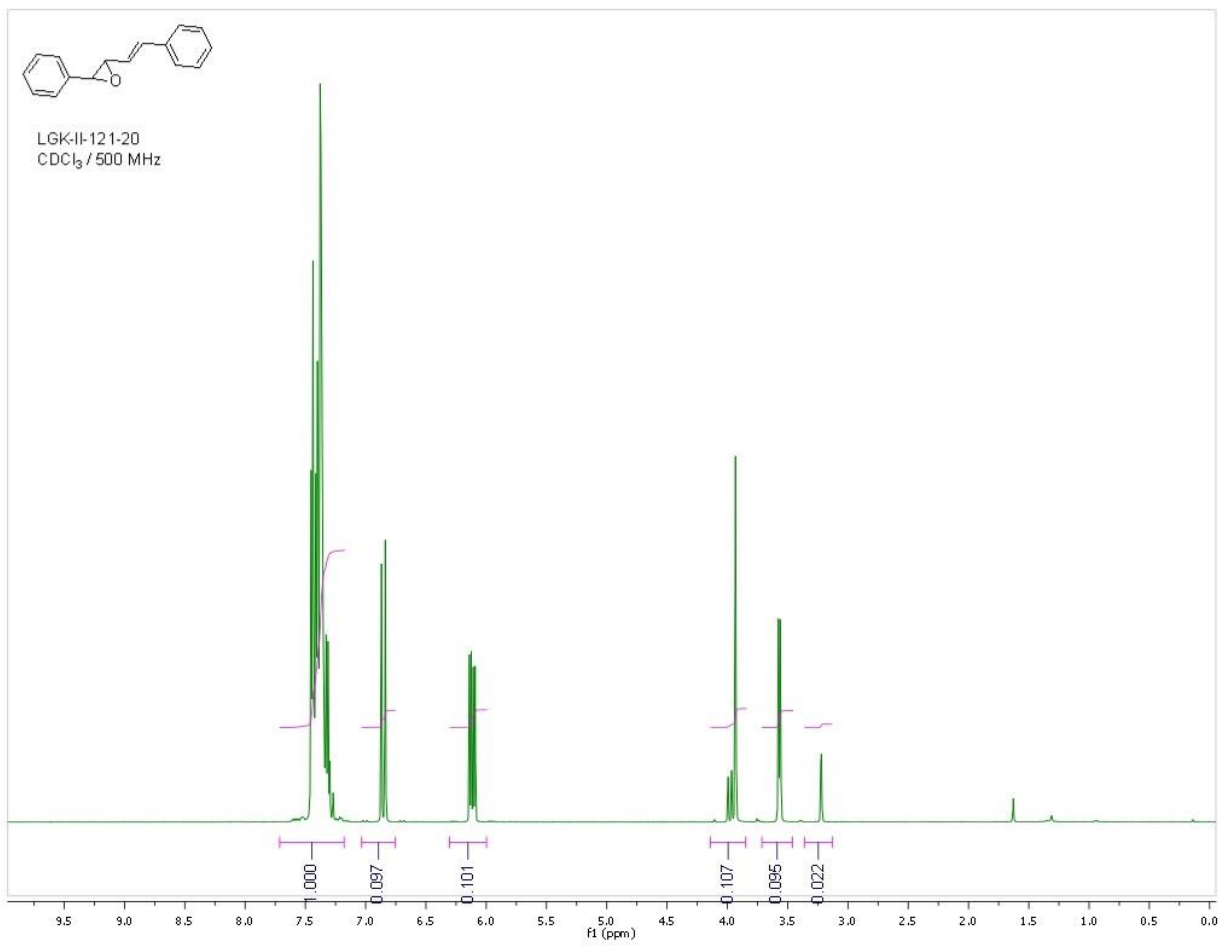

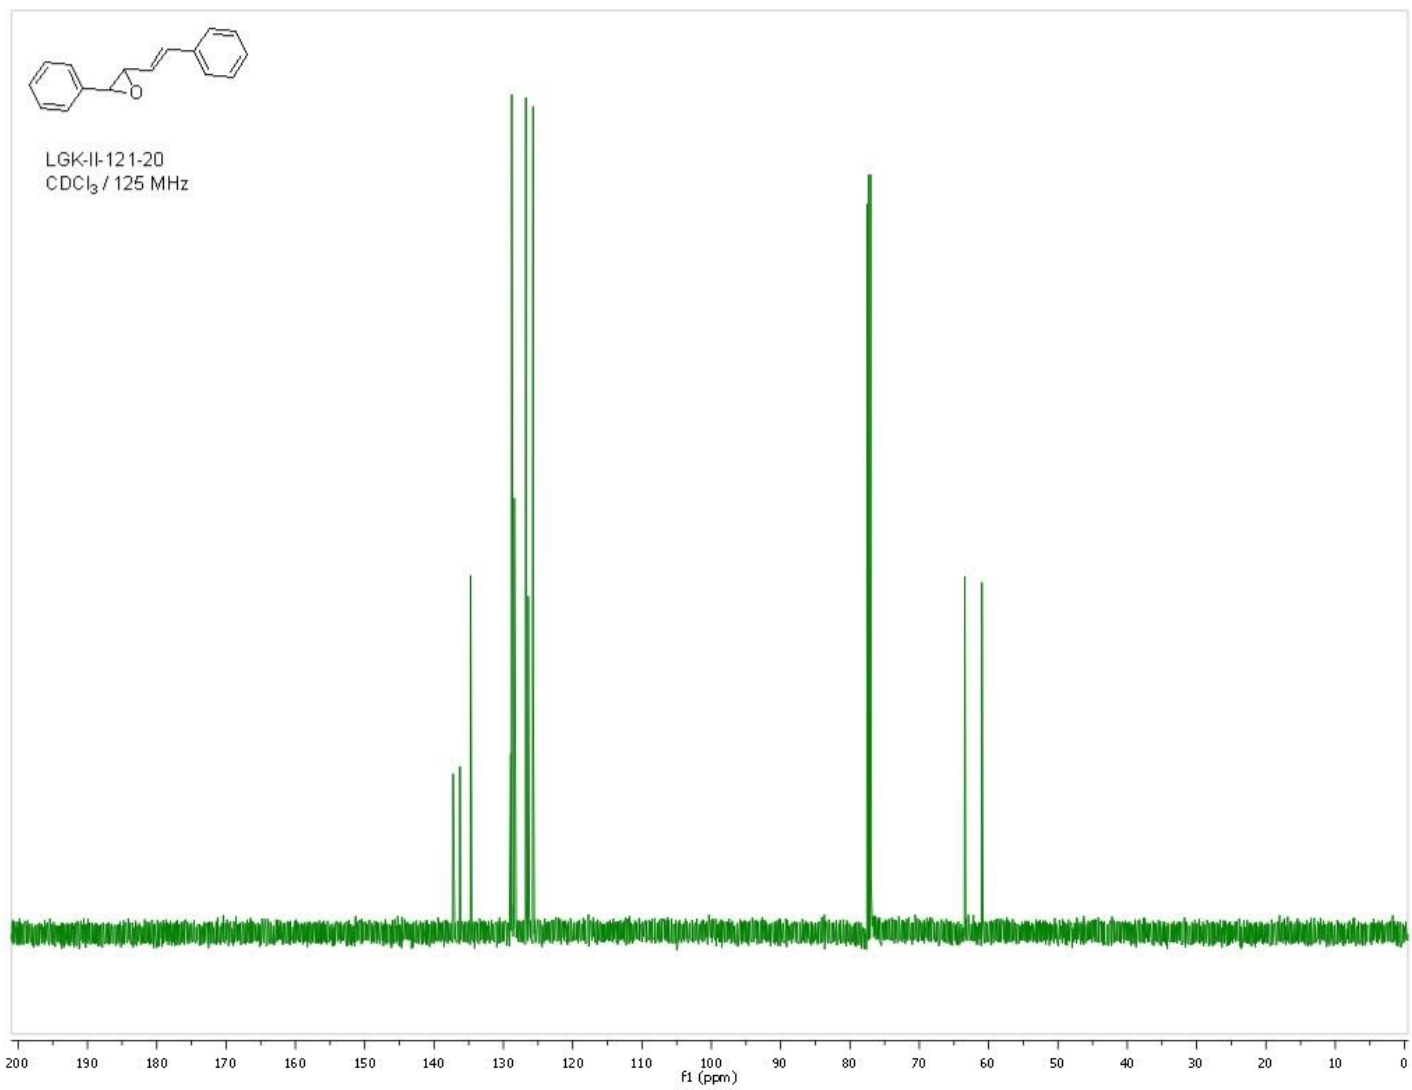

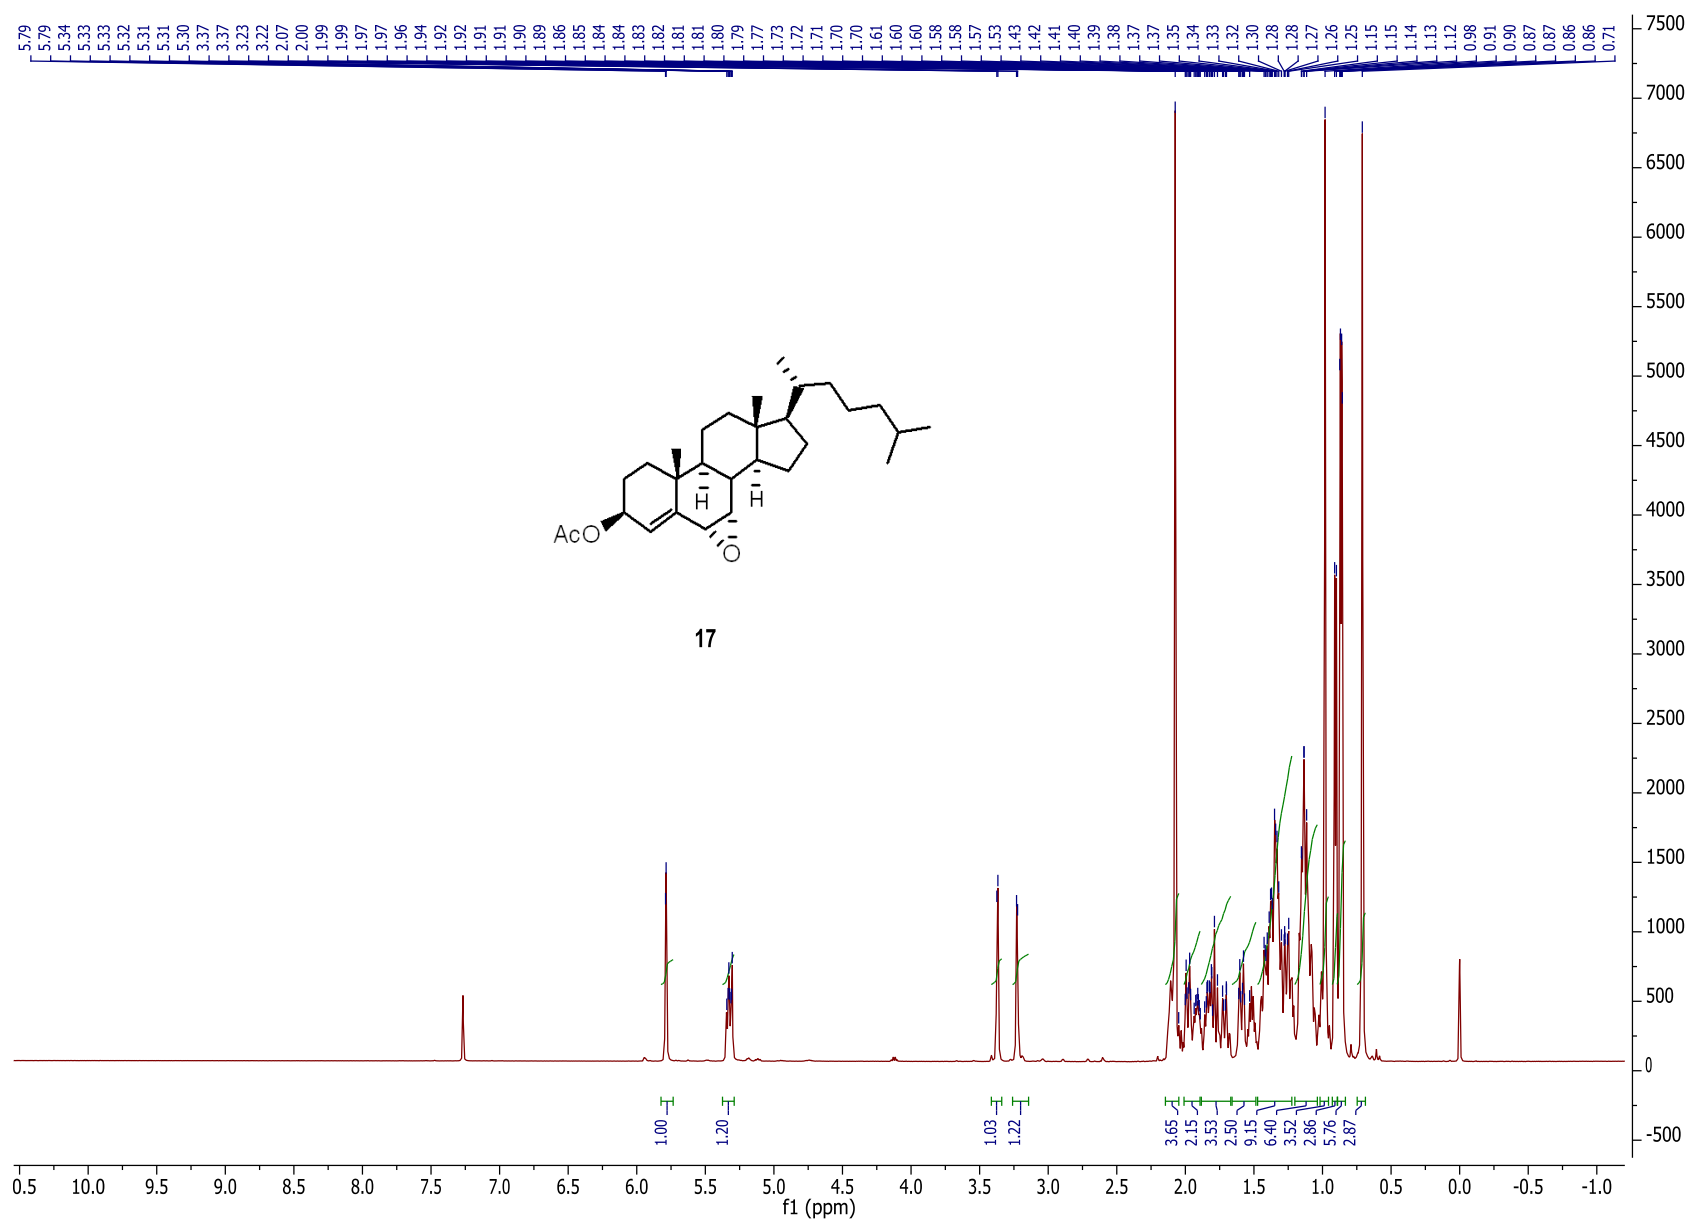

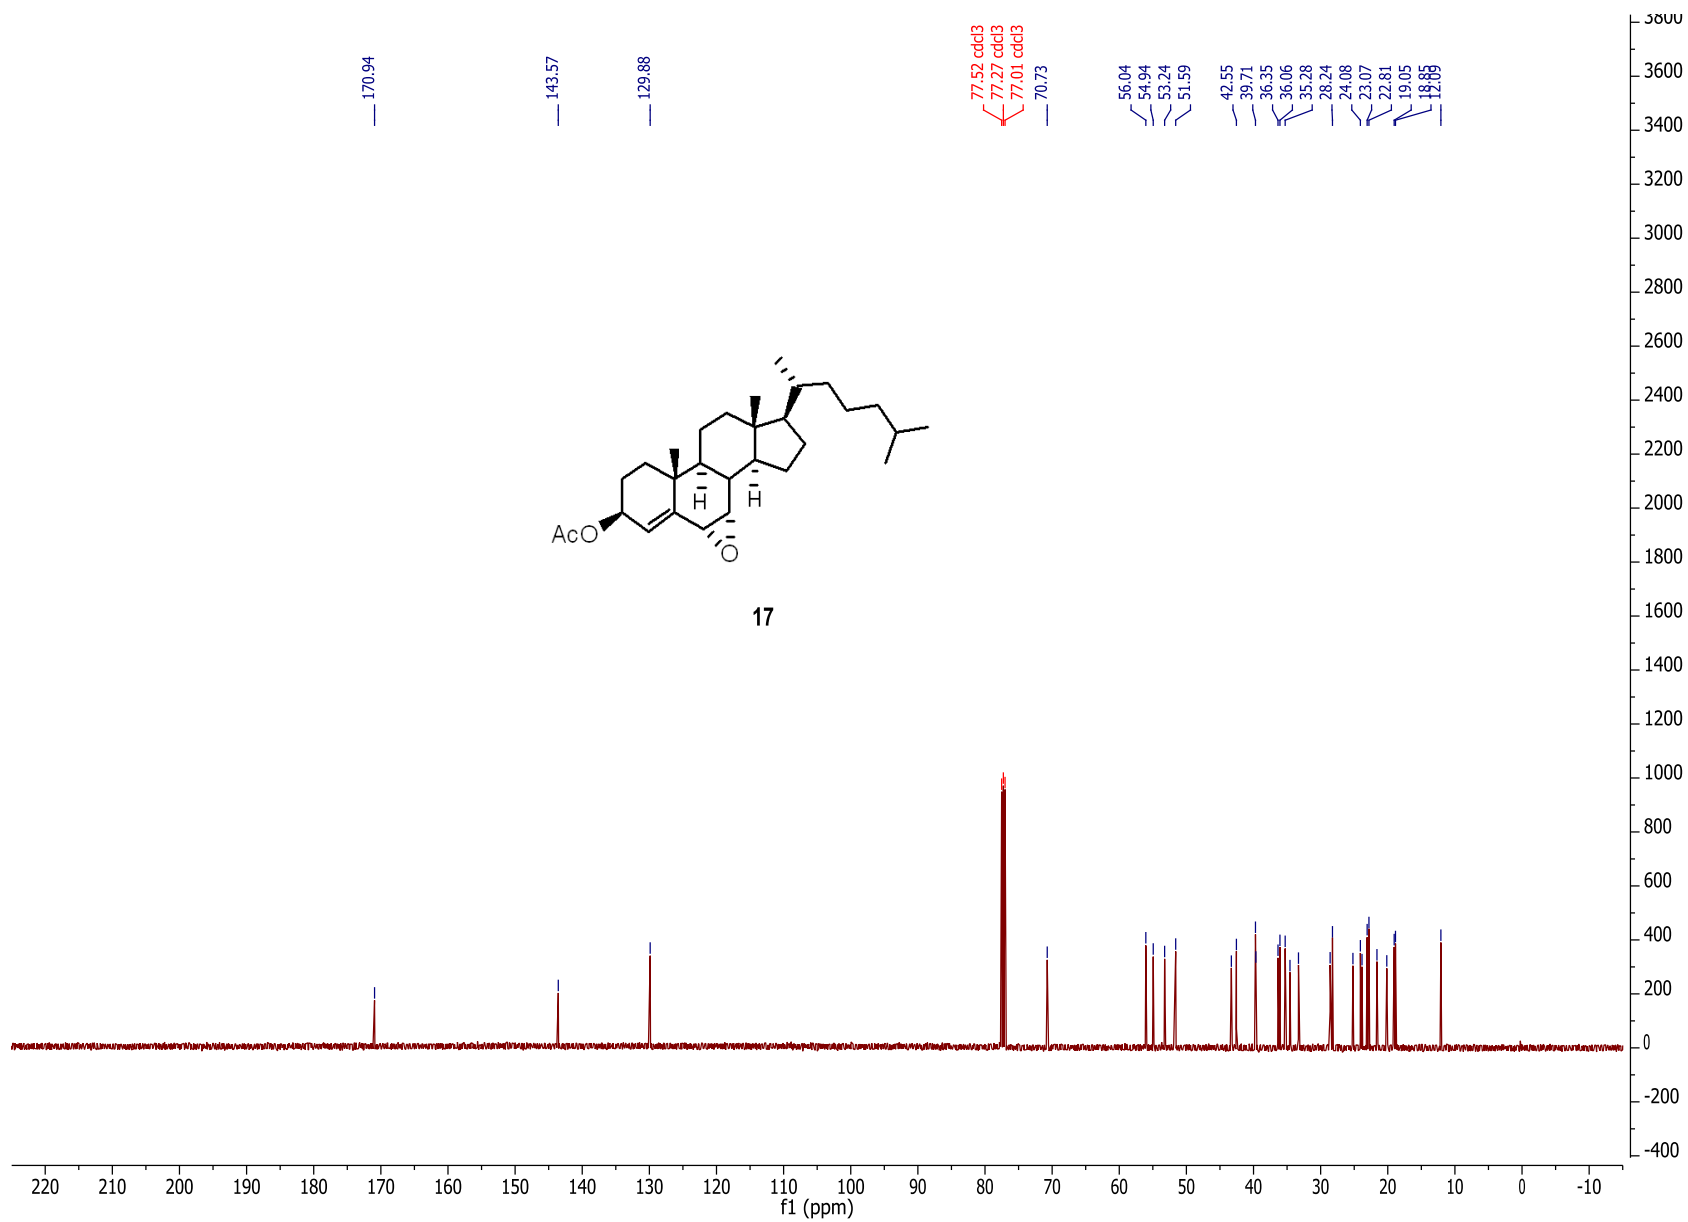



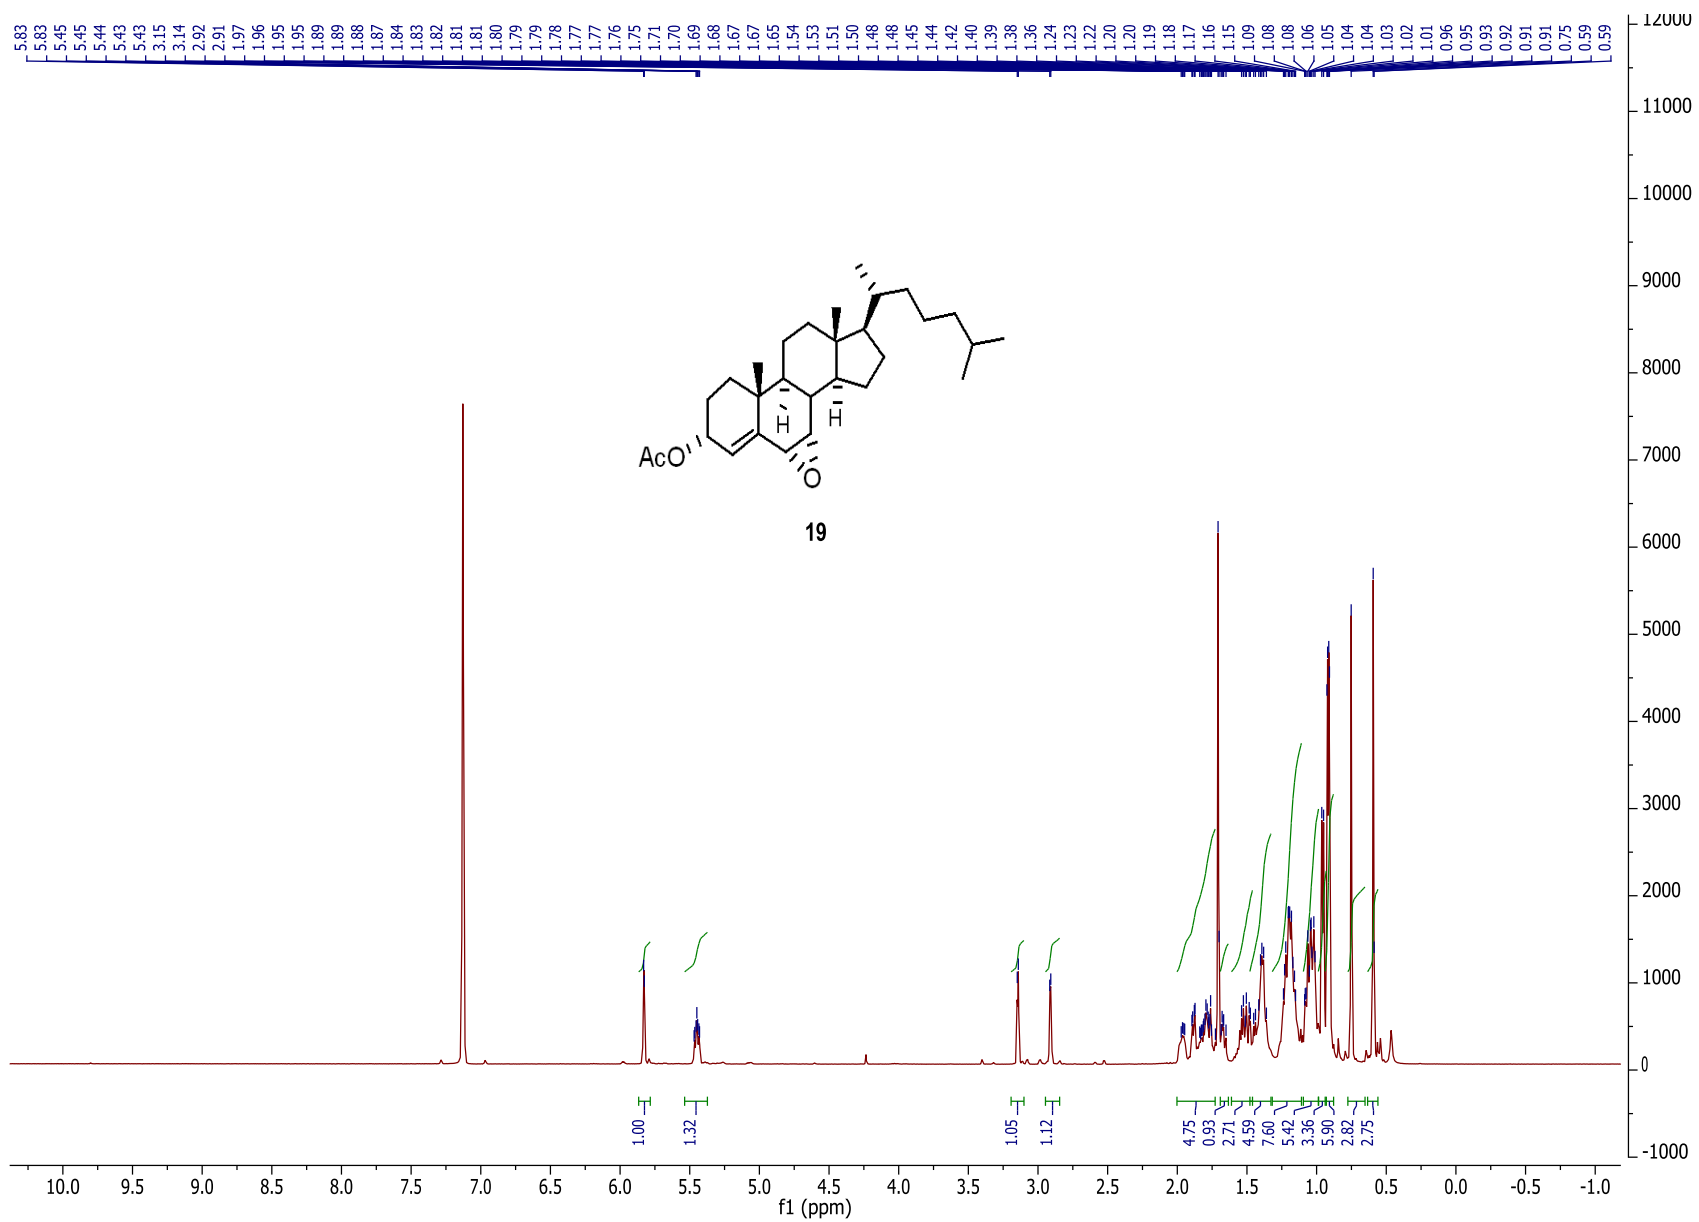

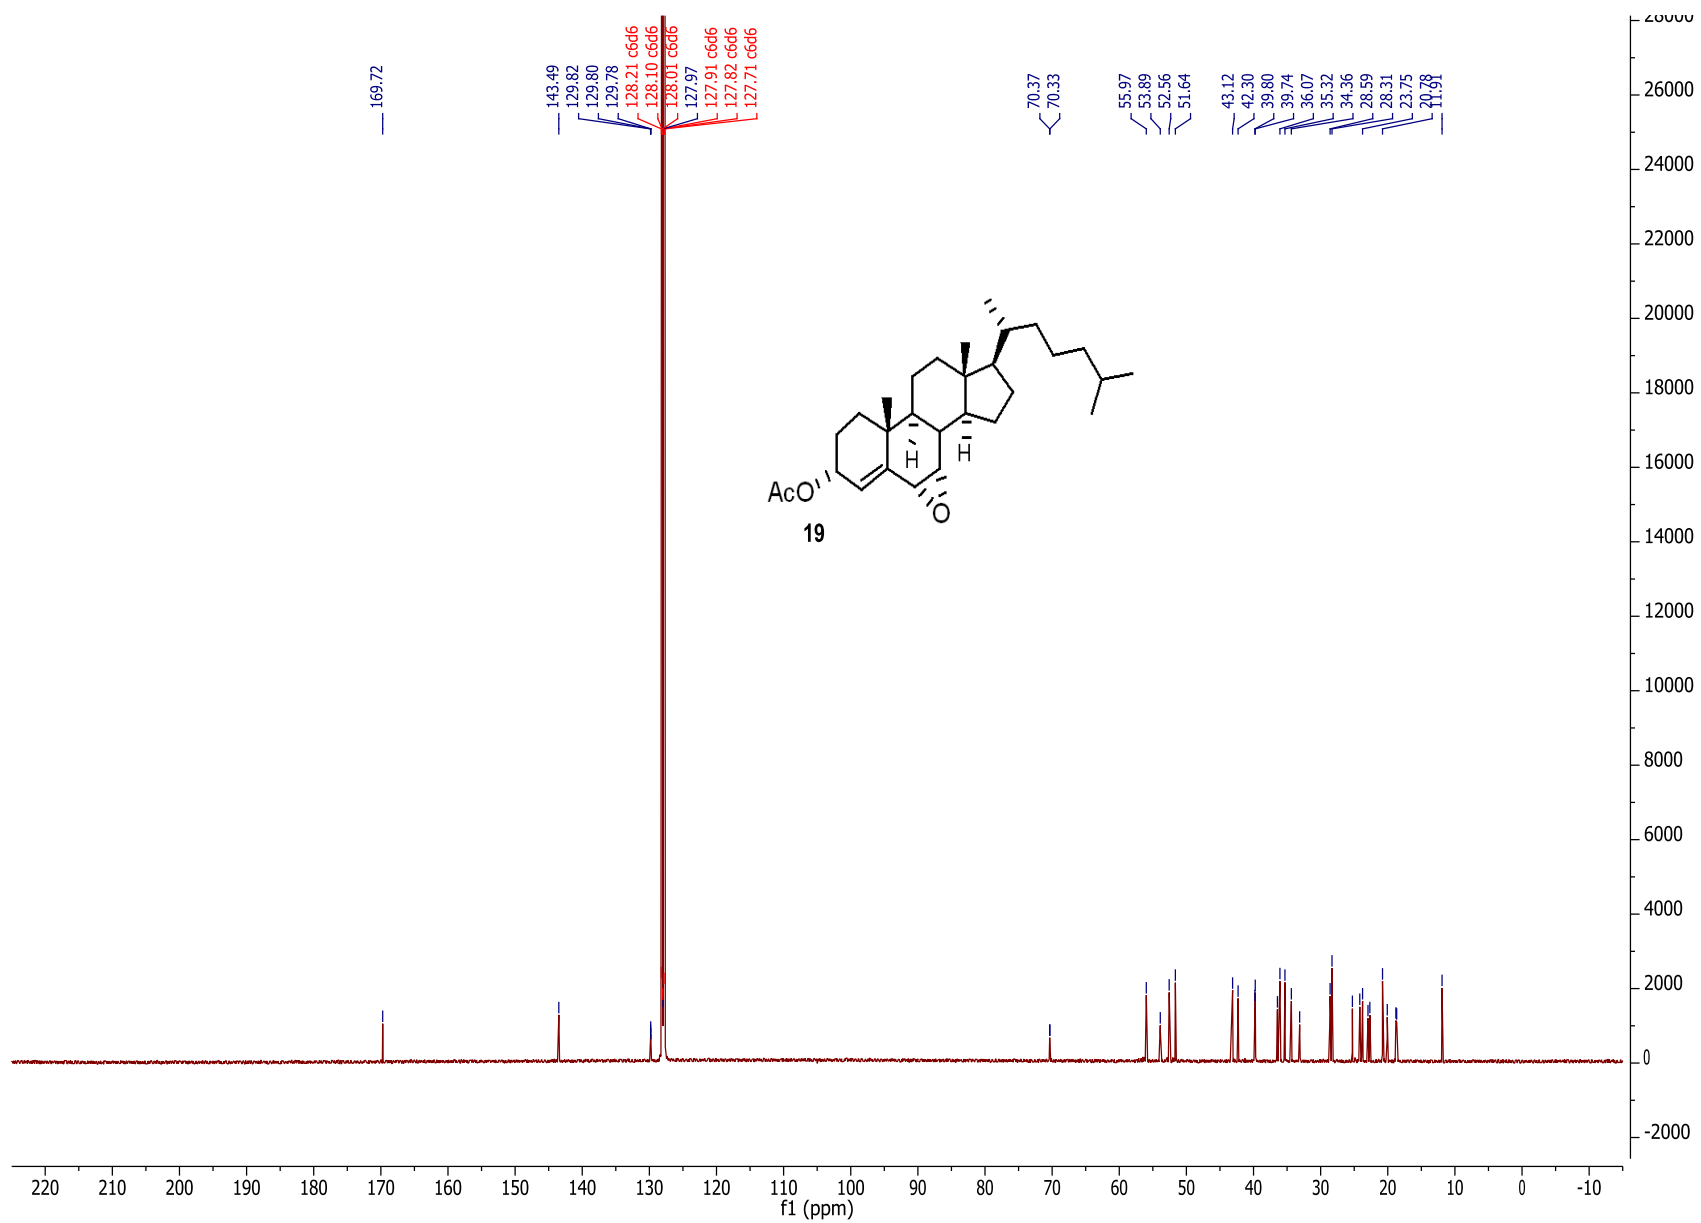

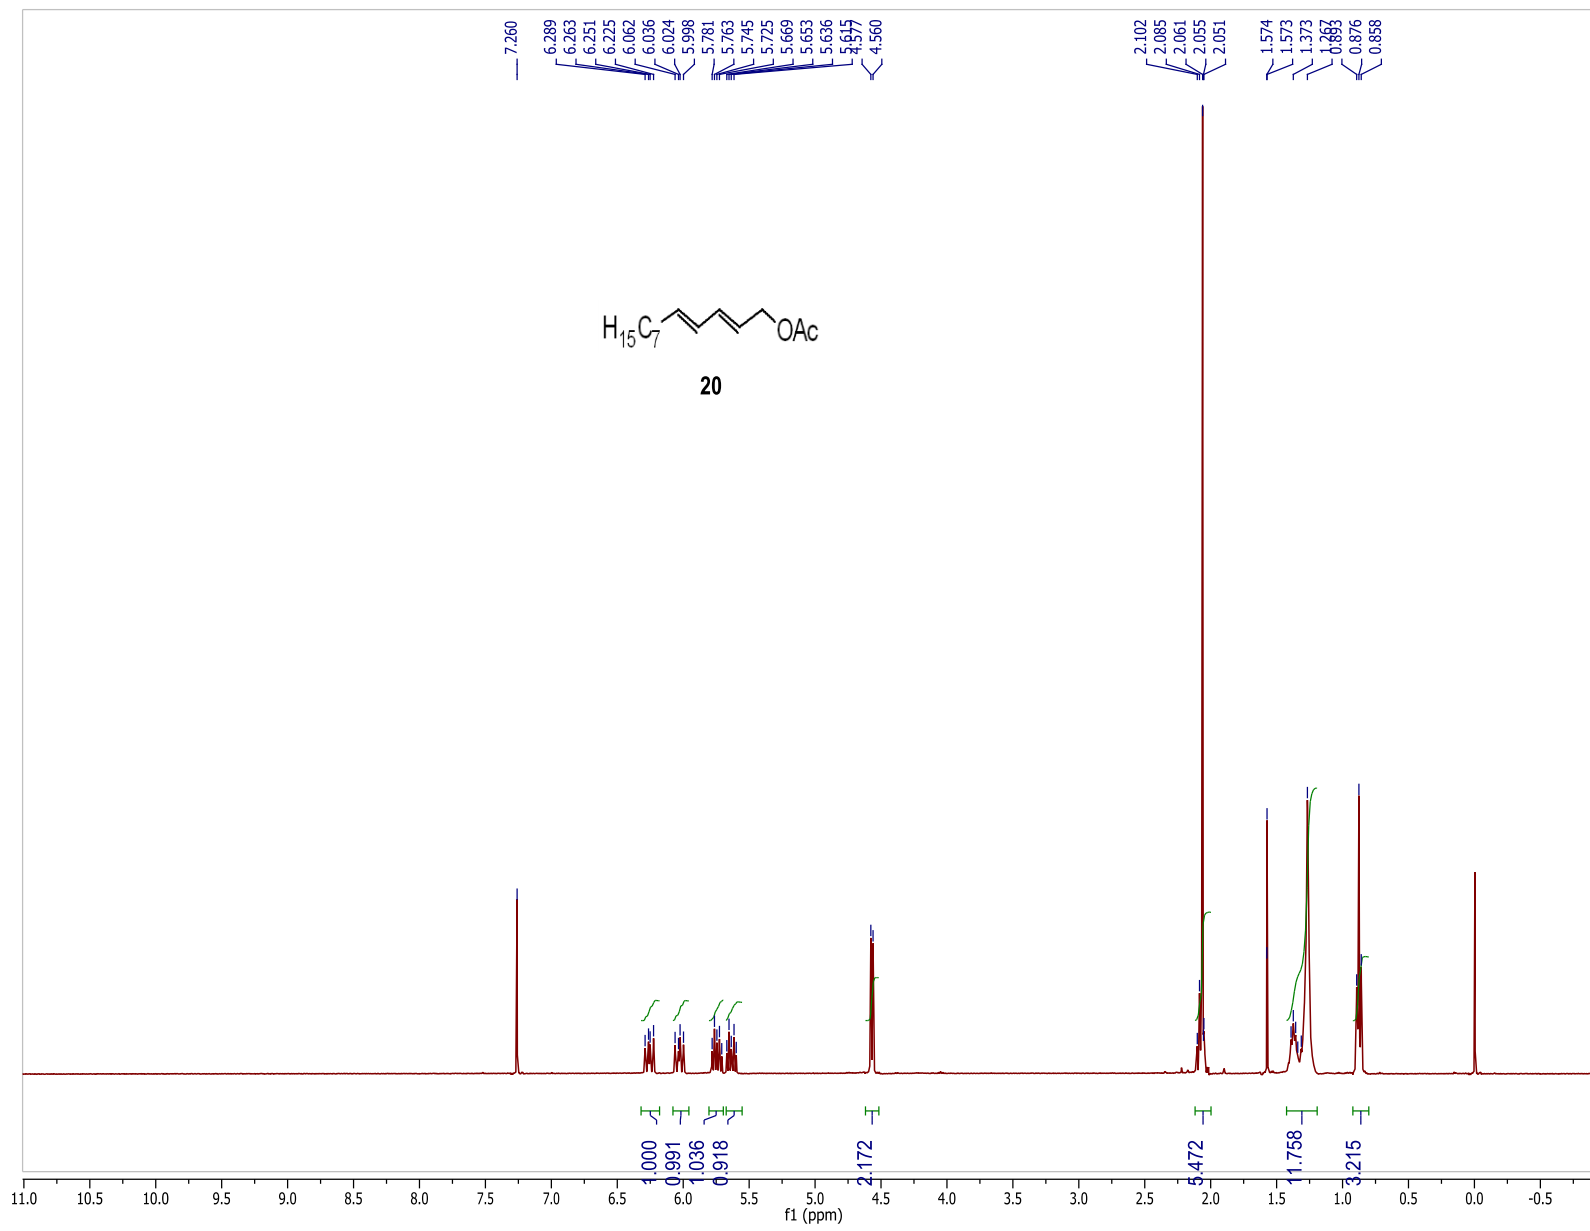

Std proton

expl Carbon

```
SAMPLE          SPECIAL
date May 18 2010 temp not used
solvent cdc13 gain 38
file exp spin not used
ACQUISITION hst 0.008
sw 24125.5 pps0 13.308
at 1.300 a1fa 10.000
np 62750
fb 13000 fl FLAGS
bs 25 fn n
dl 1.000 dp y
nt 100000 hs nn
ct 125 PROCESSING
TRANSMITTER lb 0.50
tn c13 fn not used
sfrq 100.535 DISPLAY
tof 1042.6 sp -209.2
tpwr 52 wp 19813.7
pw 6.350 rfl 3288.2
DECOUPLER rfp 7764.2
dn H1 rp 113.4
dof 0 lp -156.7
dm yyy PLOT
dmm w wc 250
dpmr 40 sc e
dmf 9200 vs 9473
a1 cdc ph 14
```

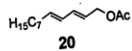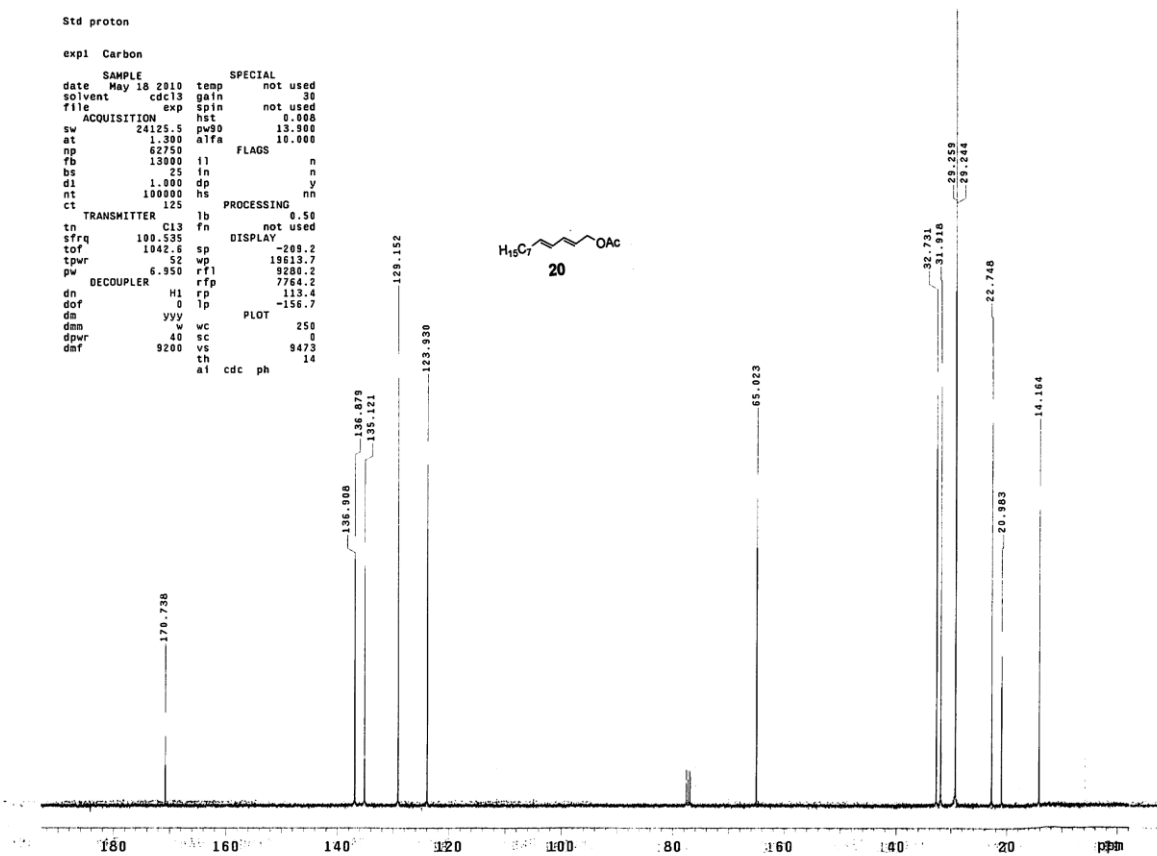

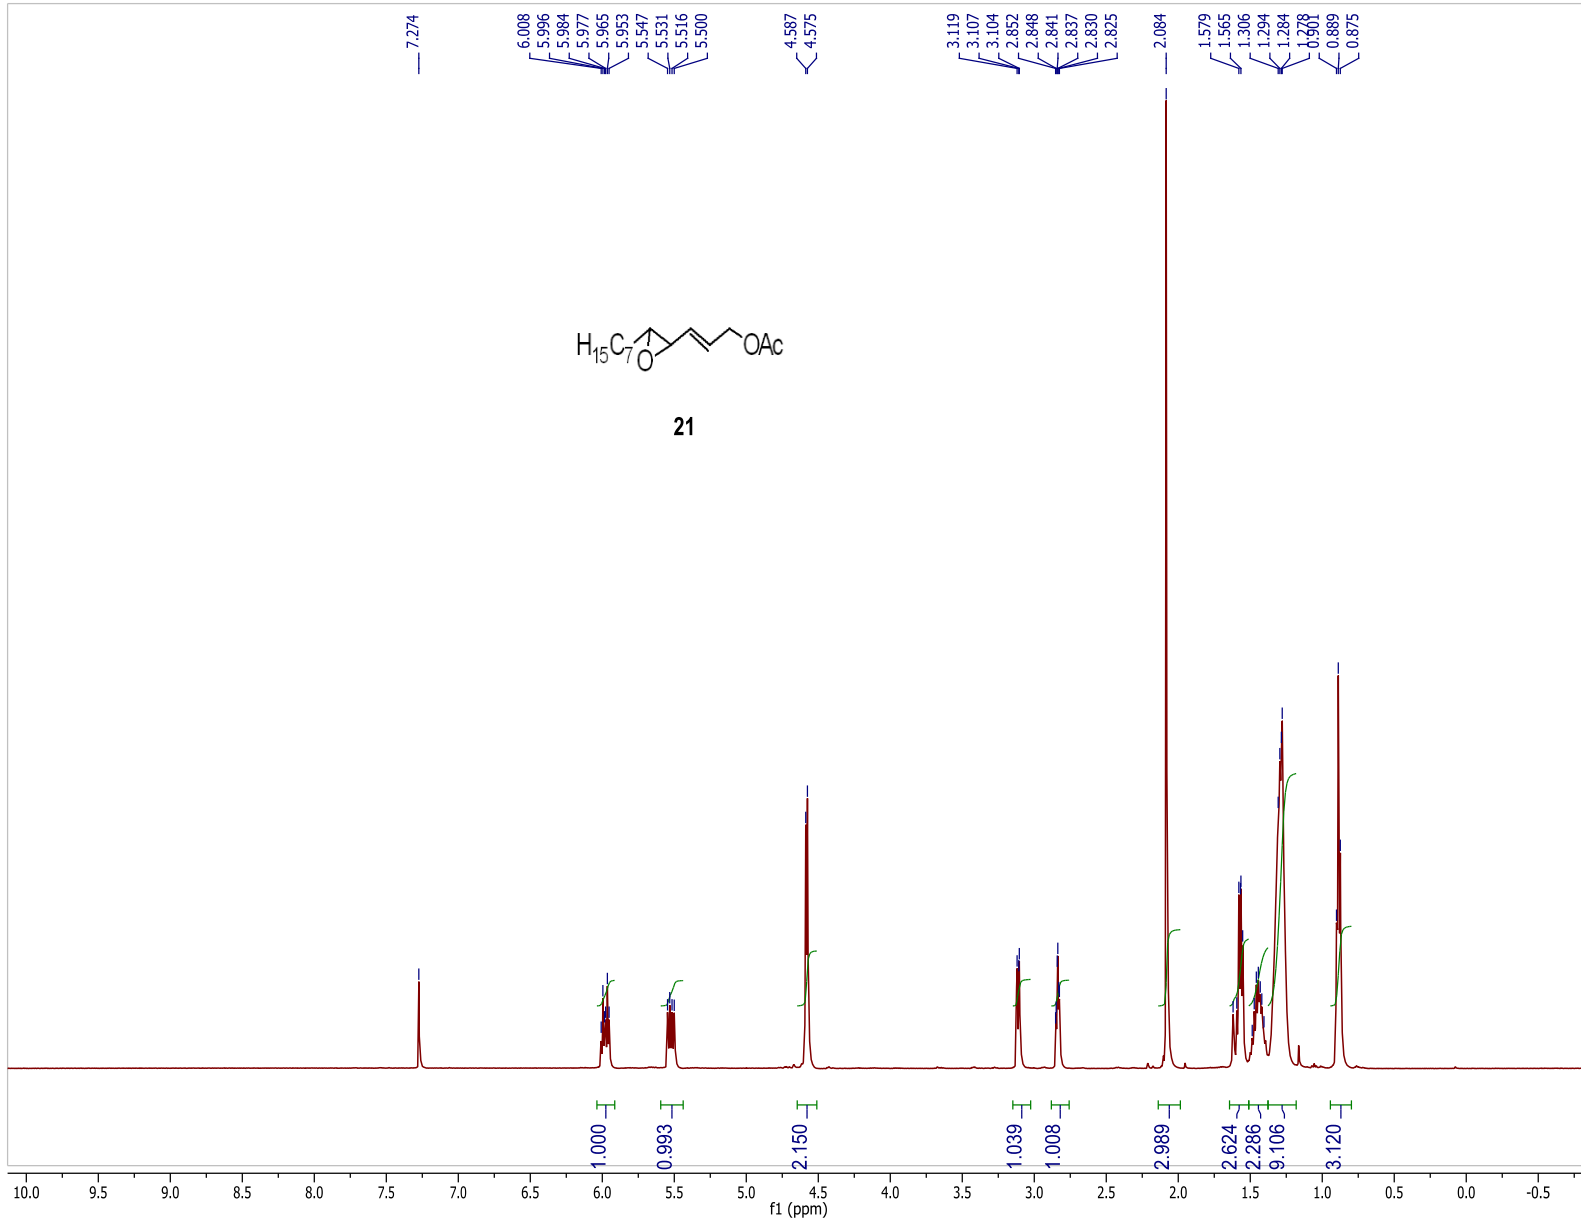

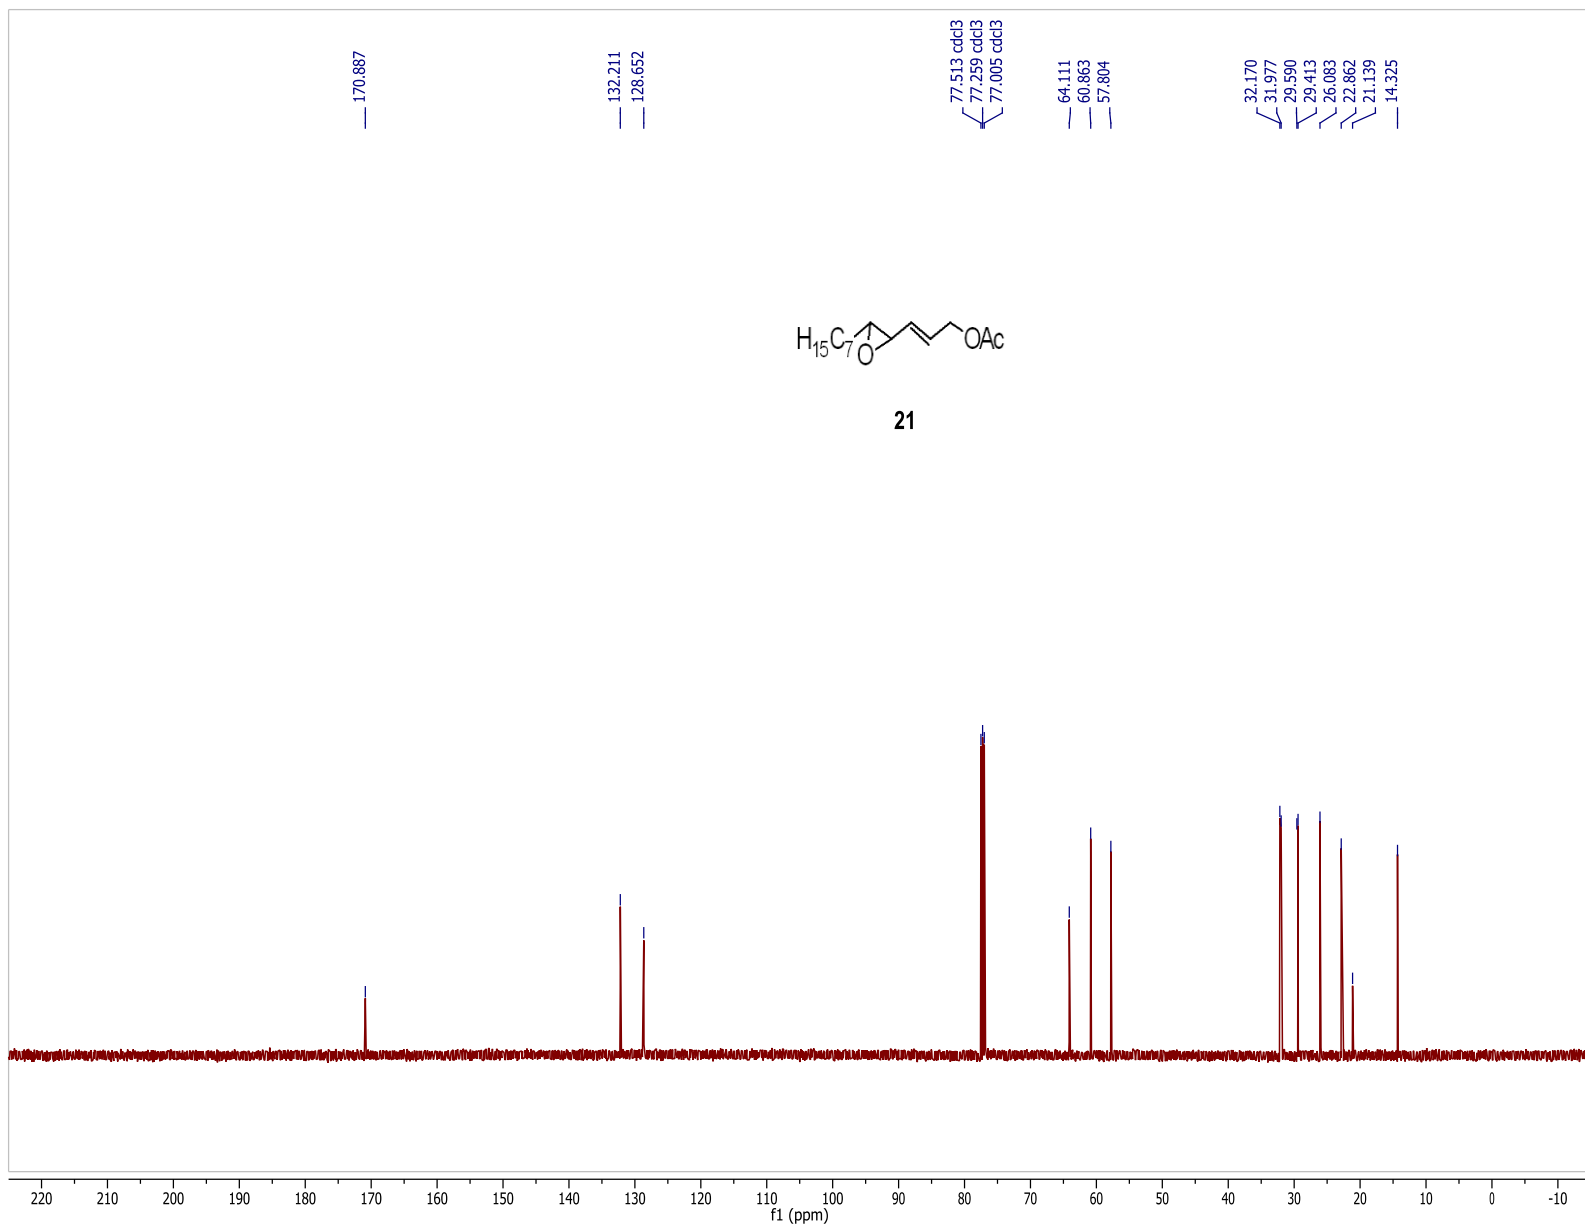

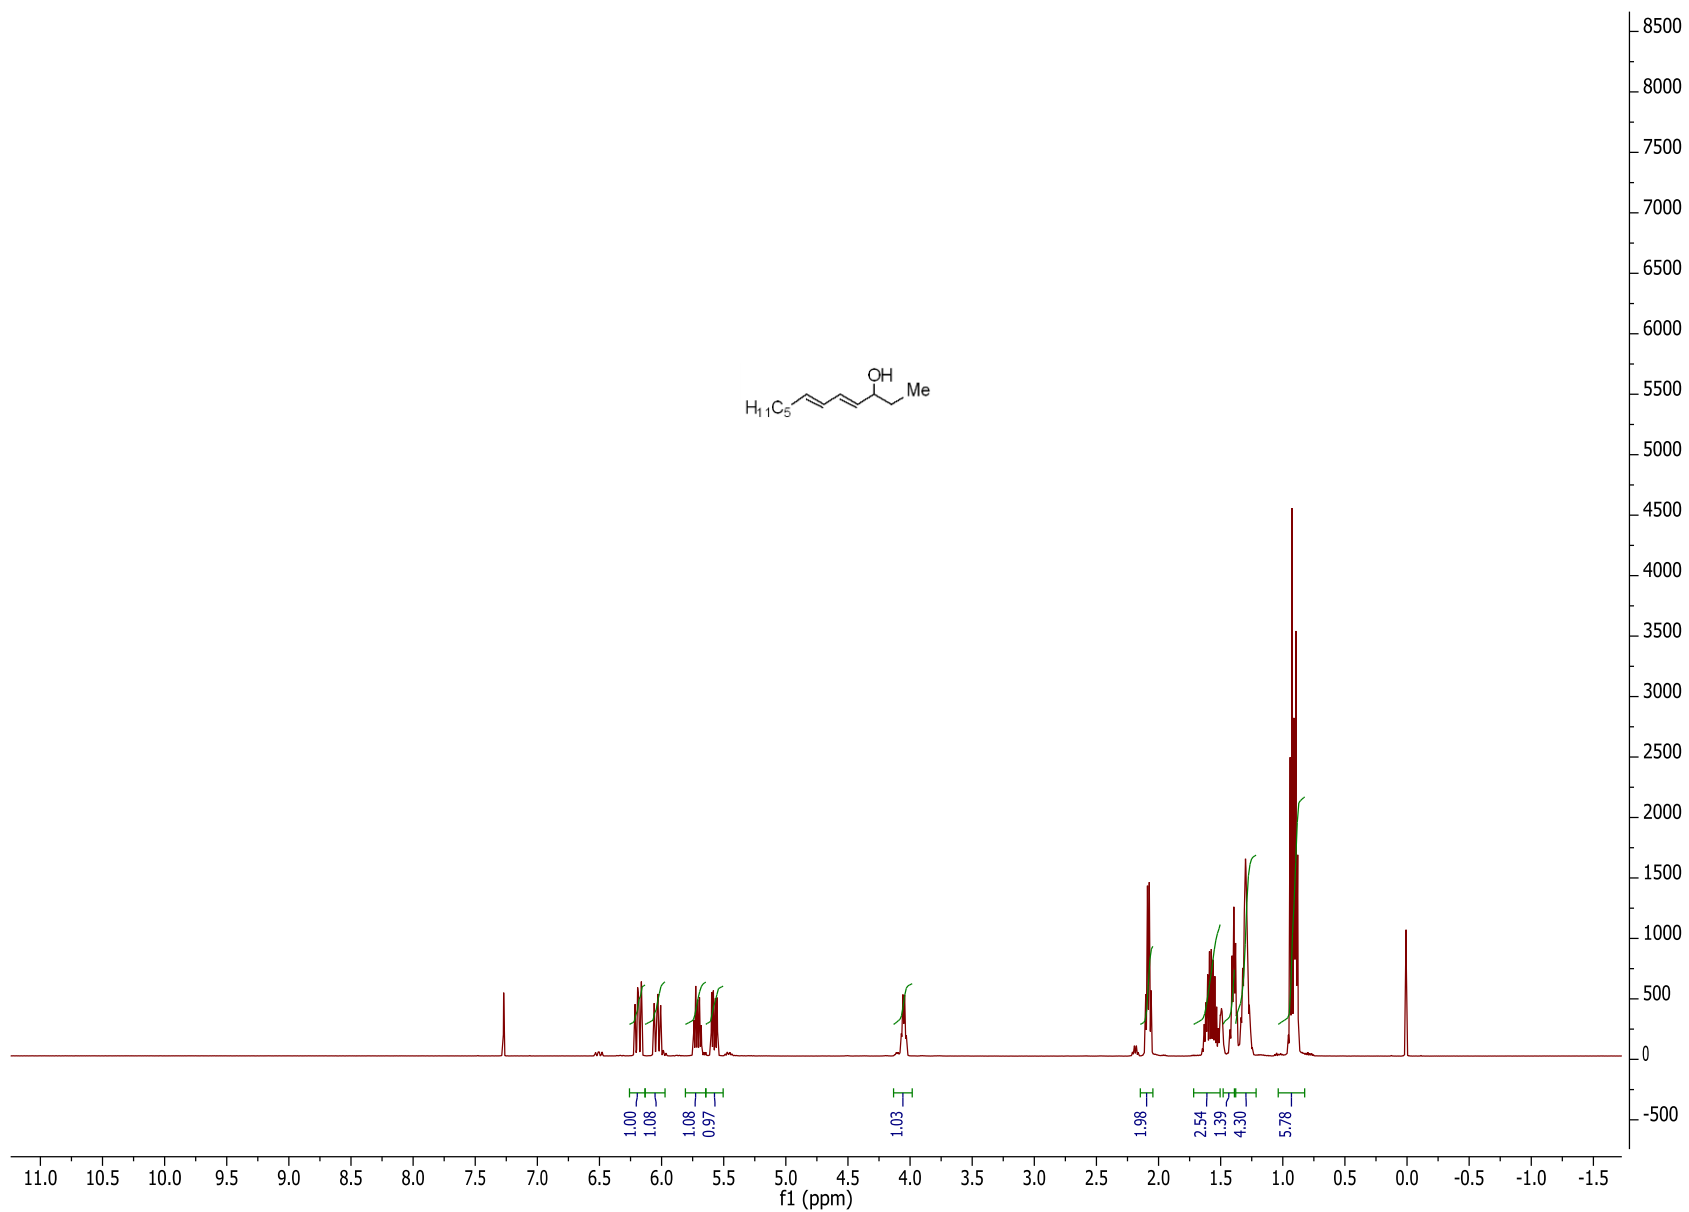

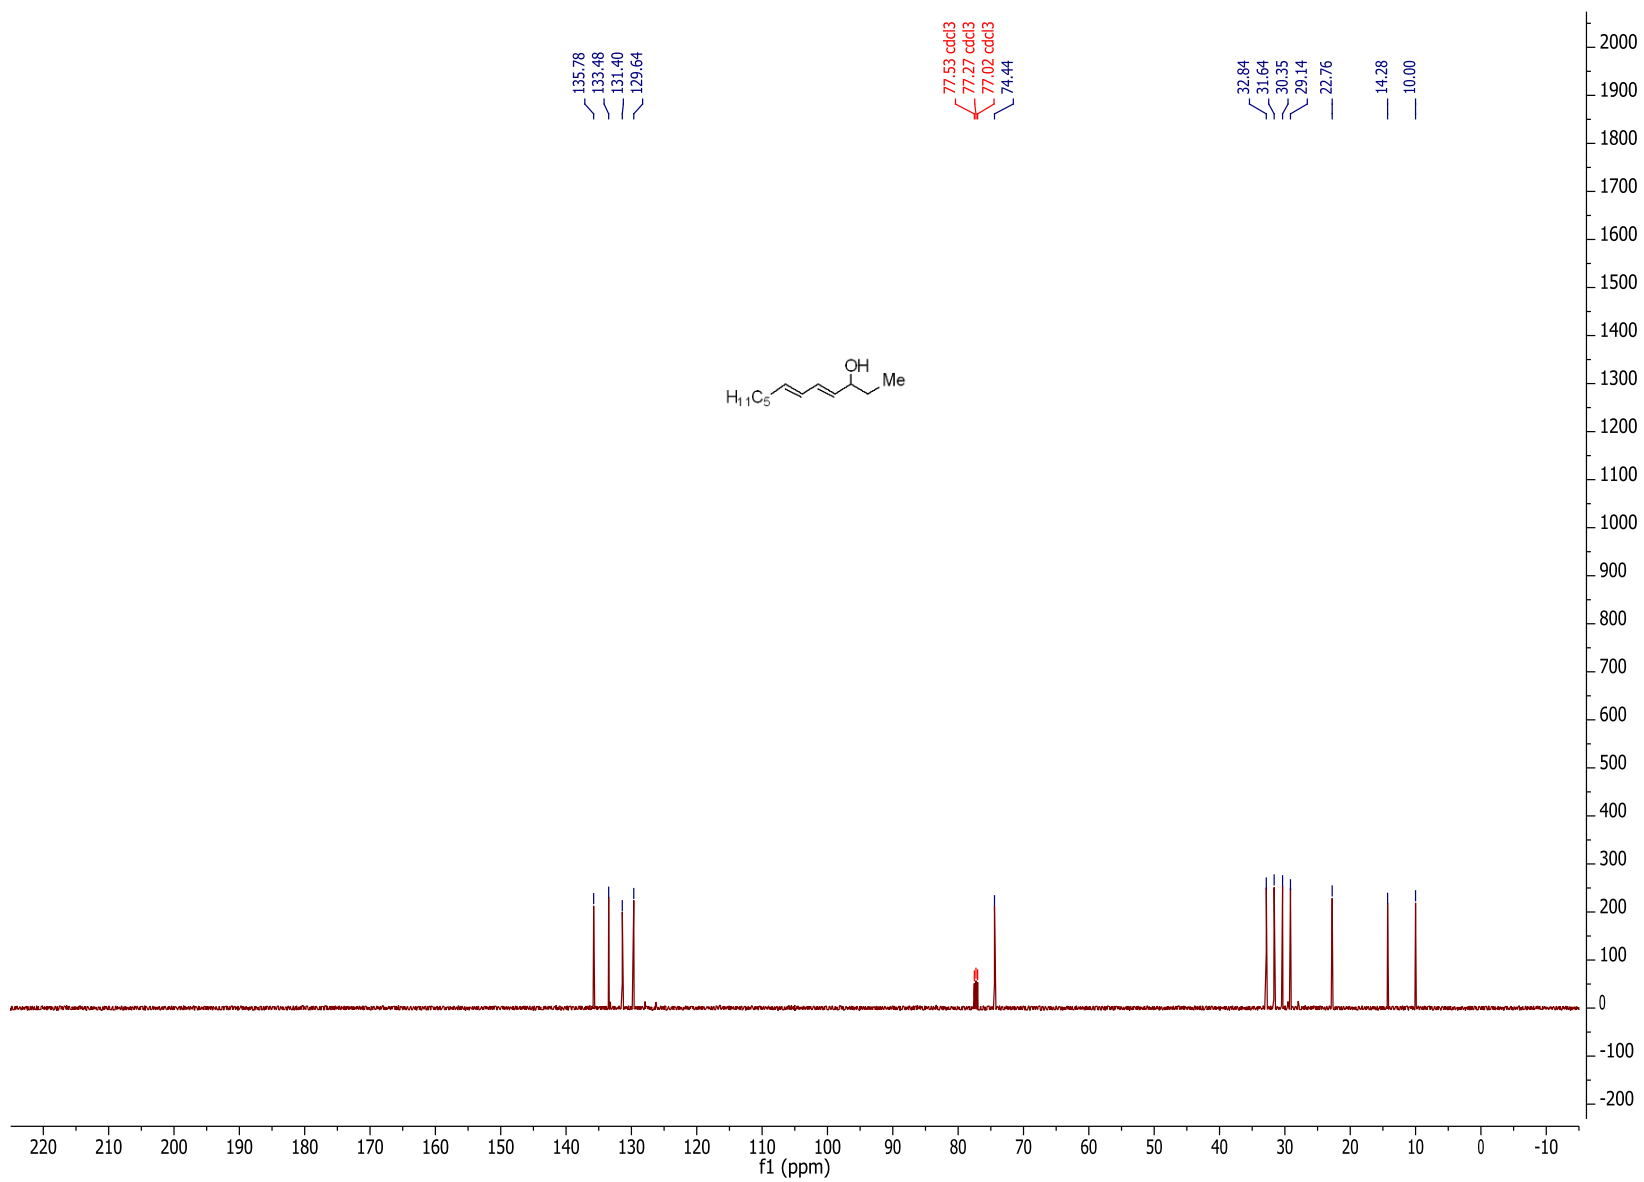



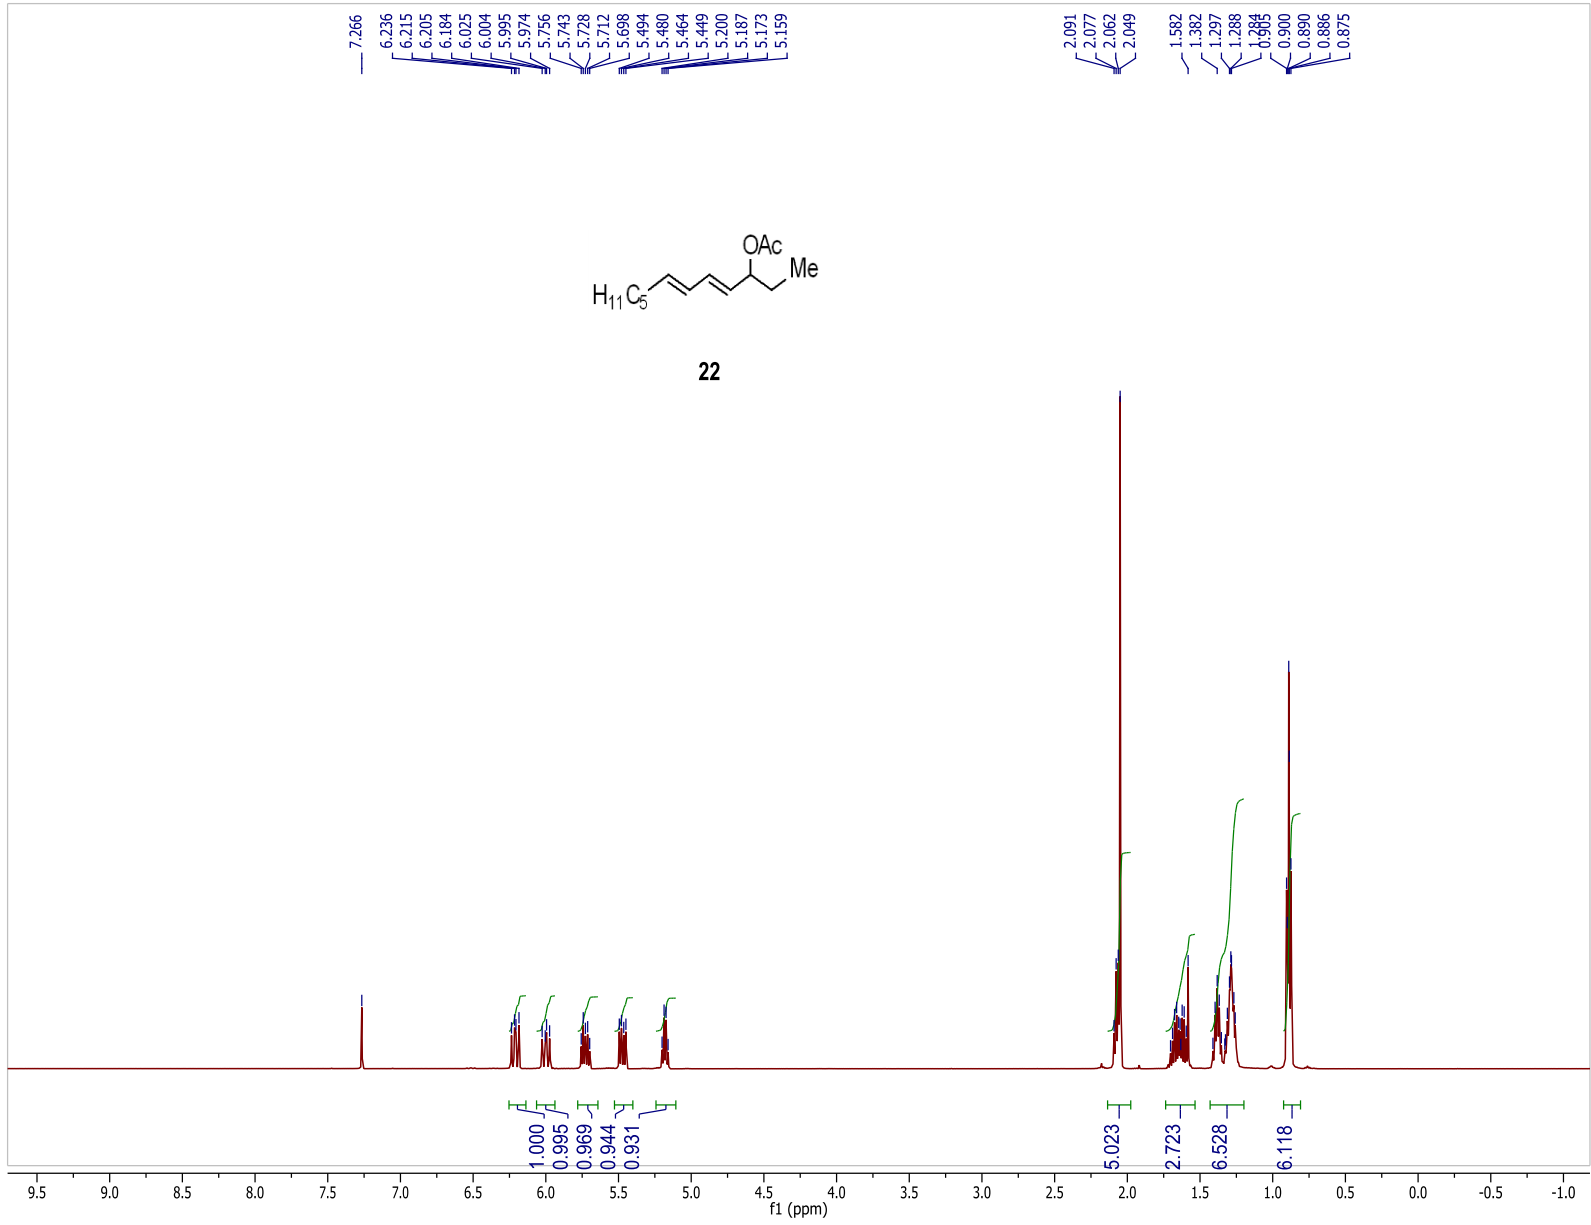

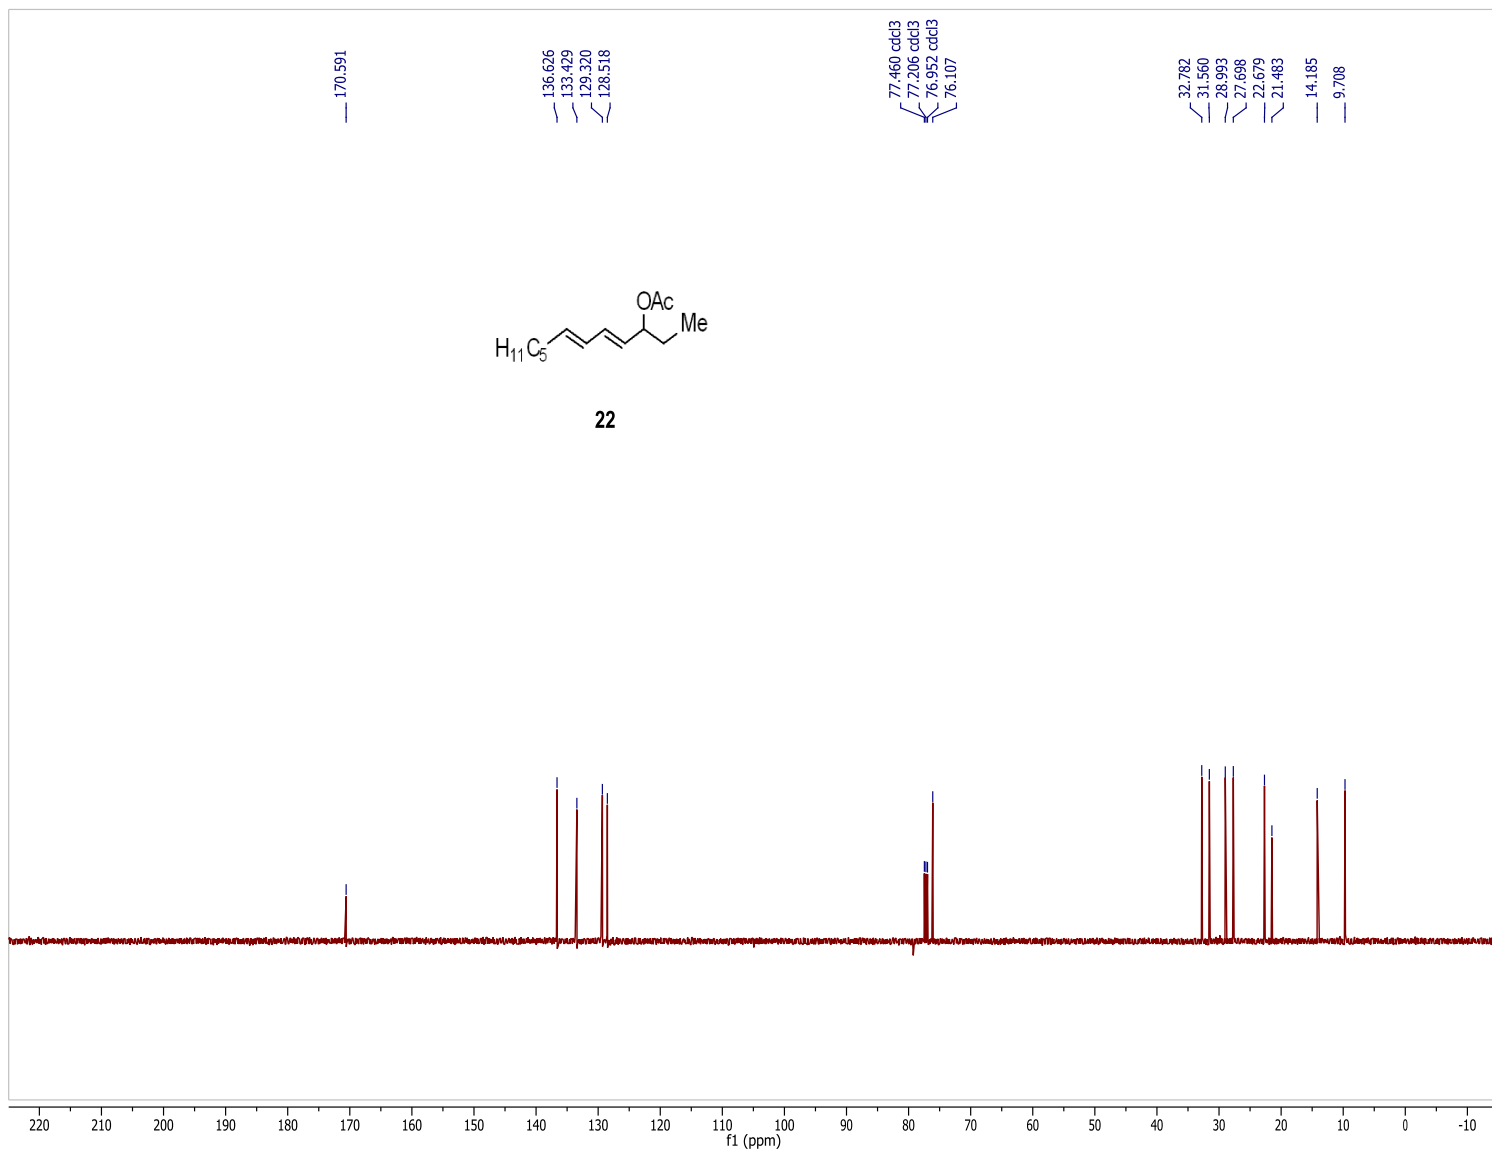

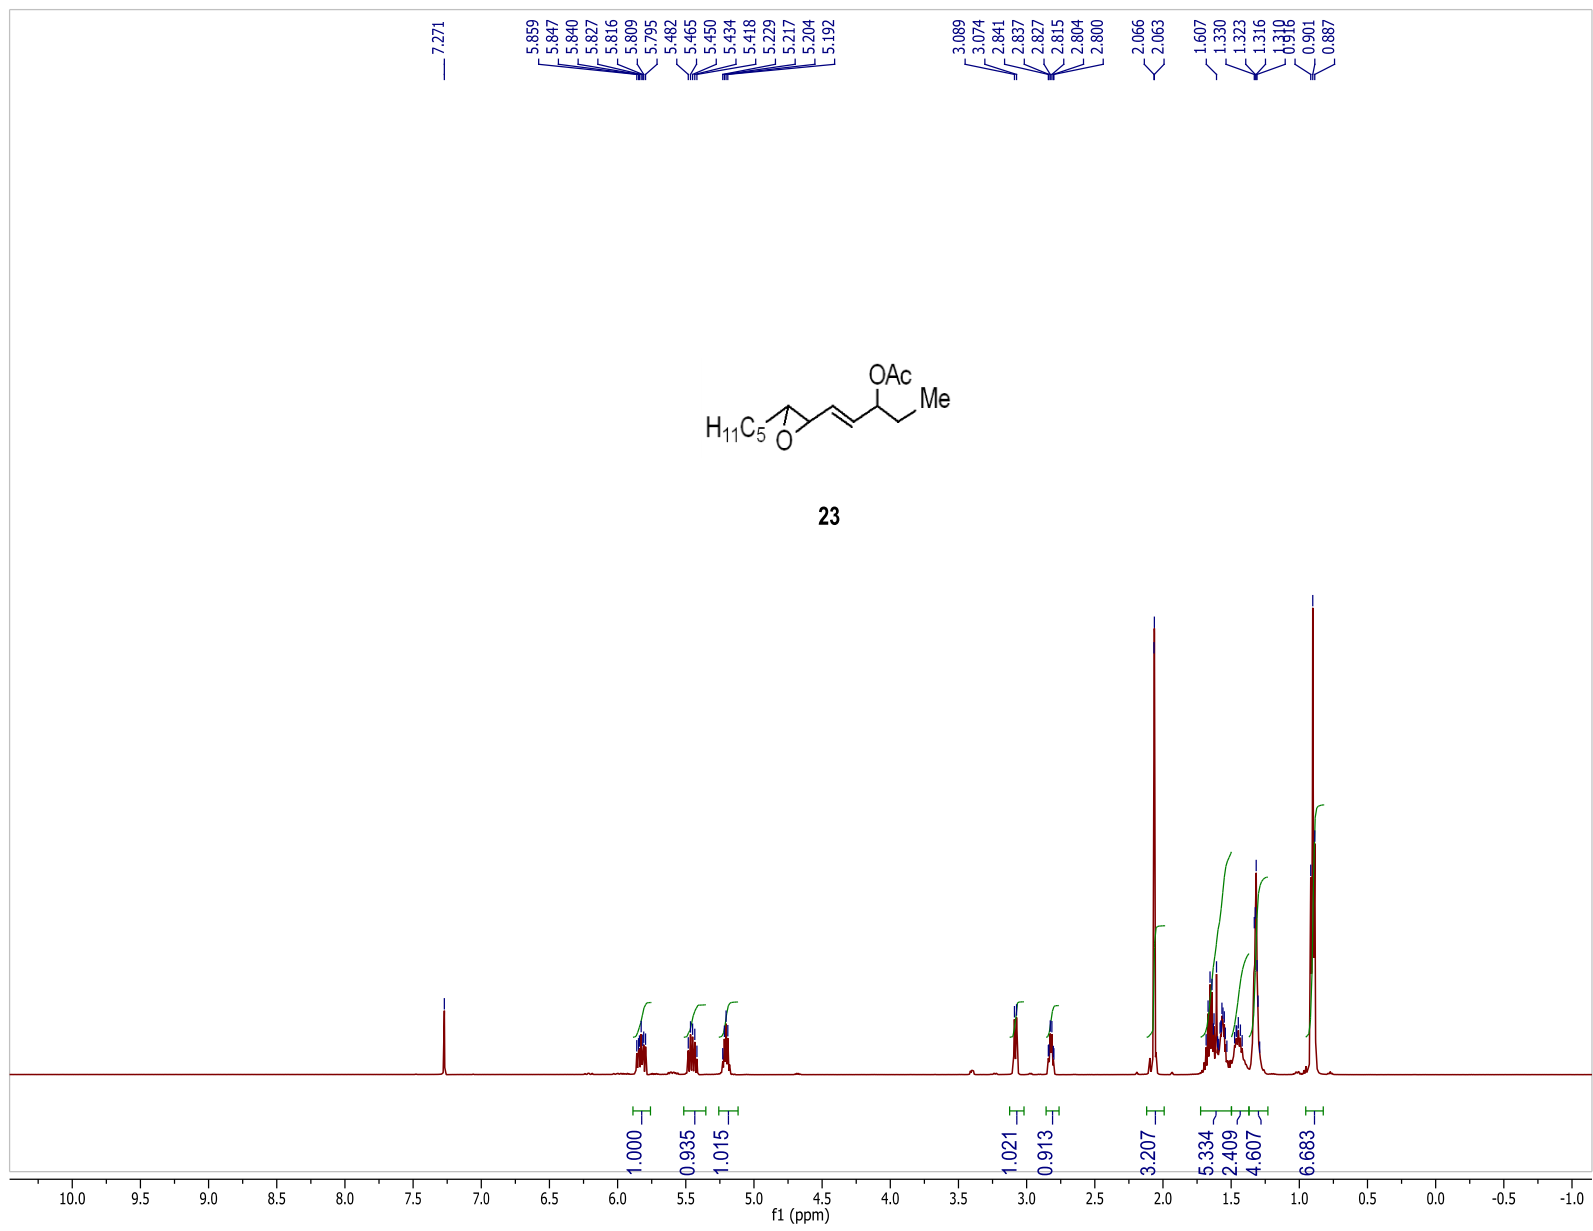

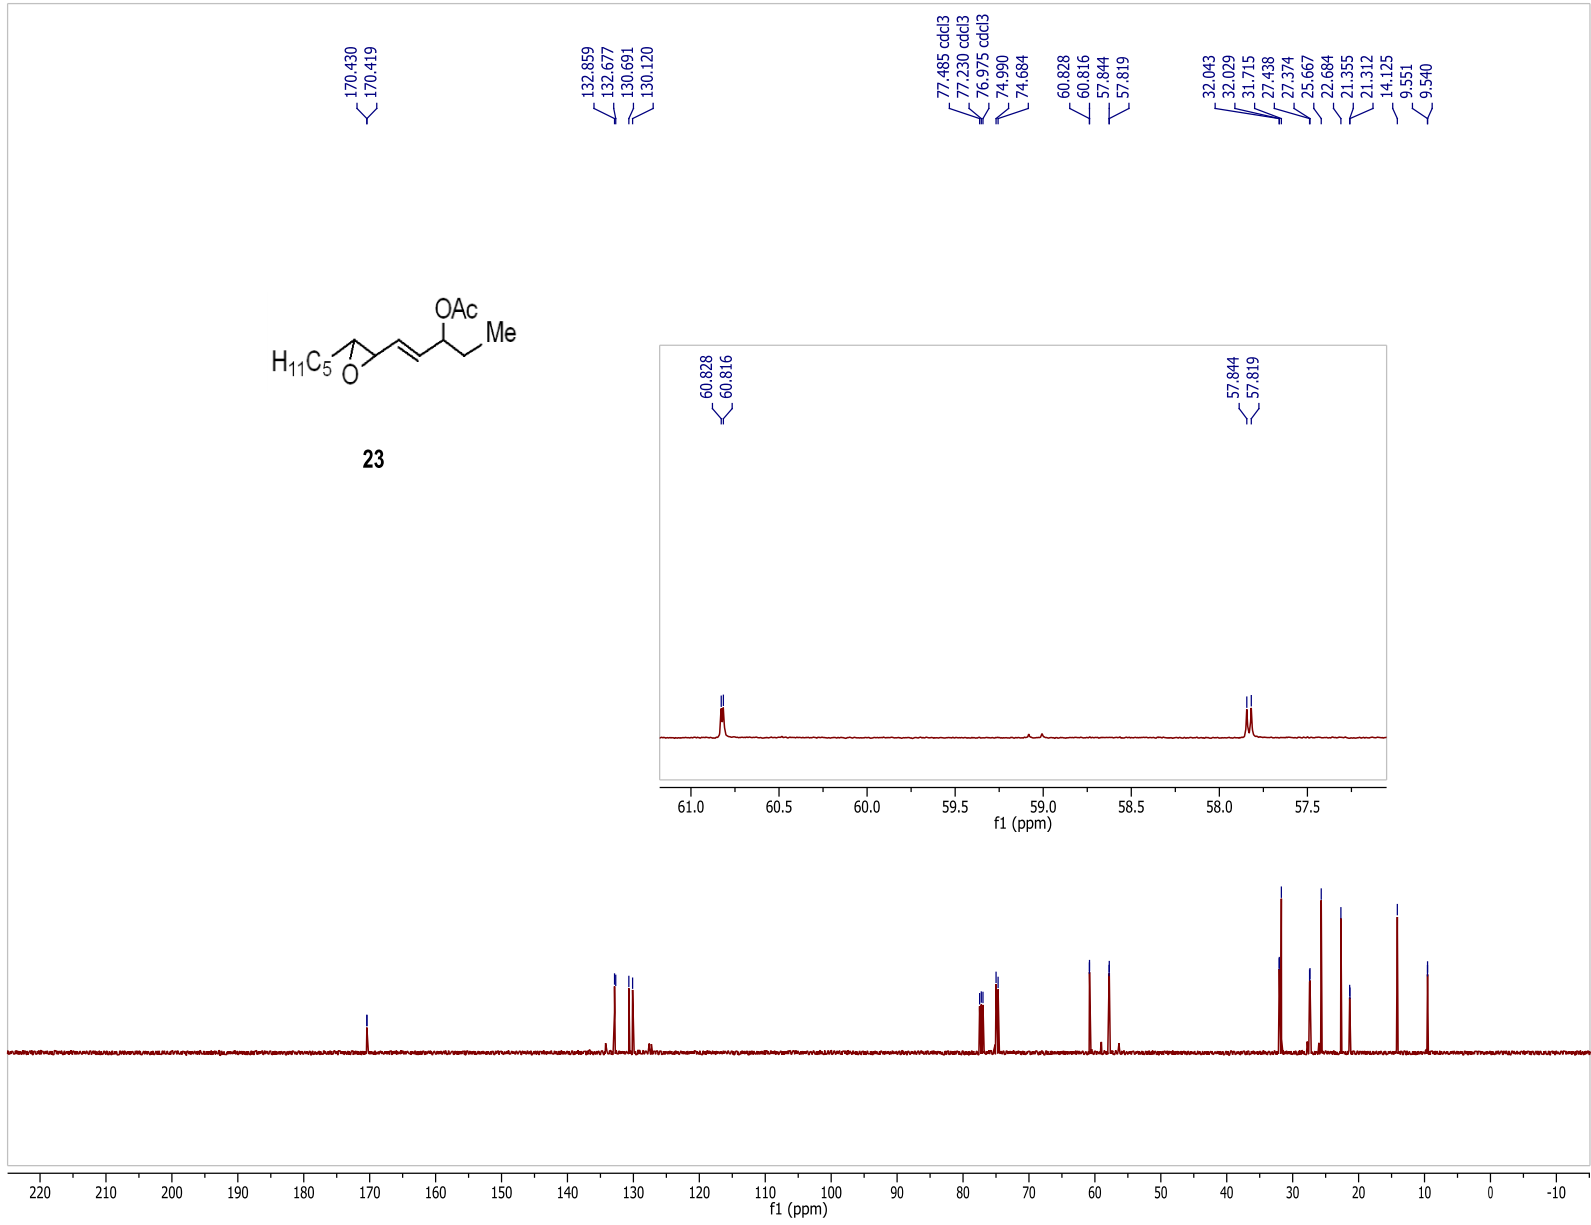

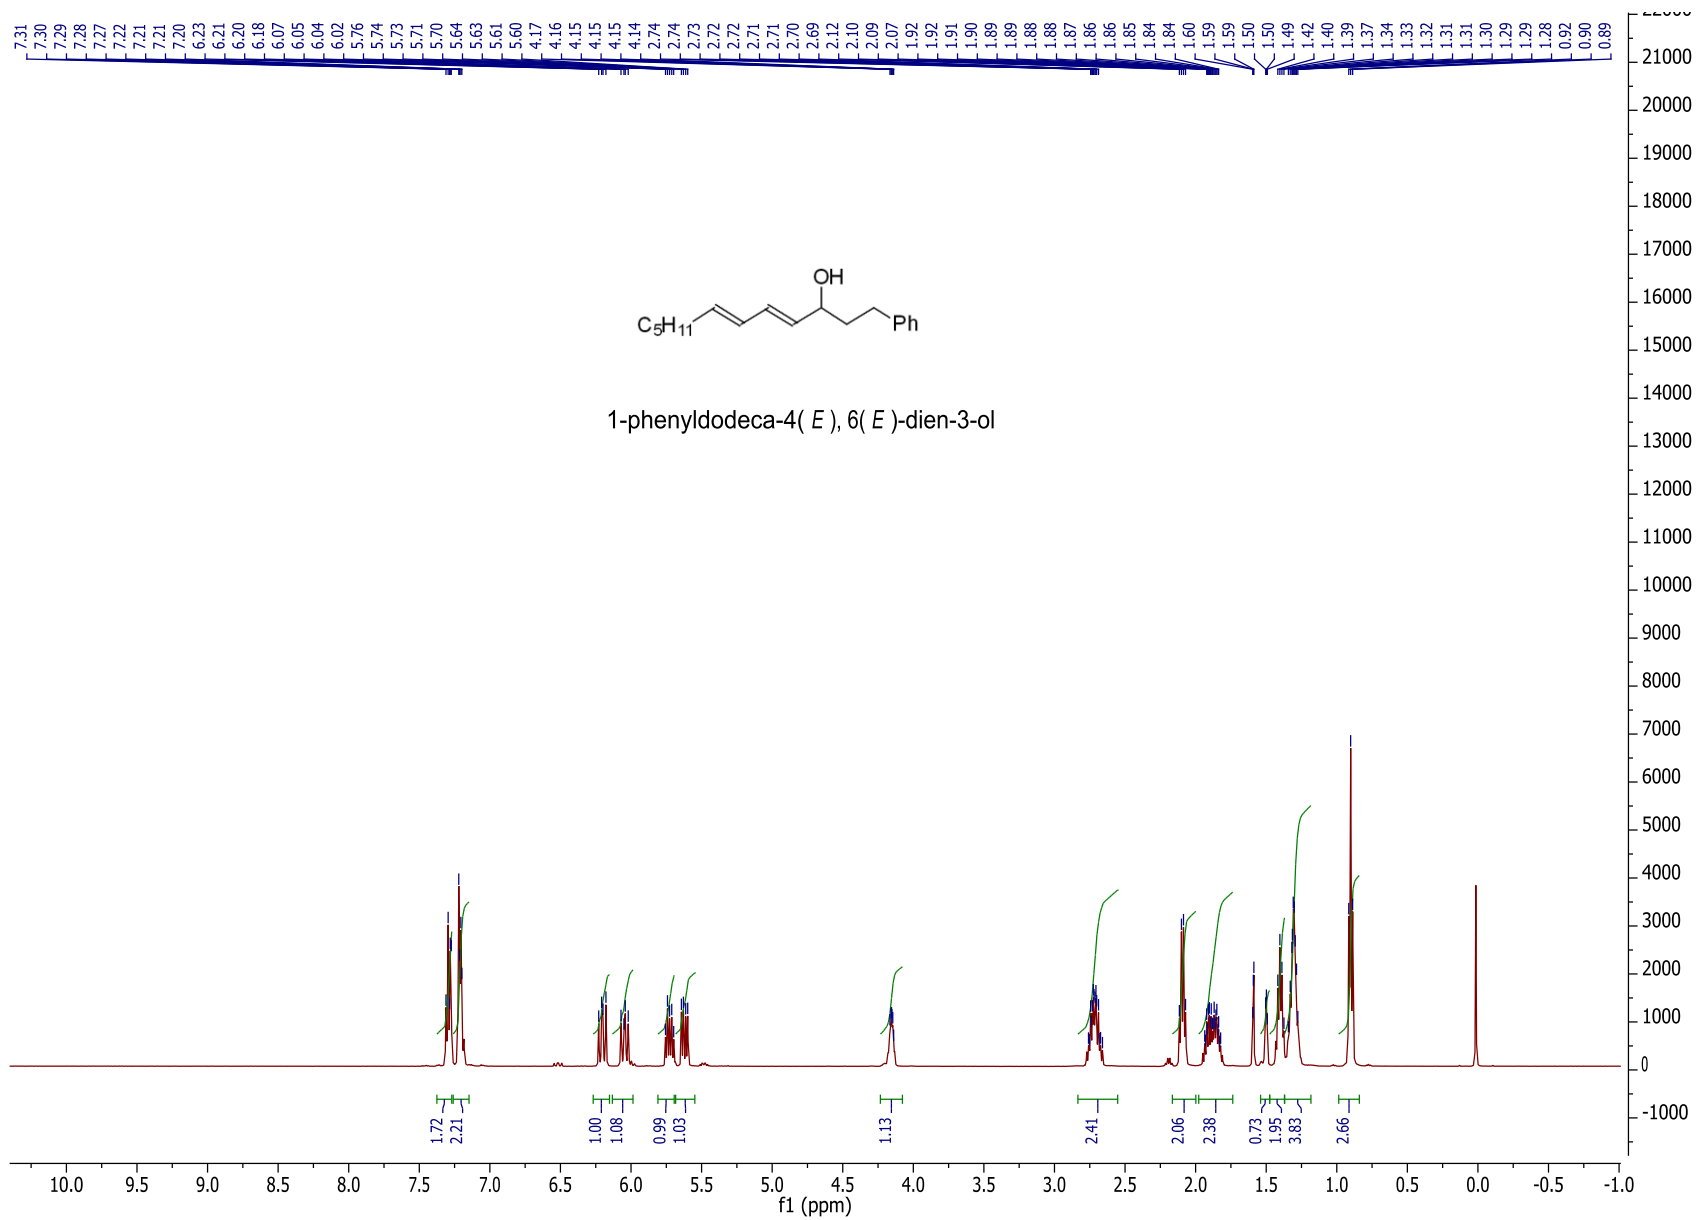

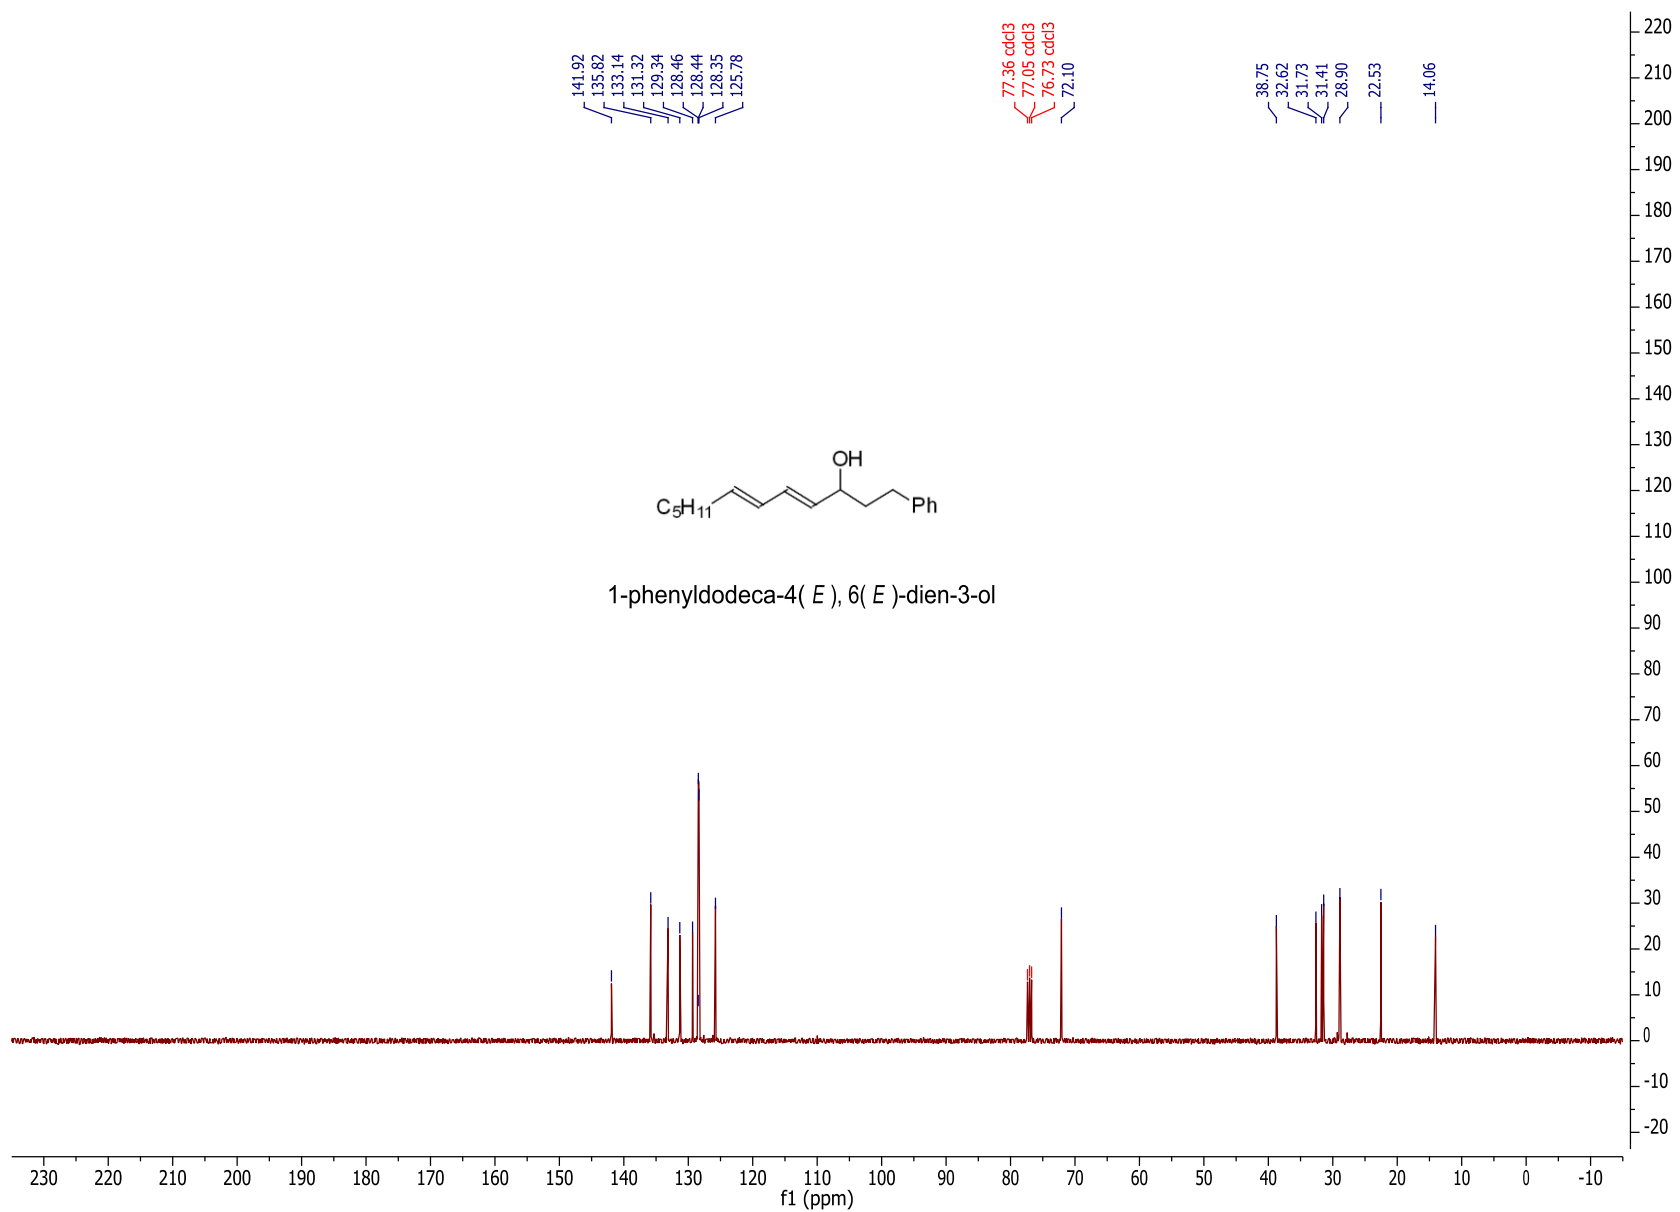

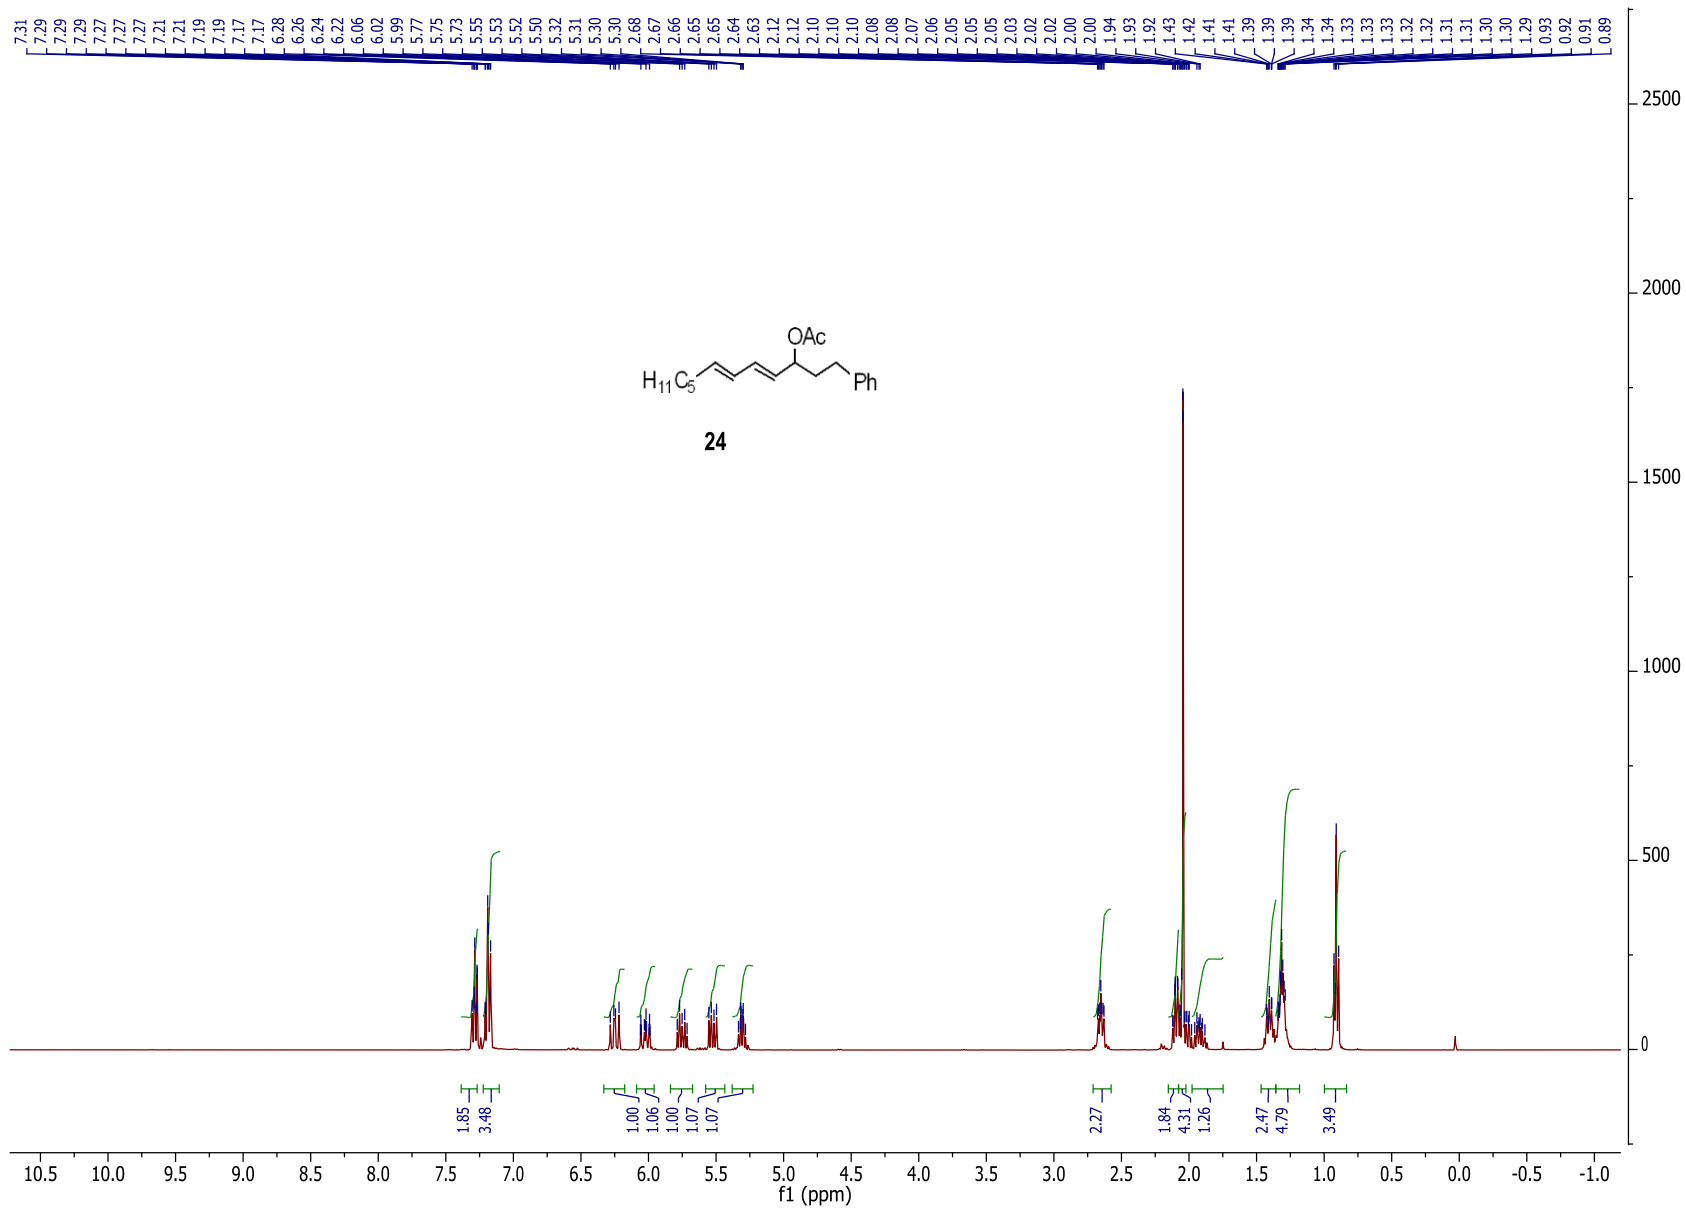

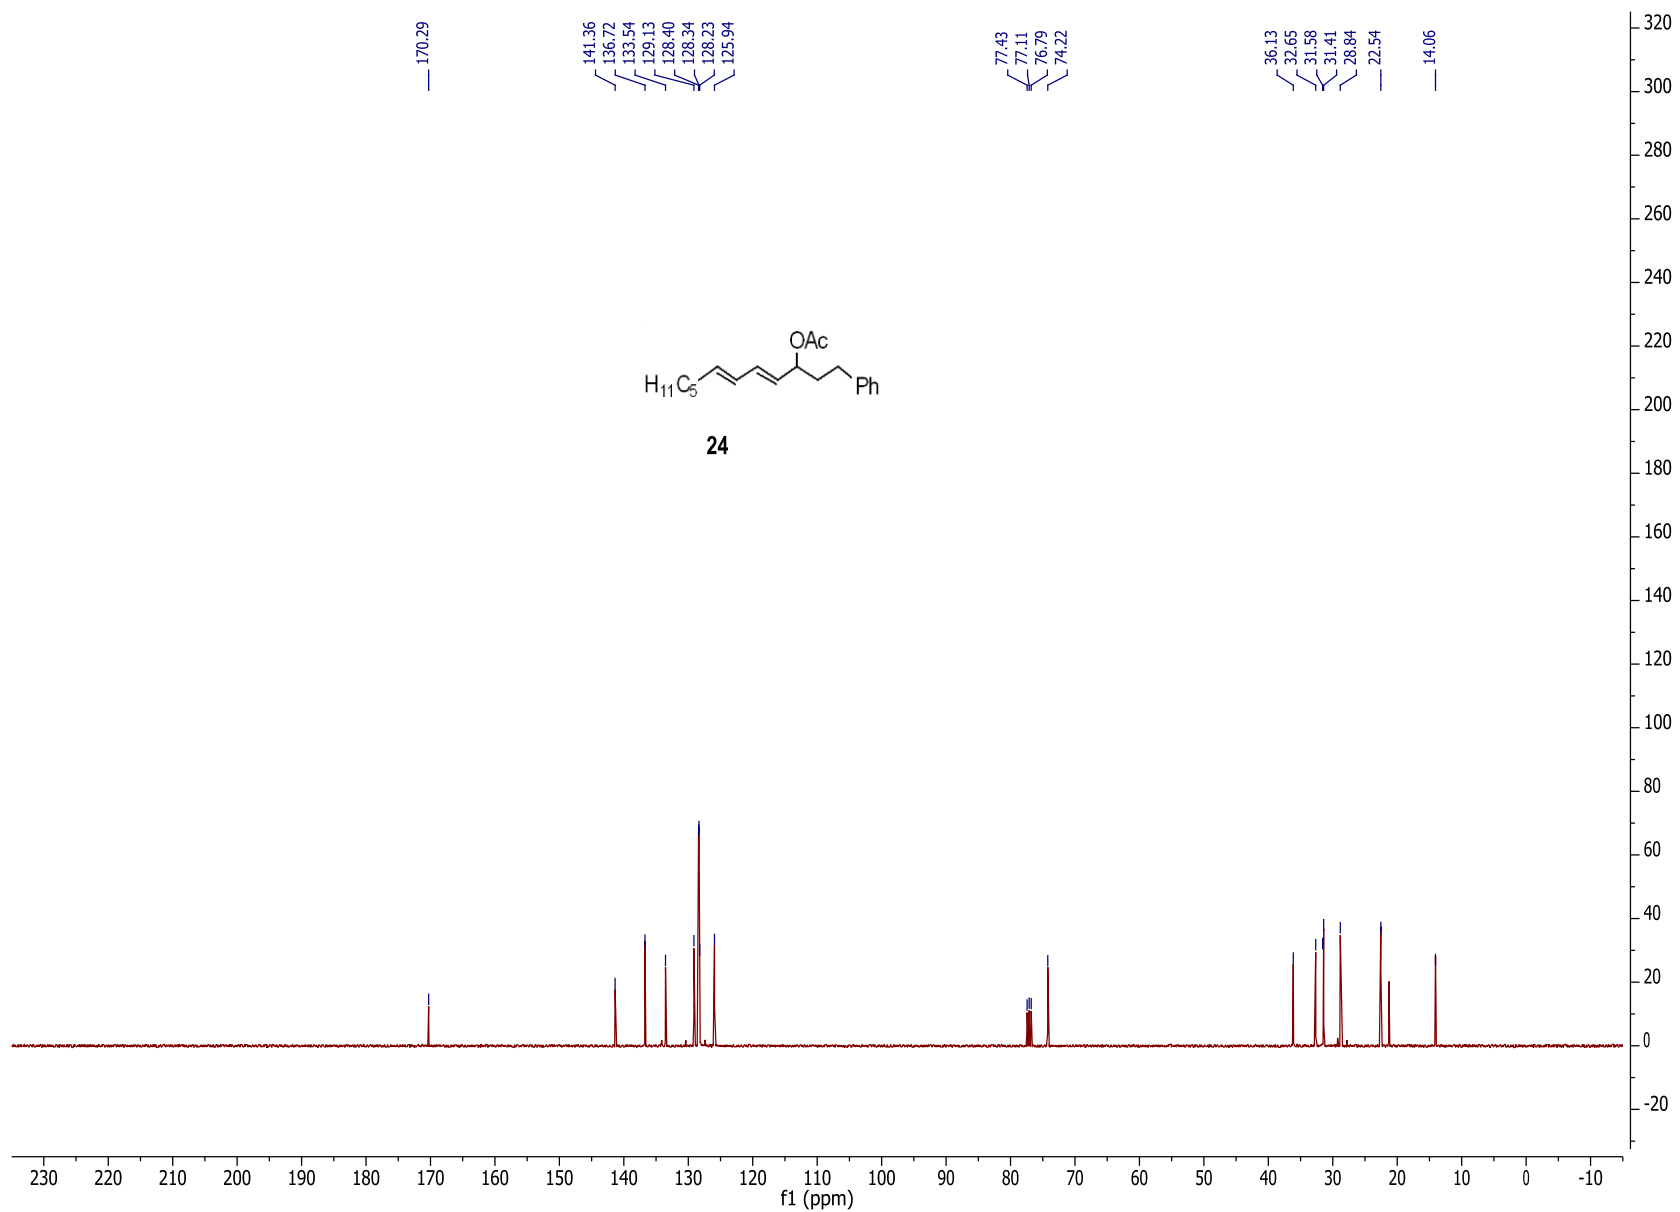



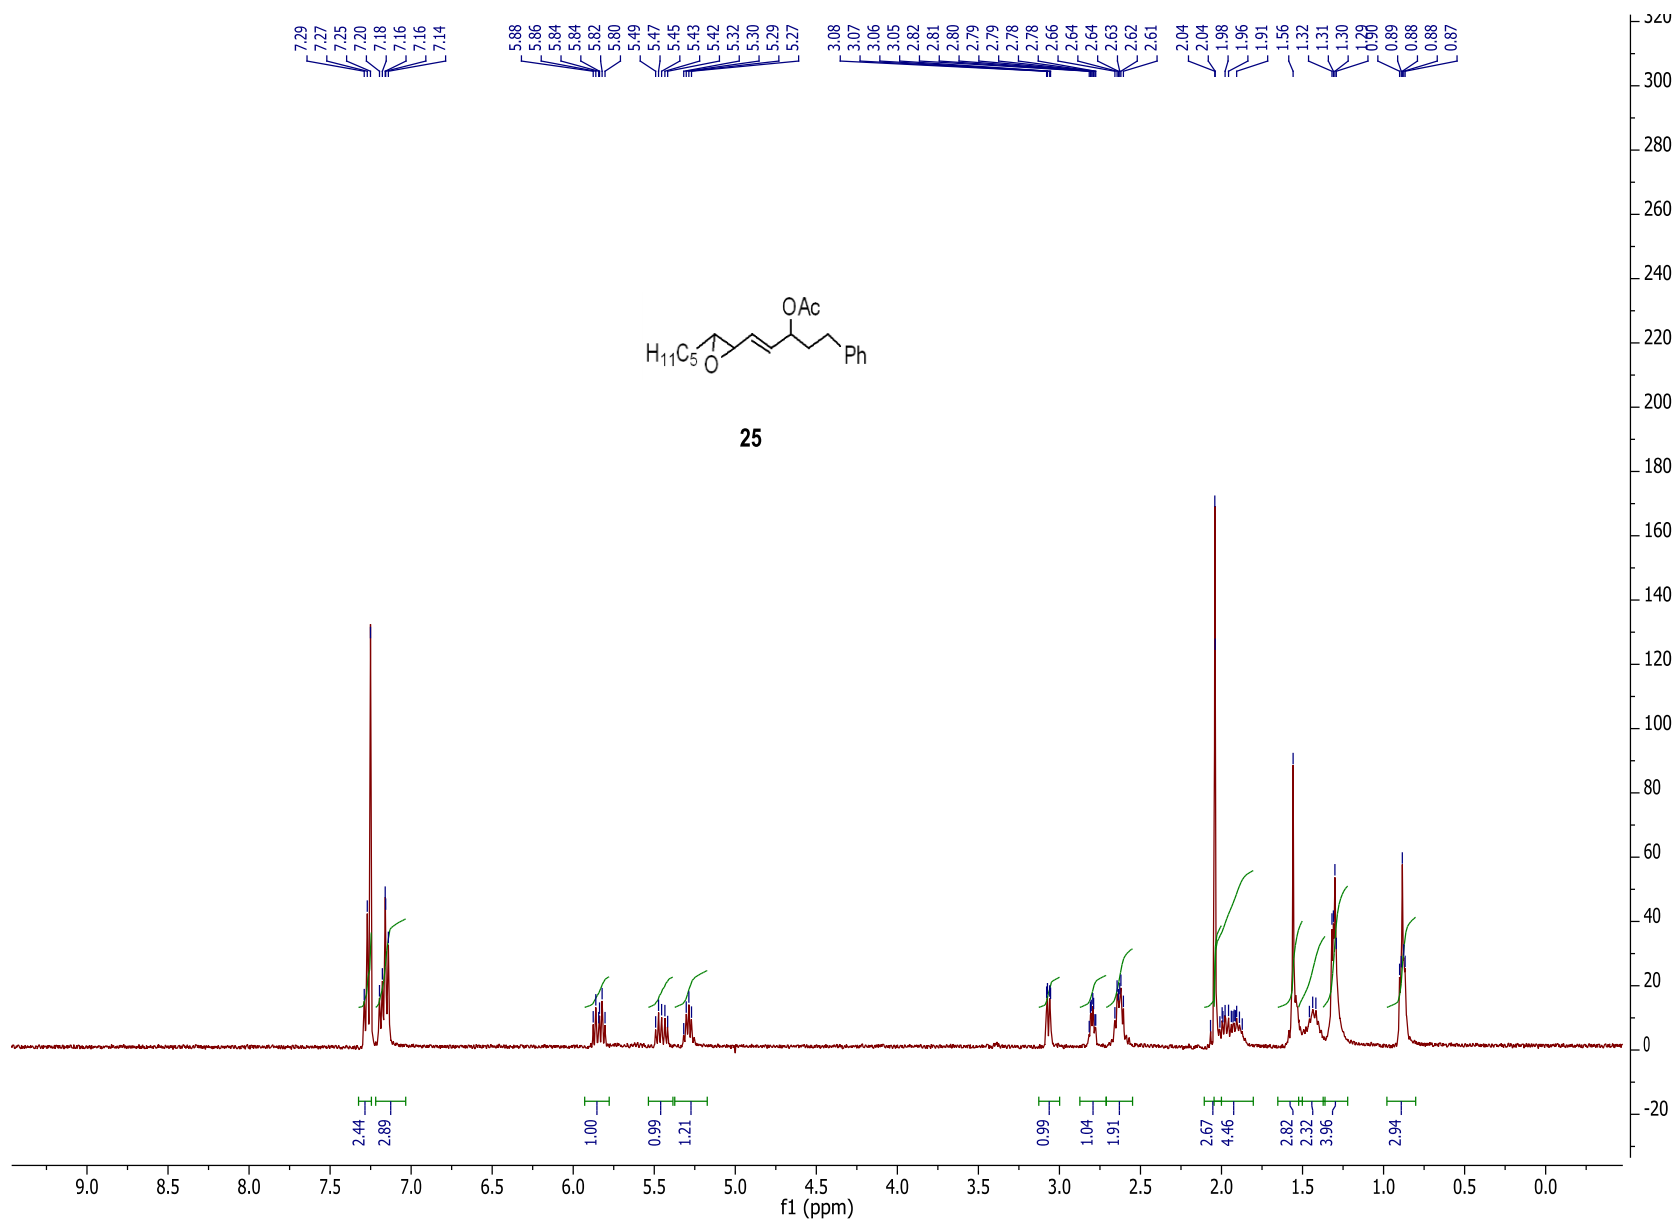

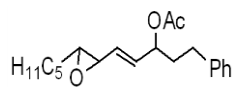

25

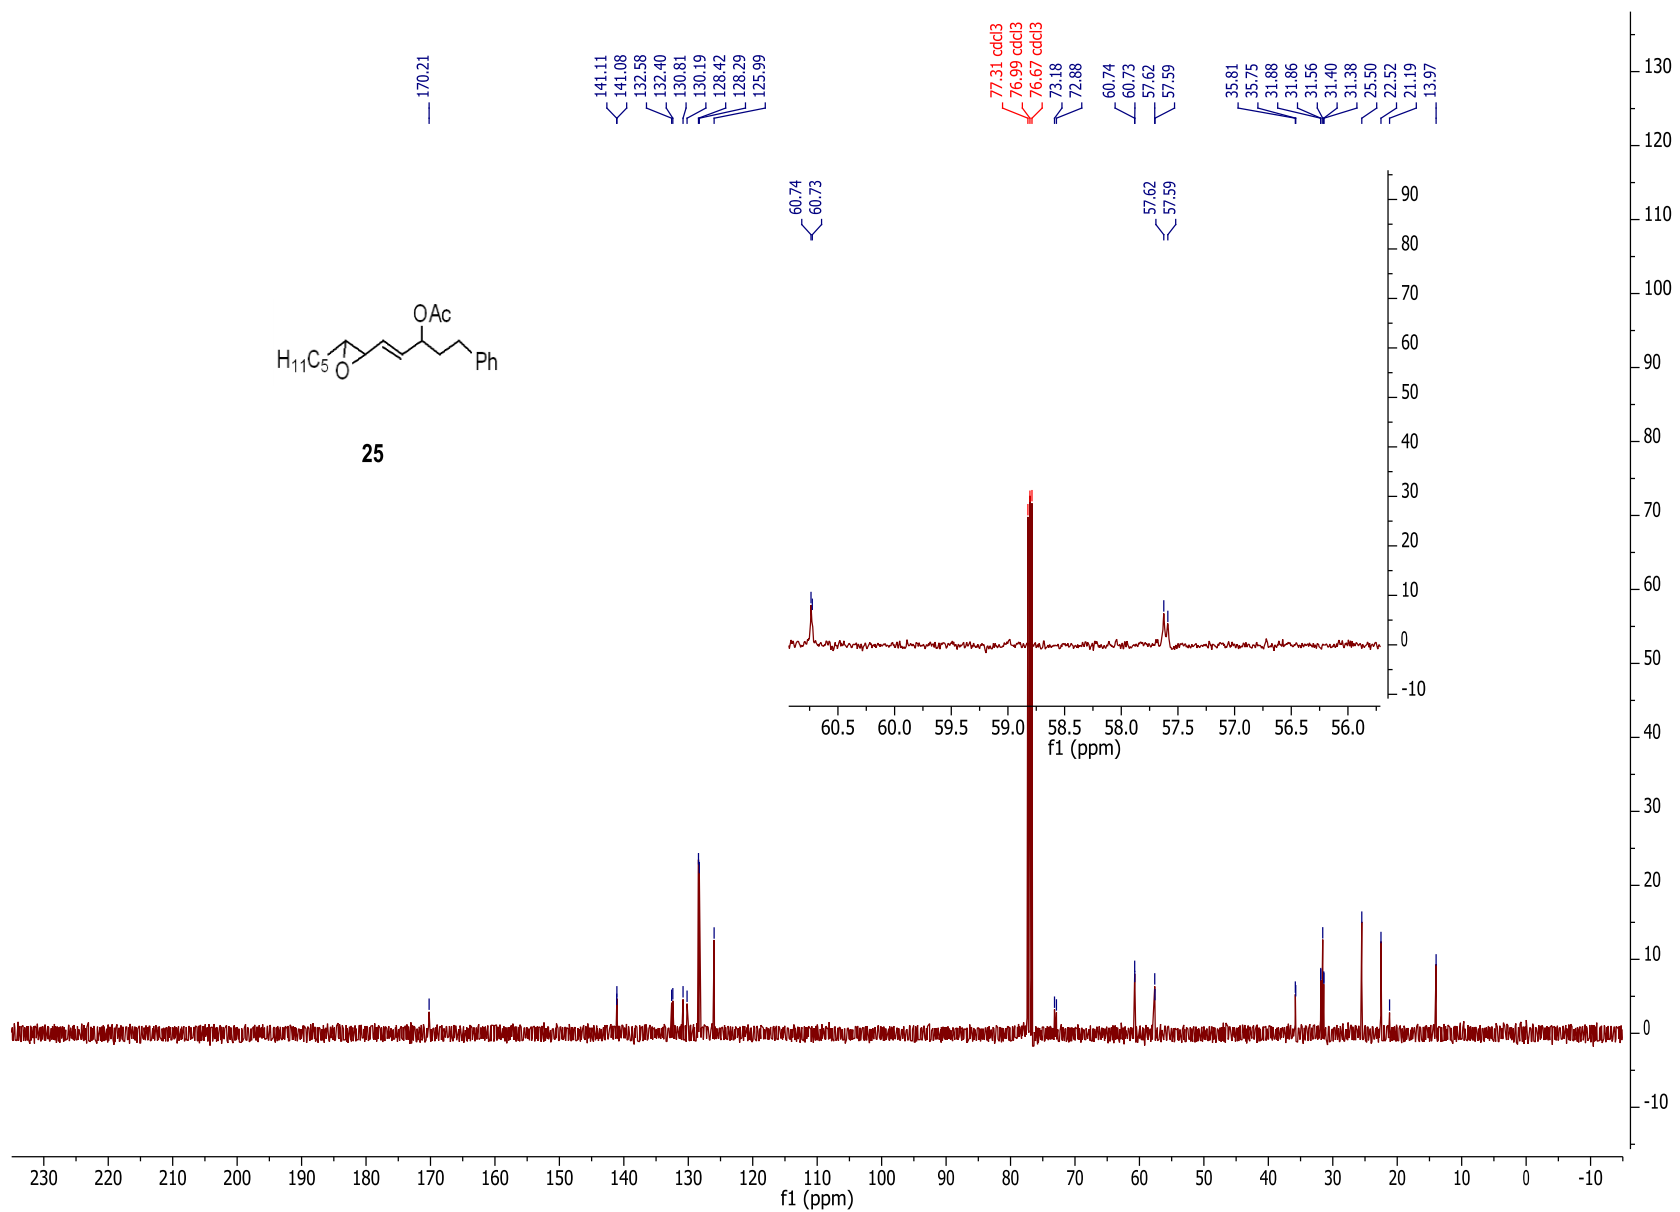



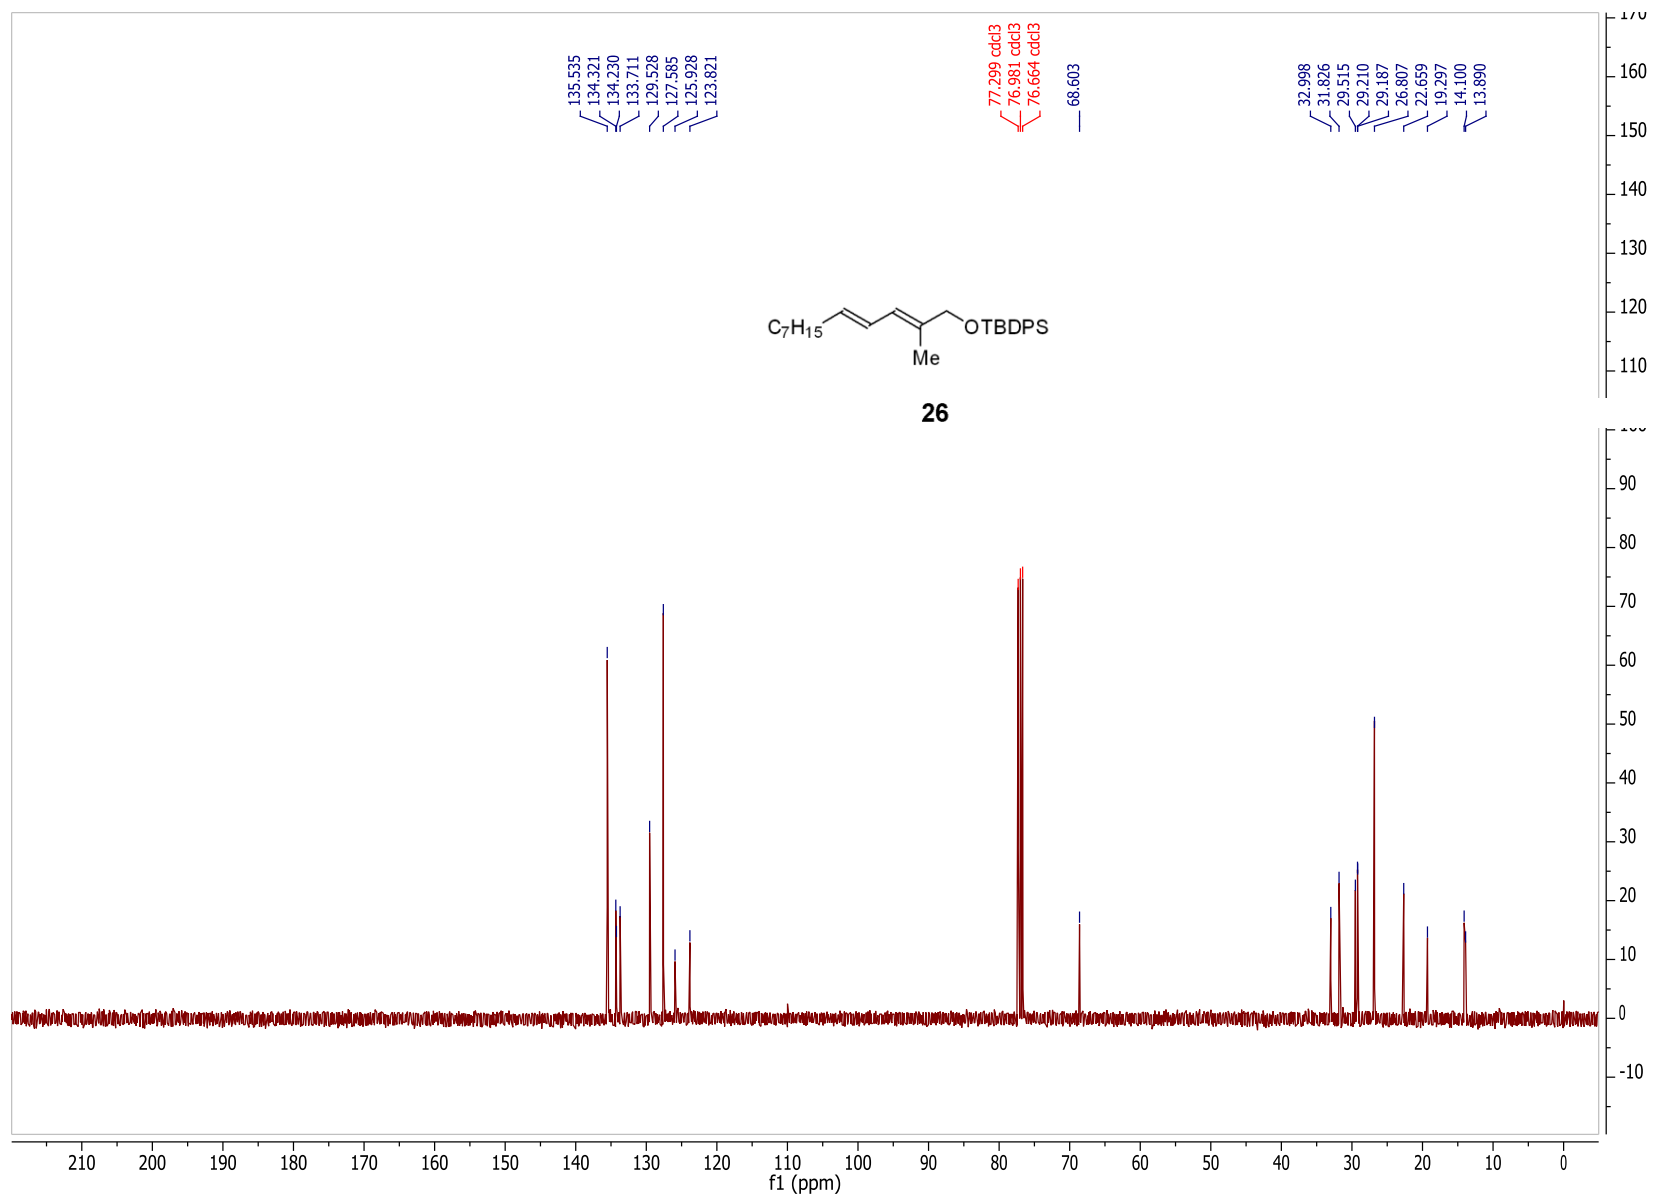





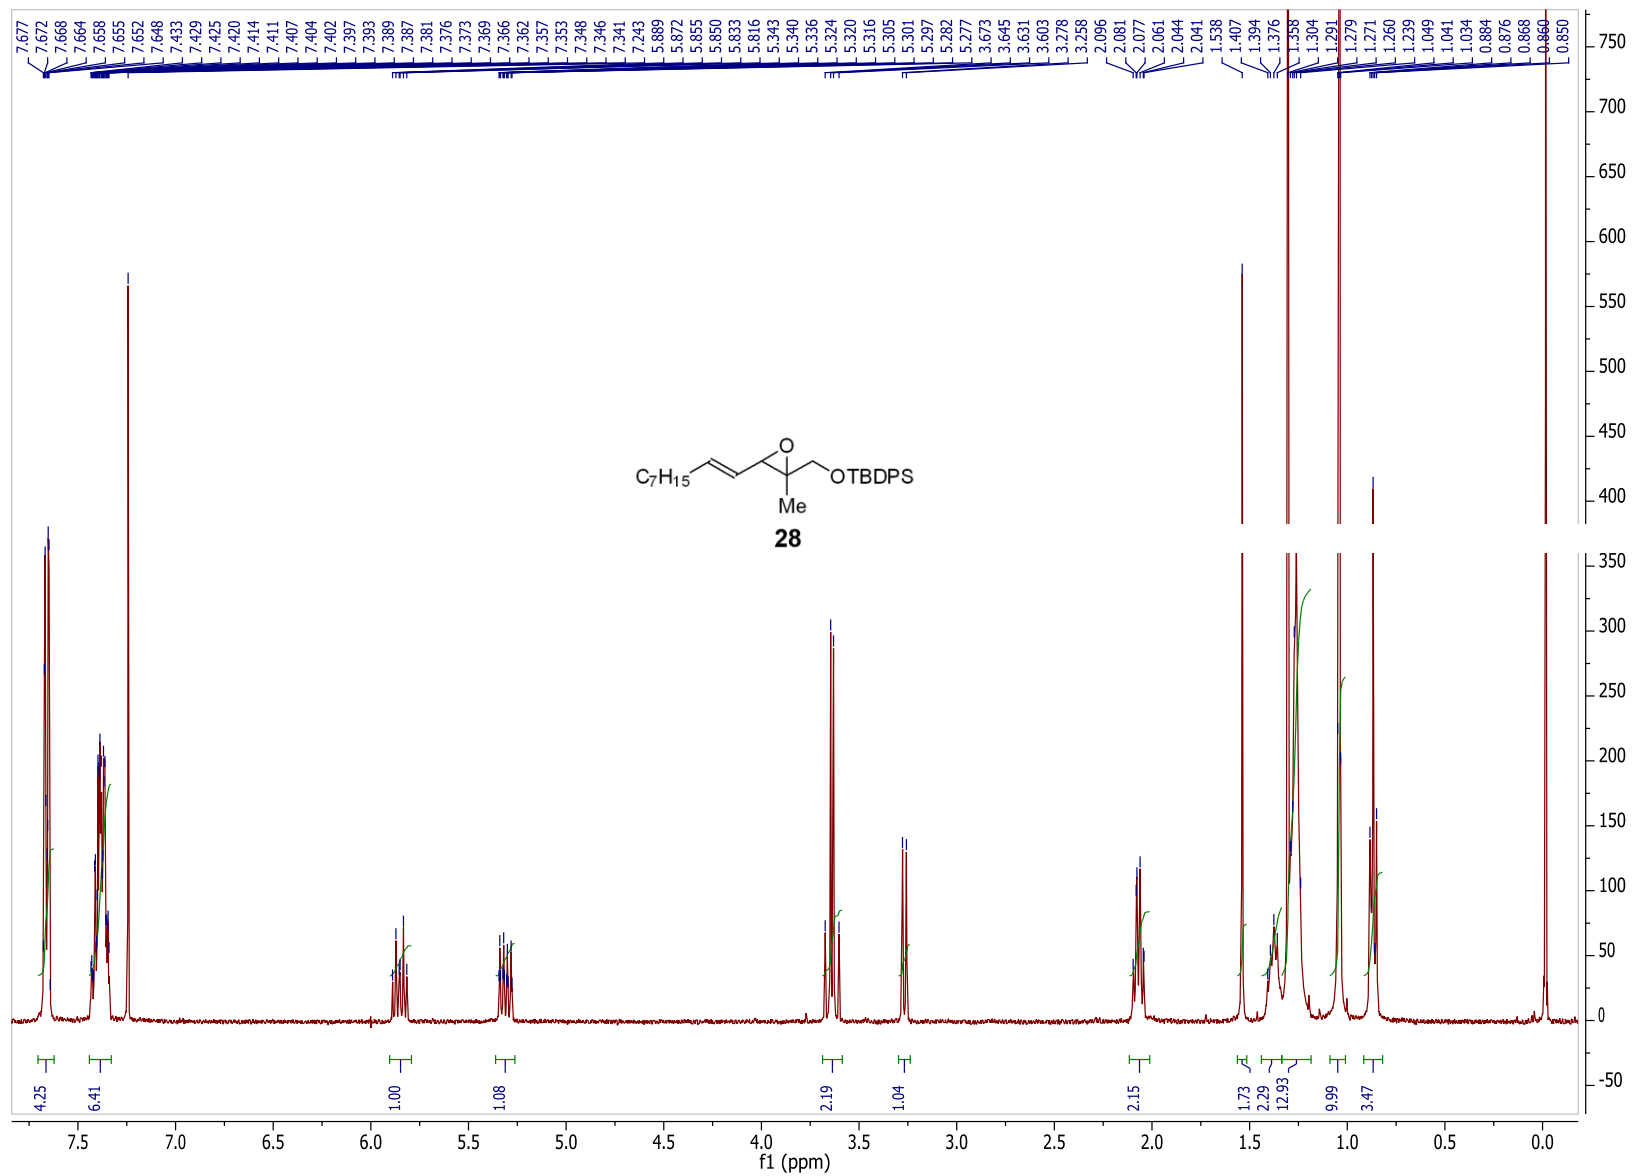

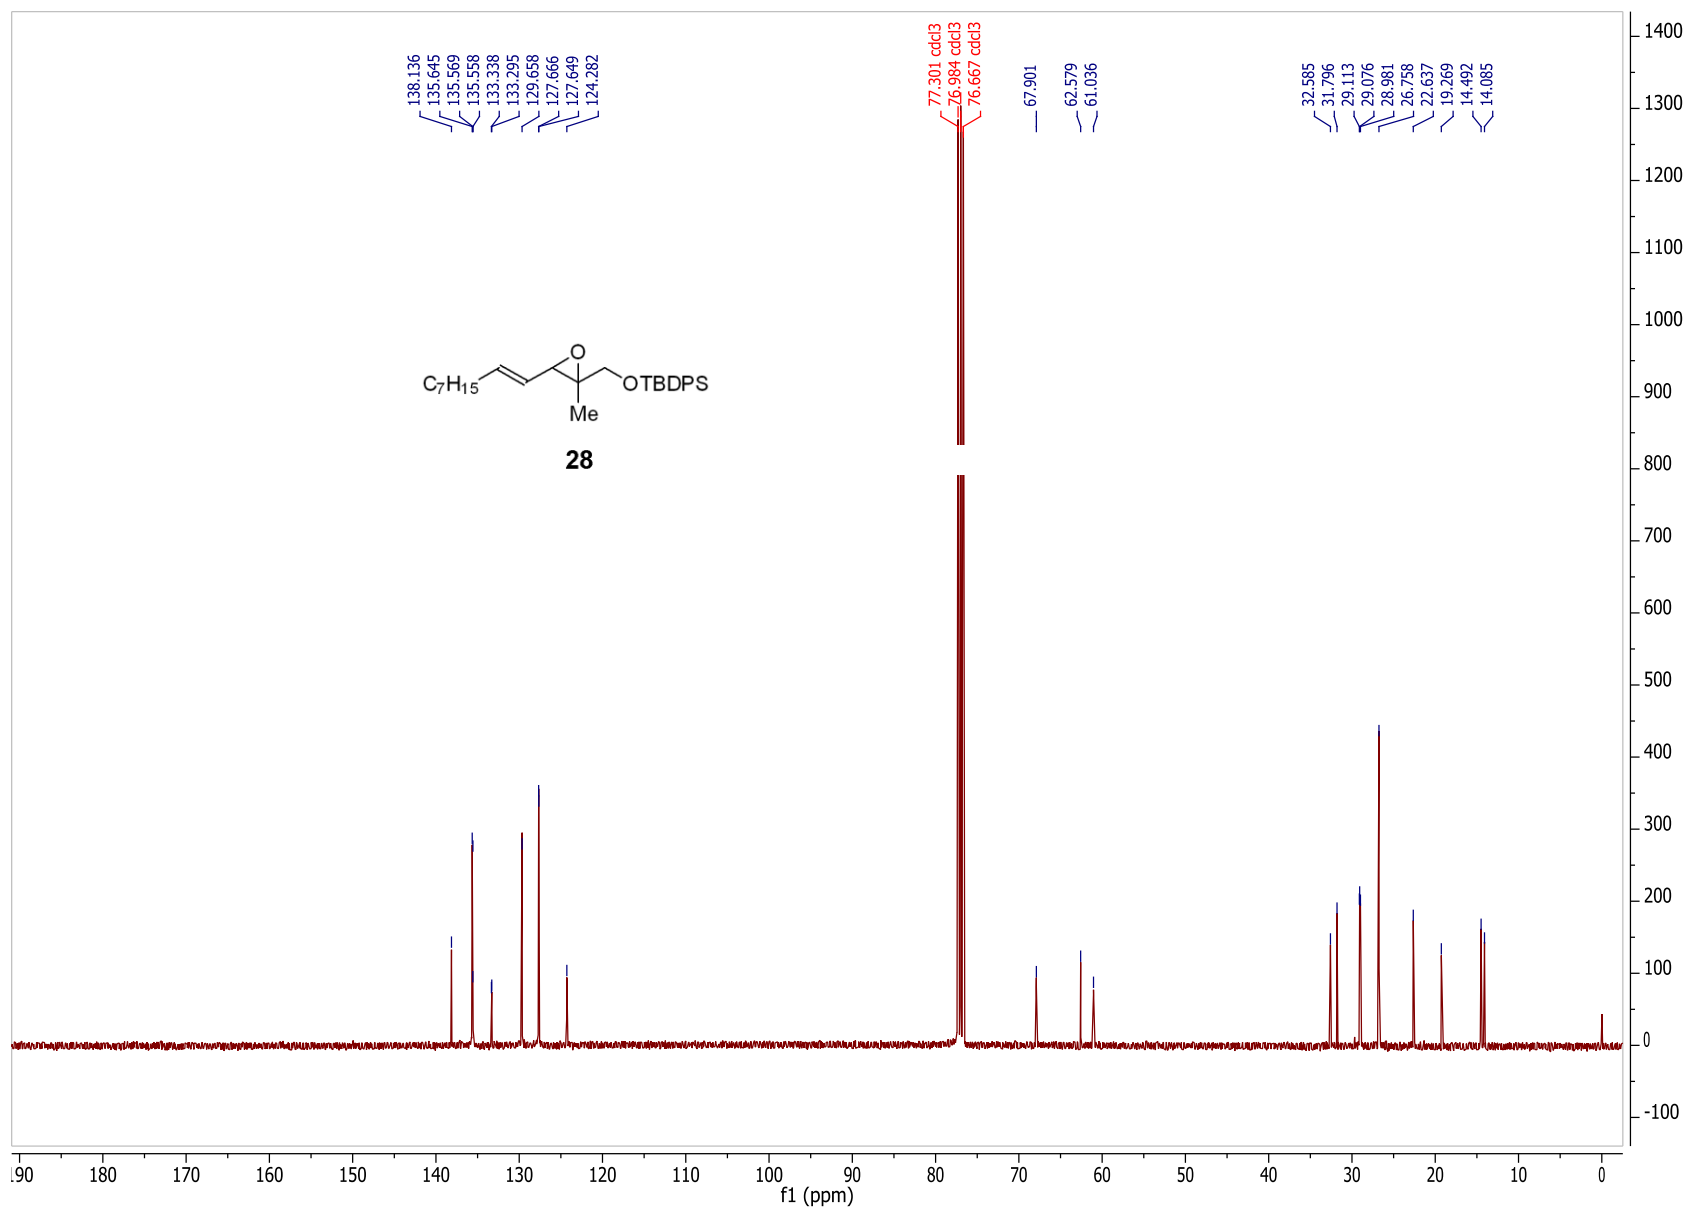



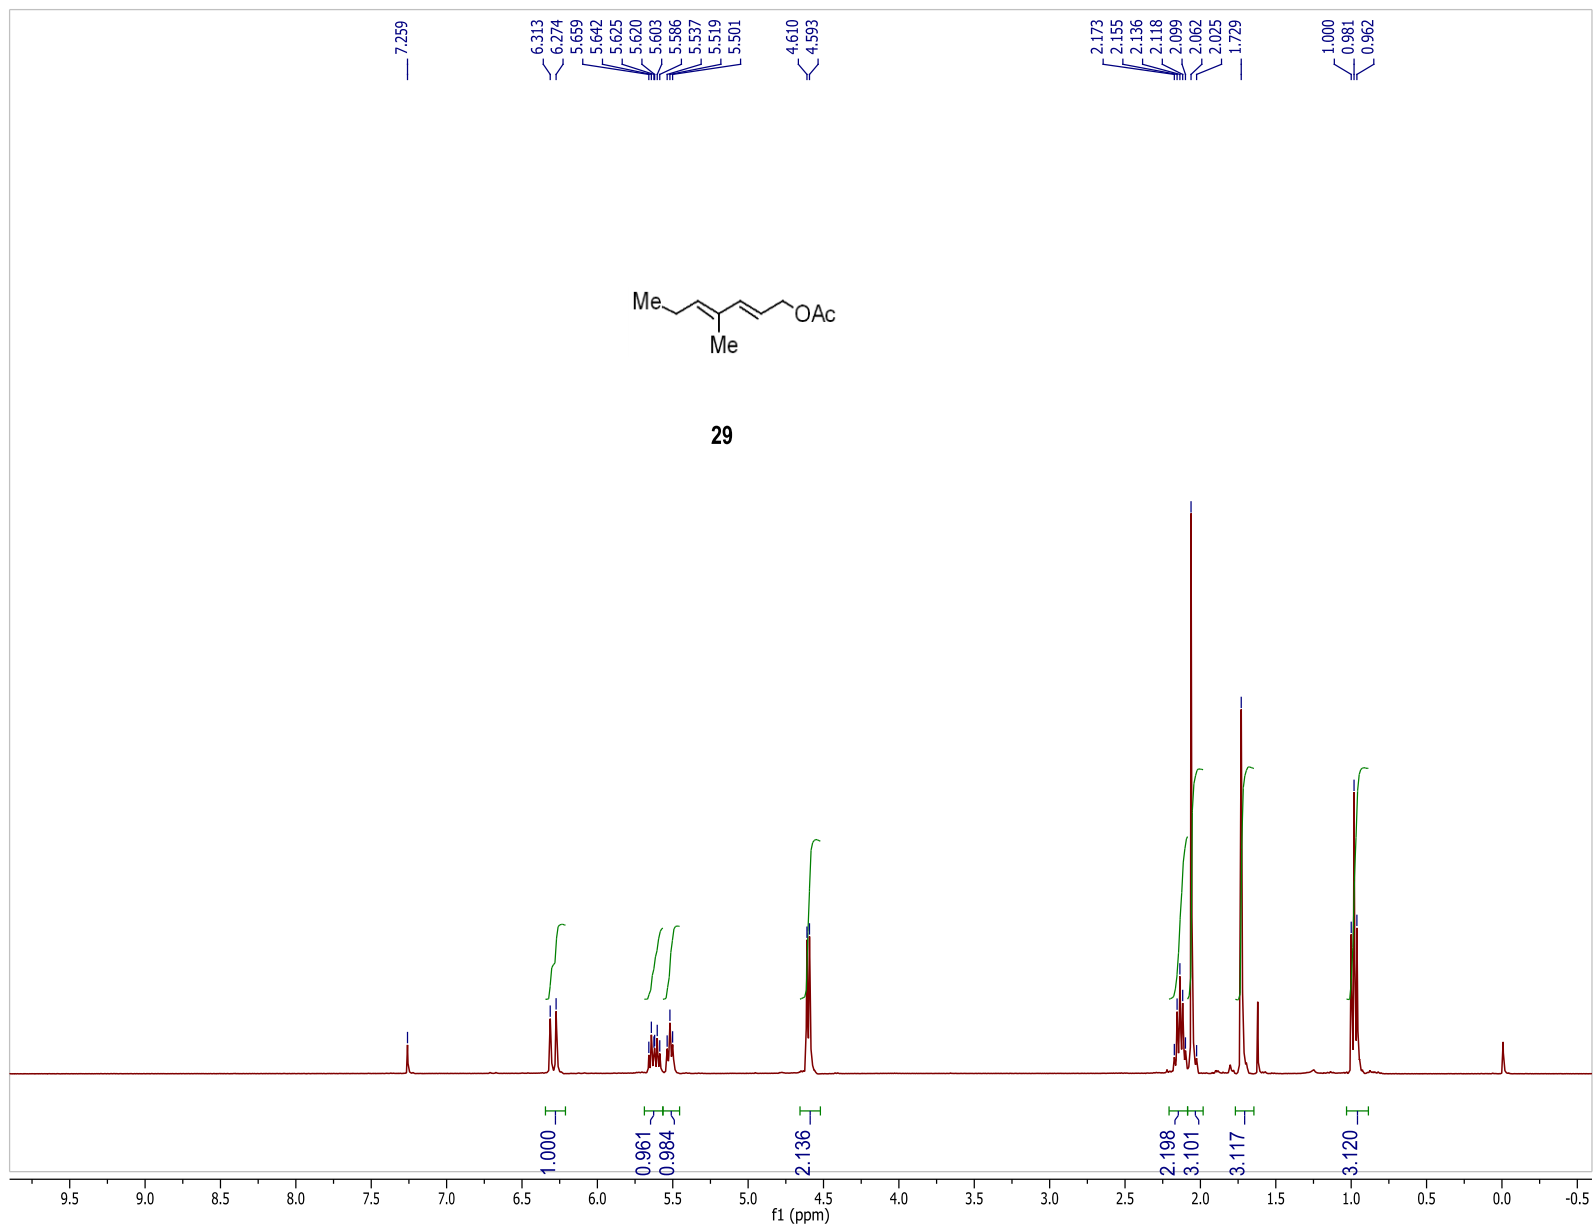

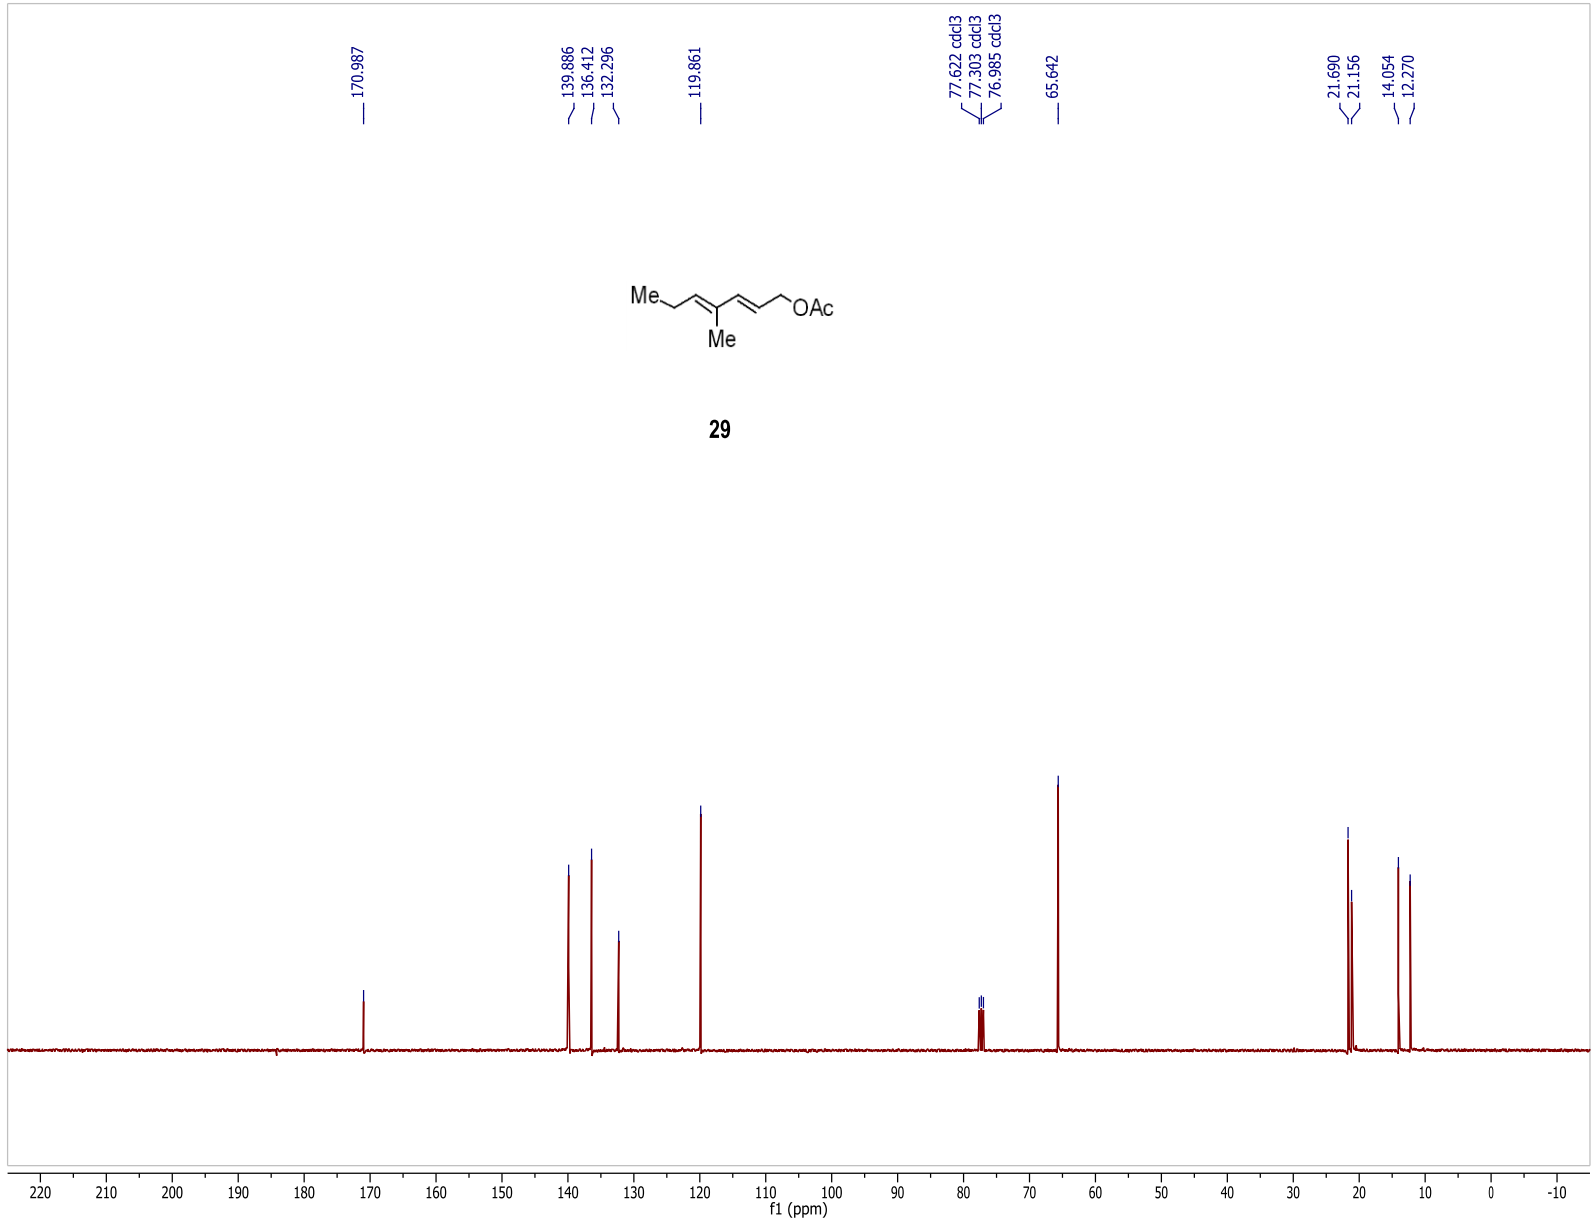

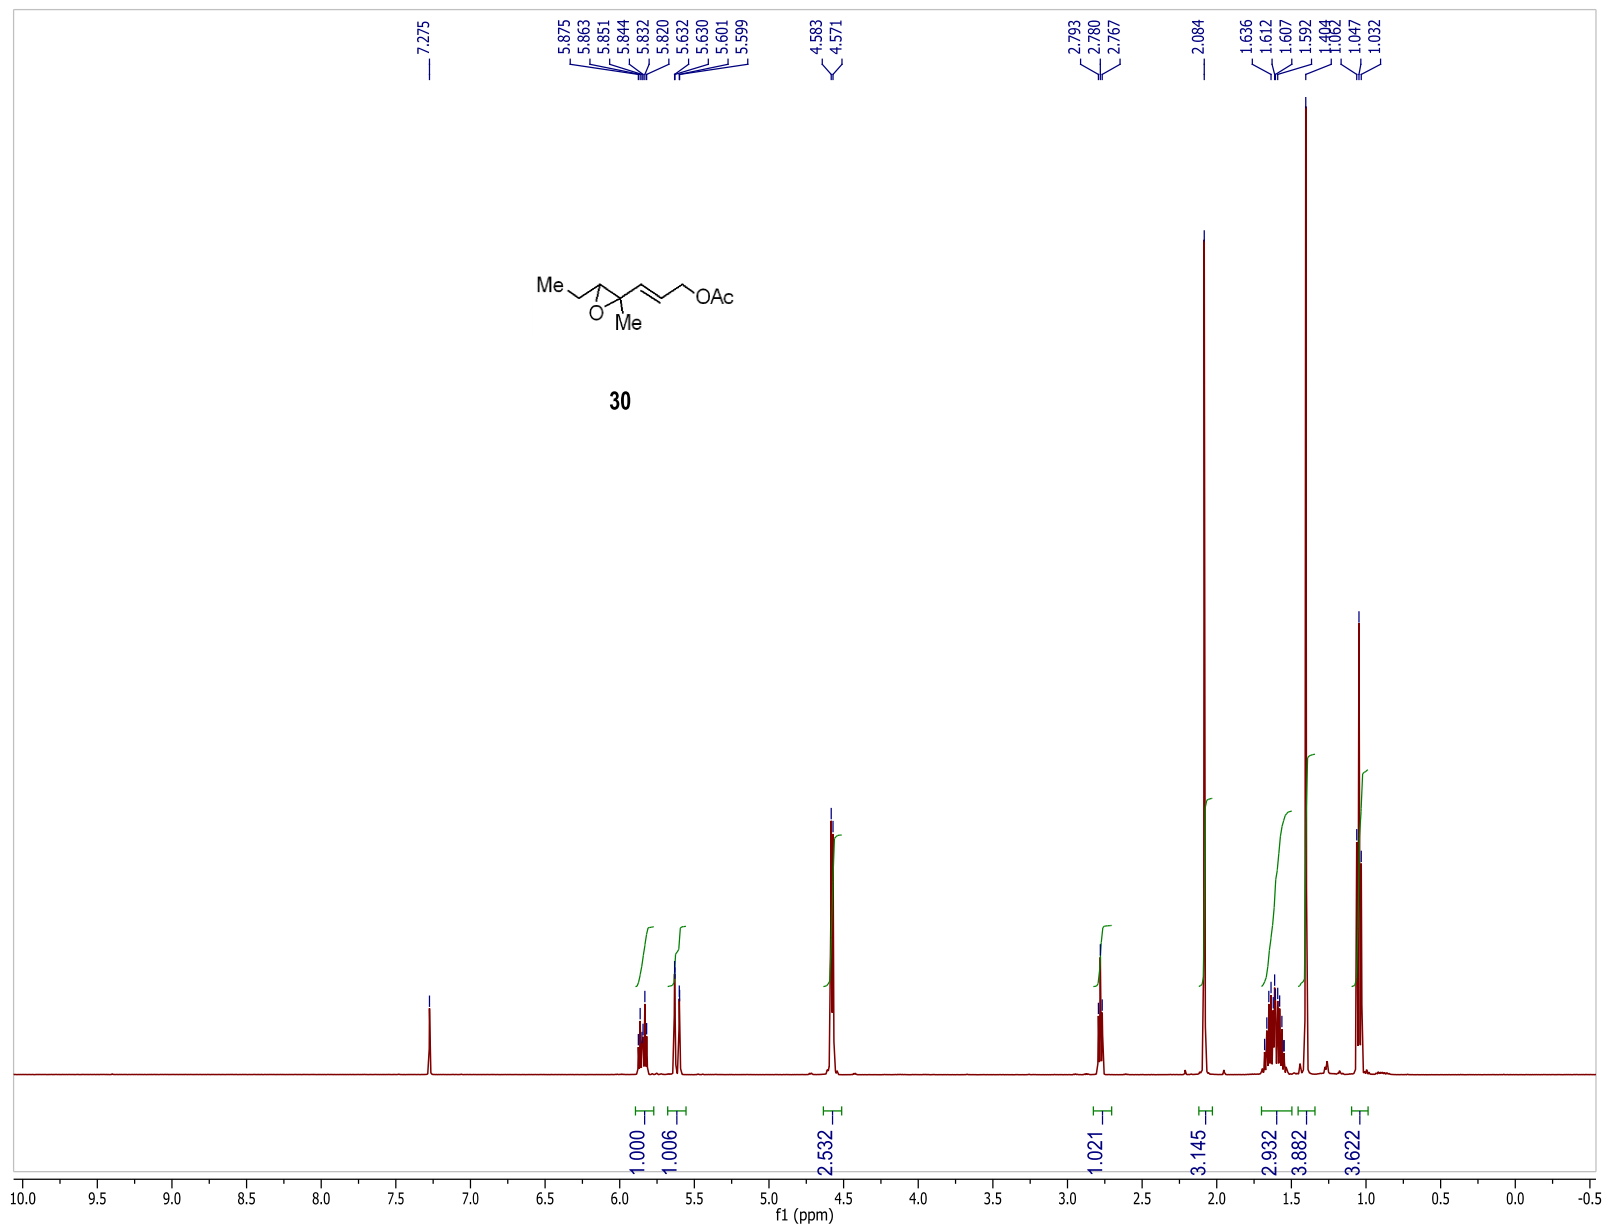

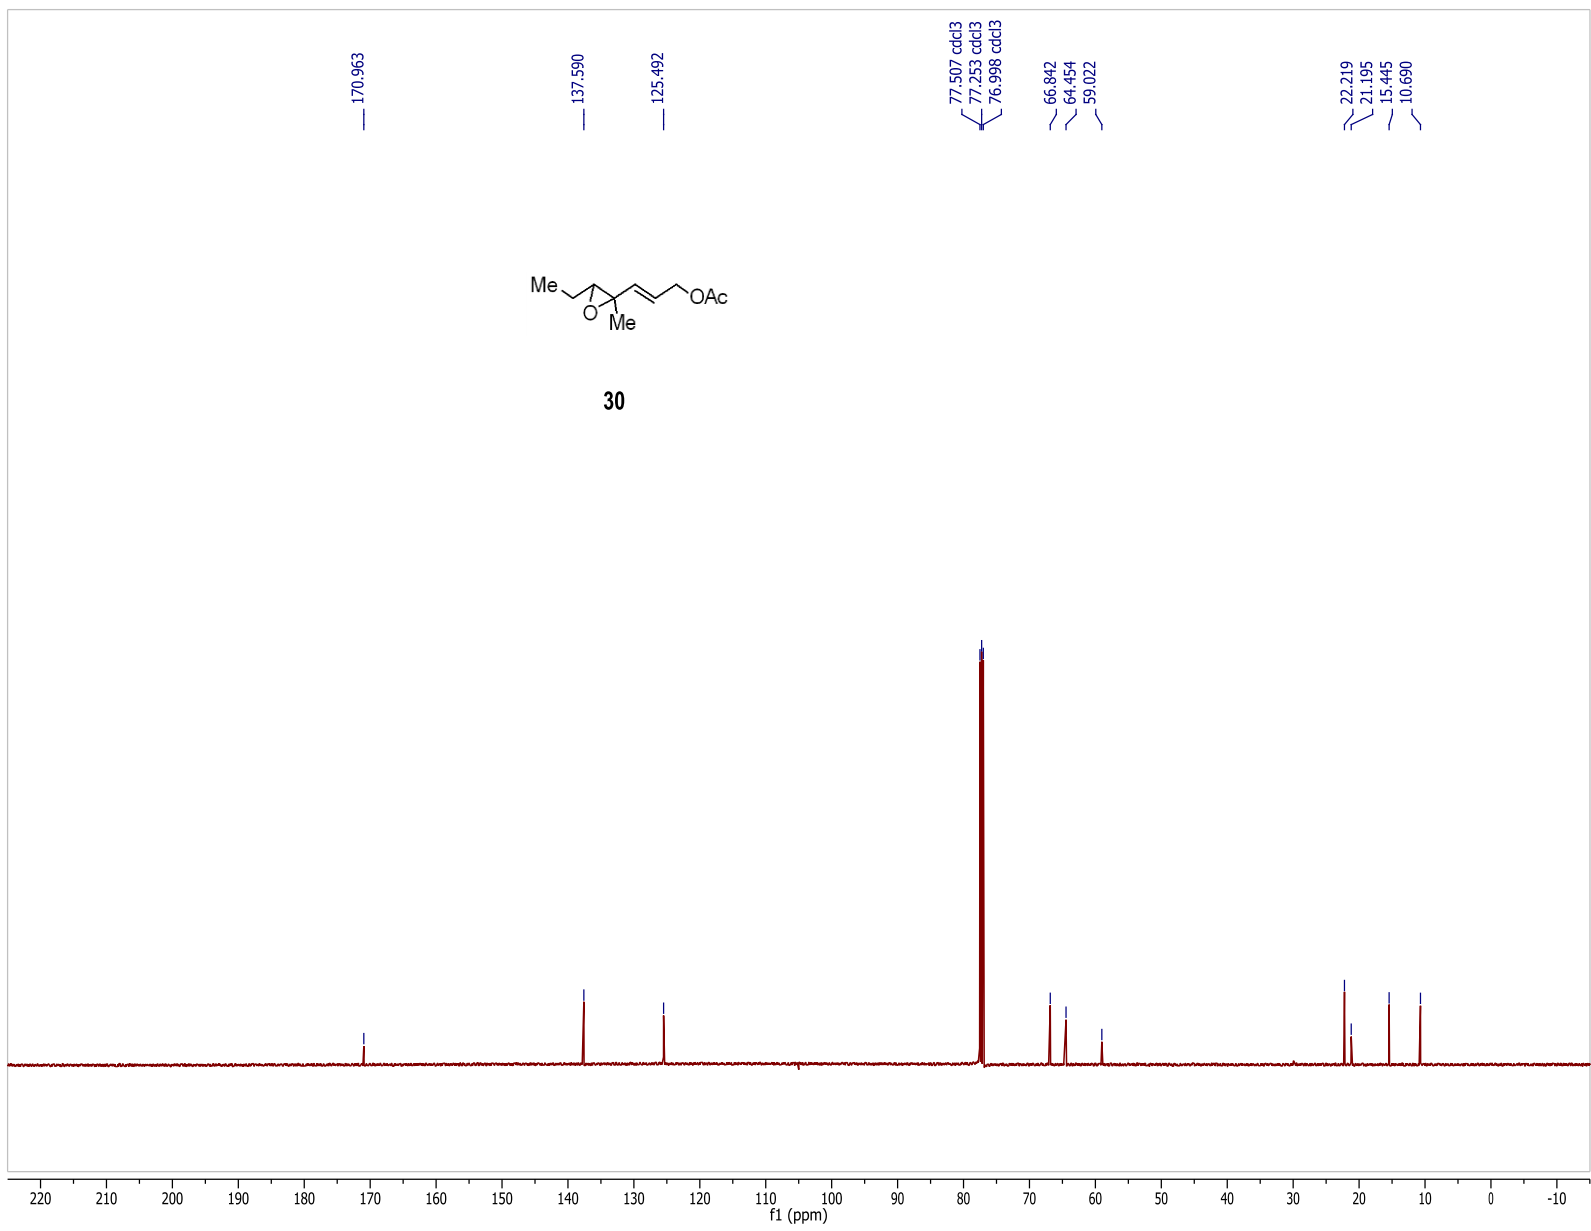

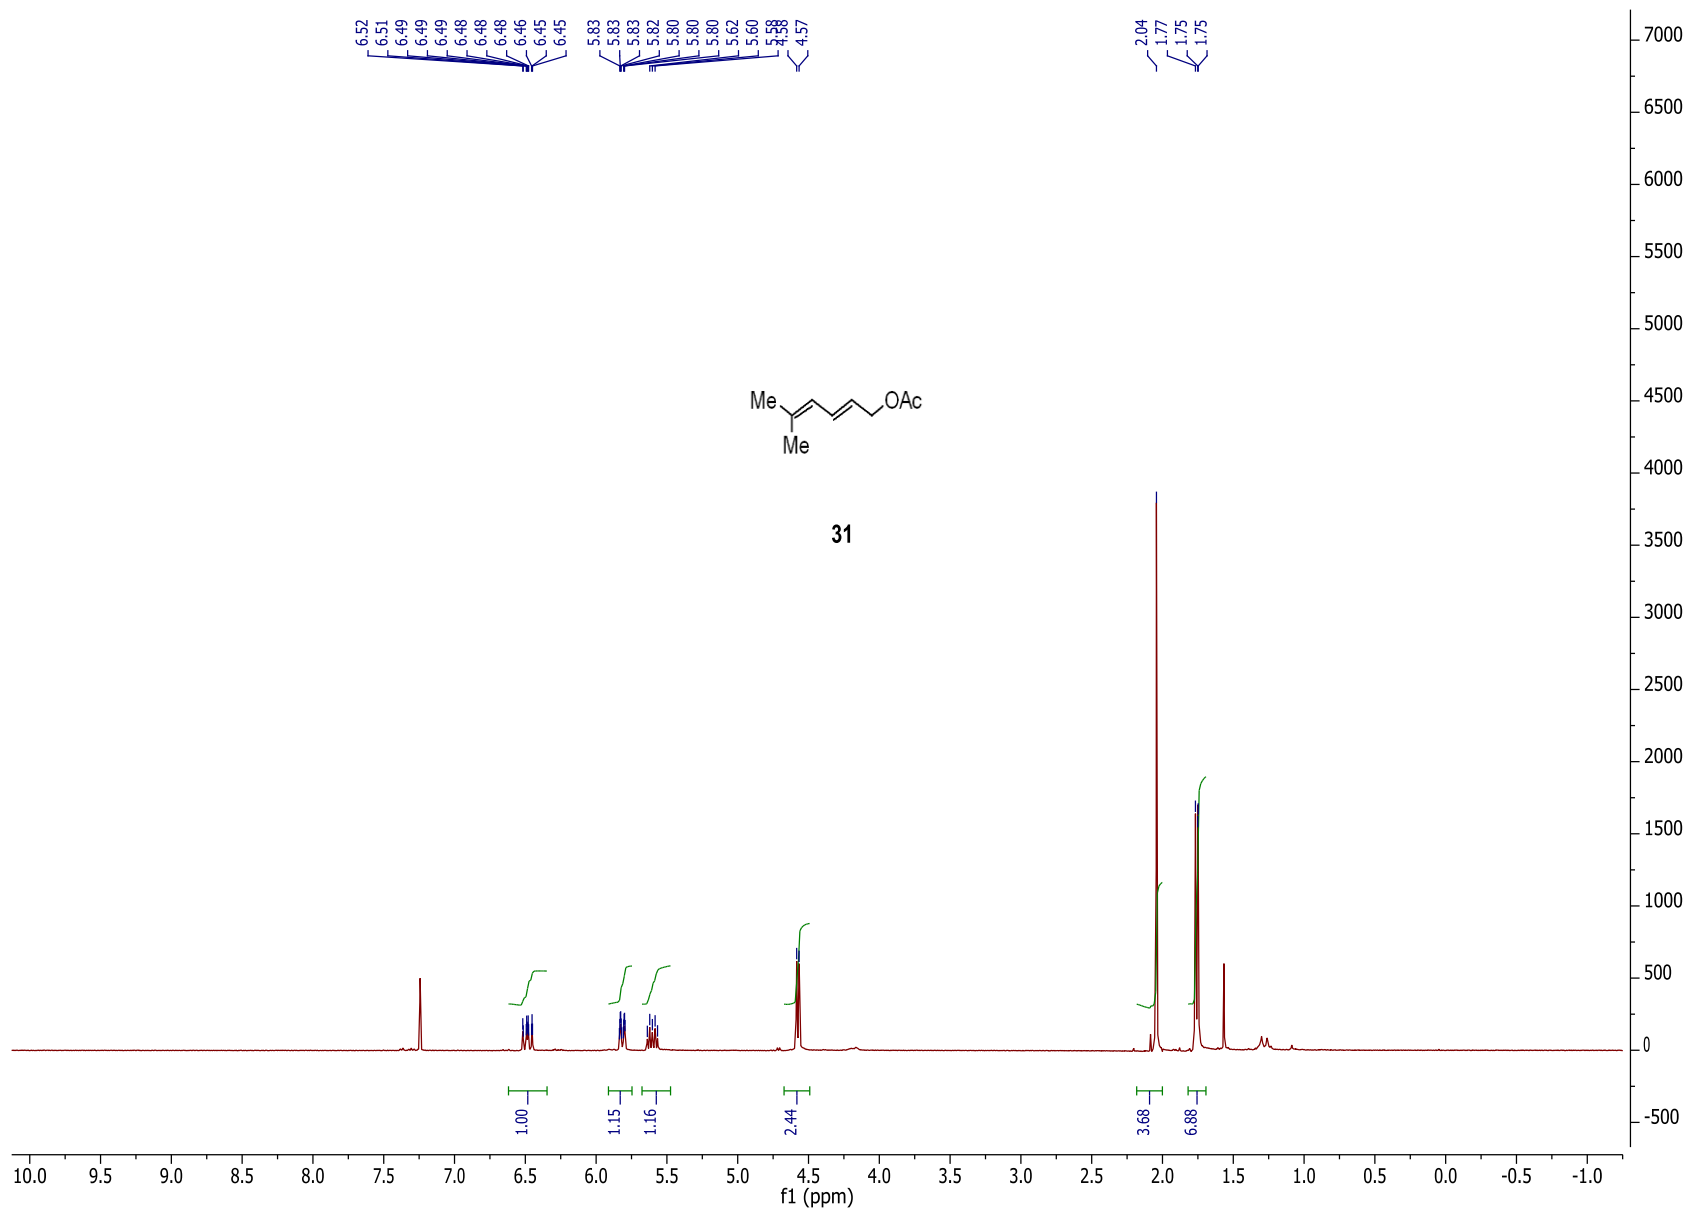

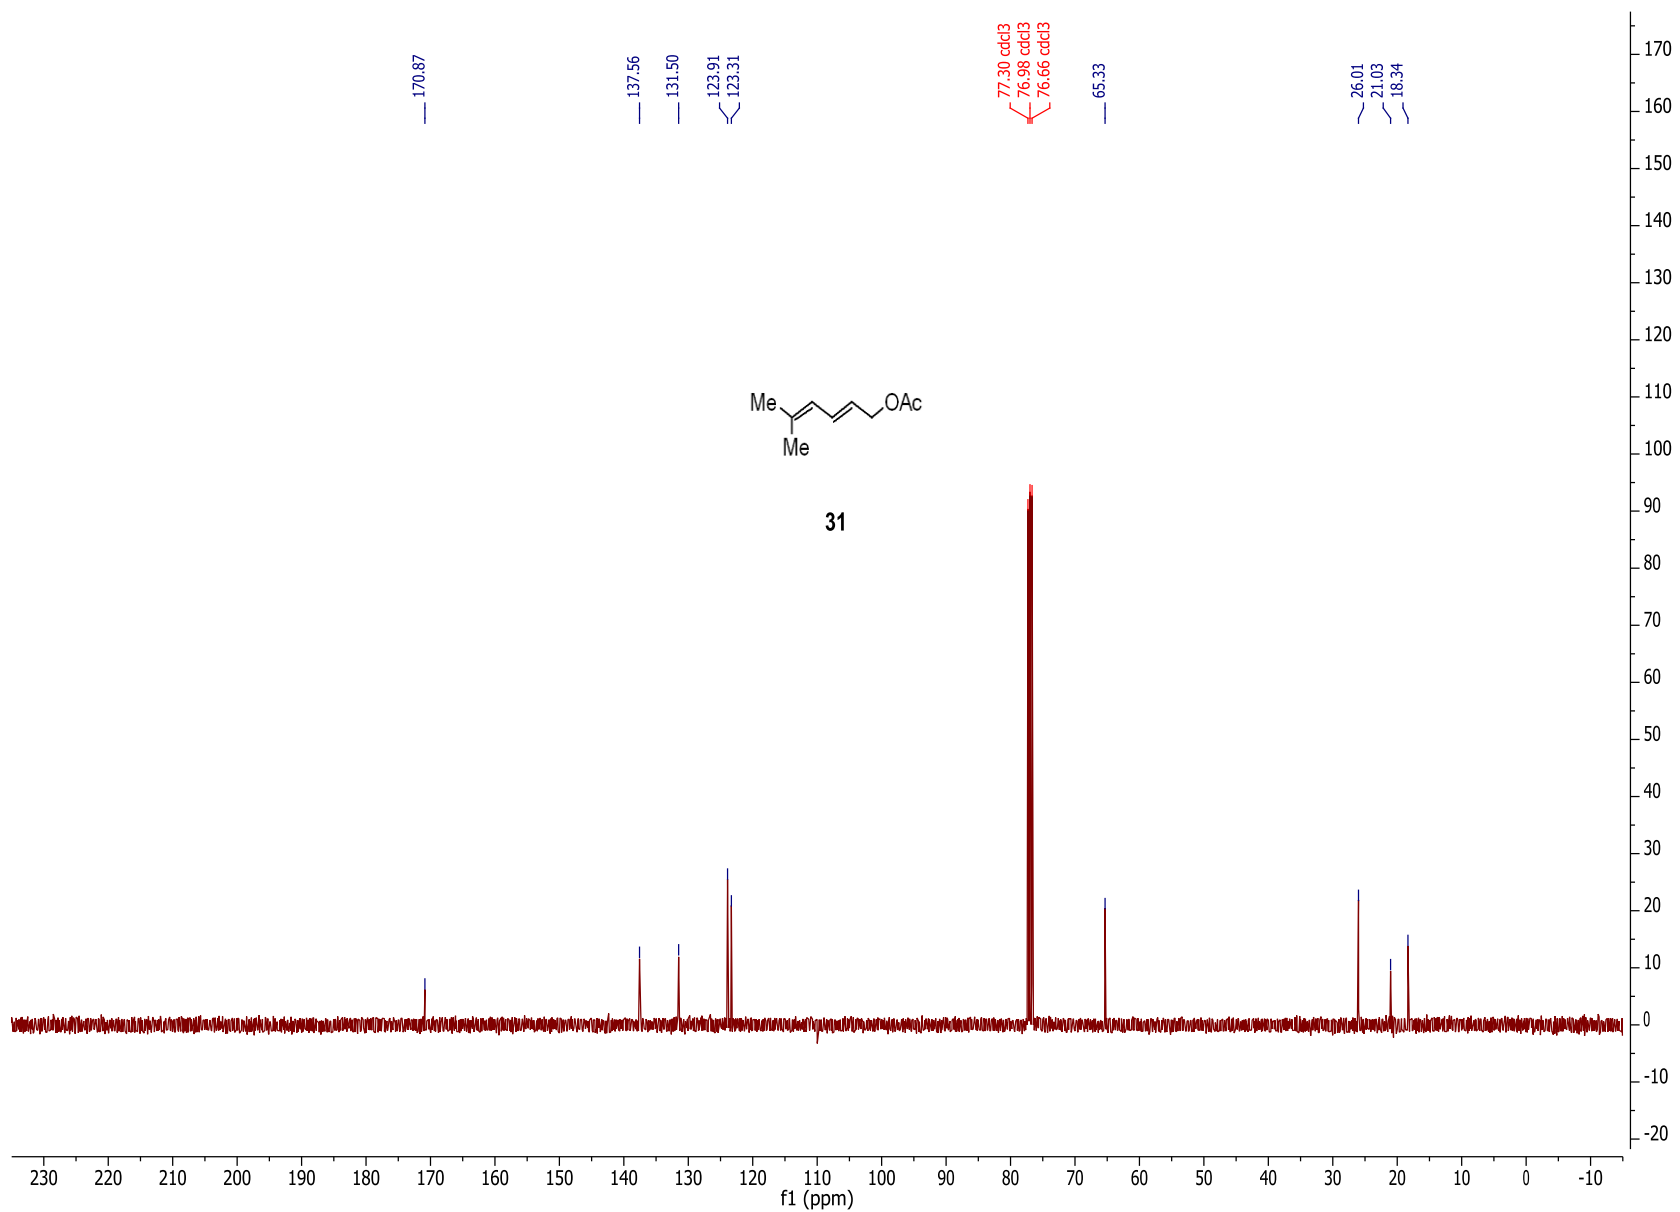

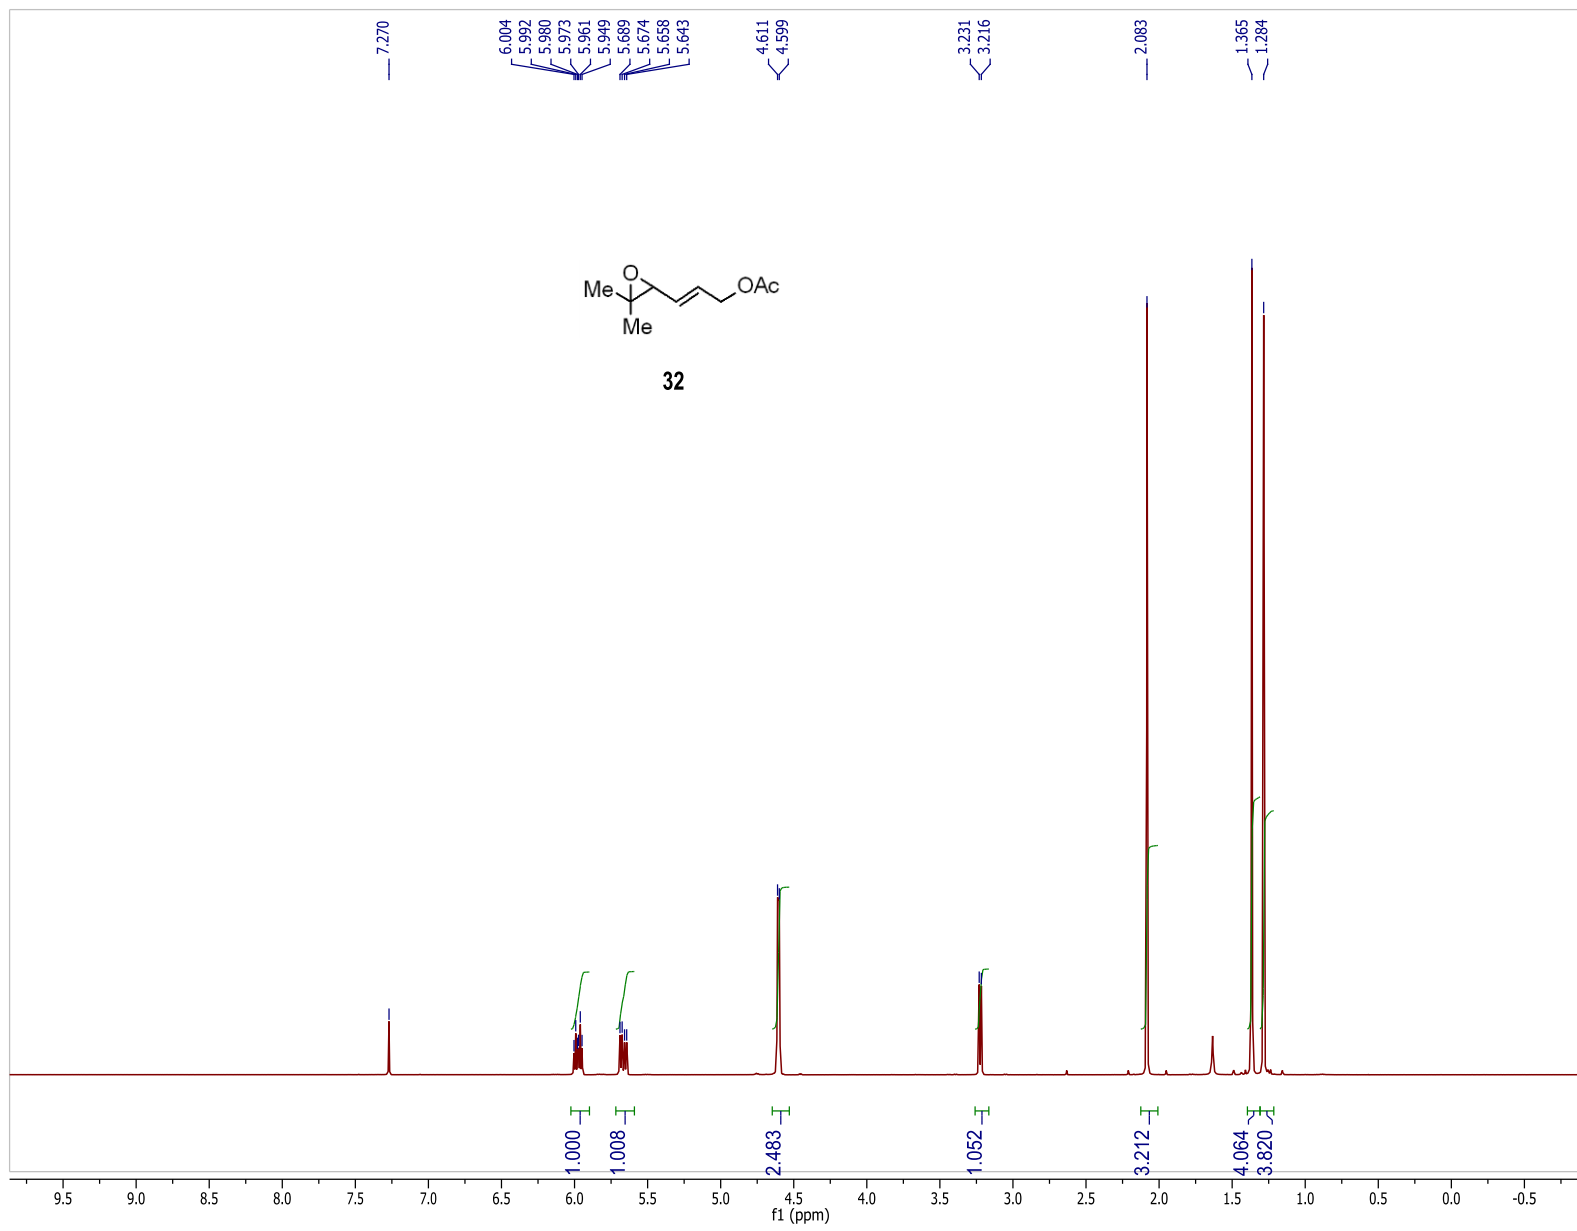

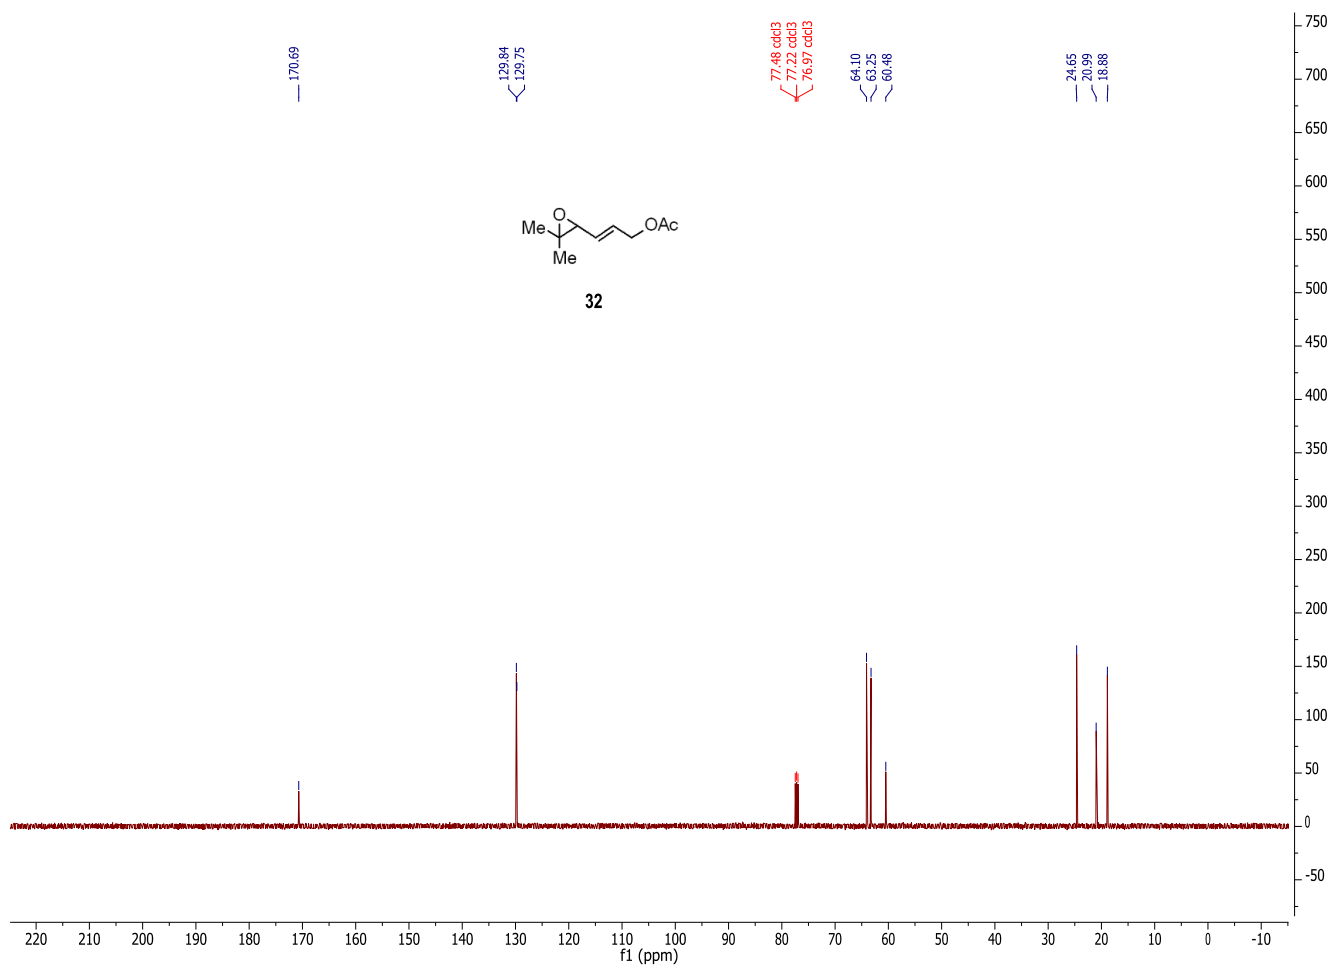



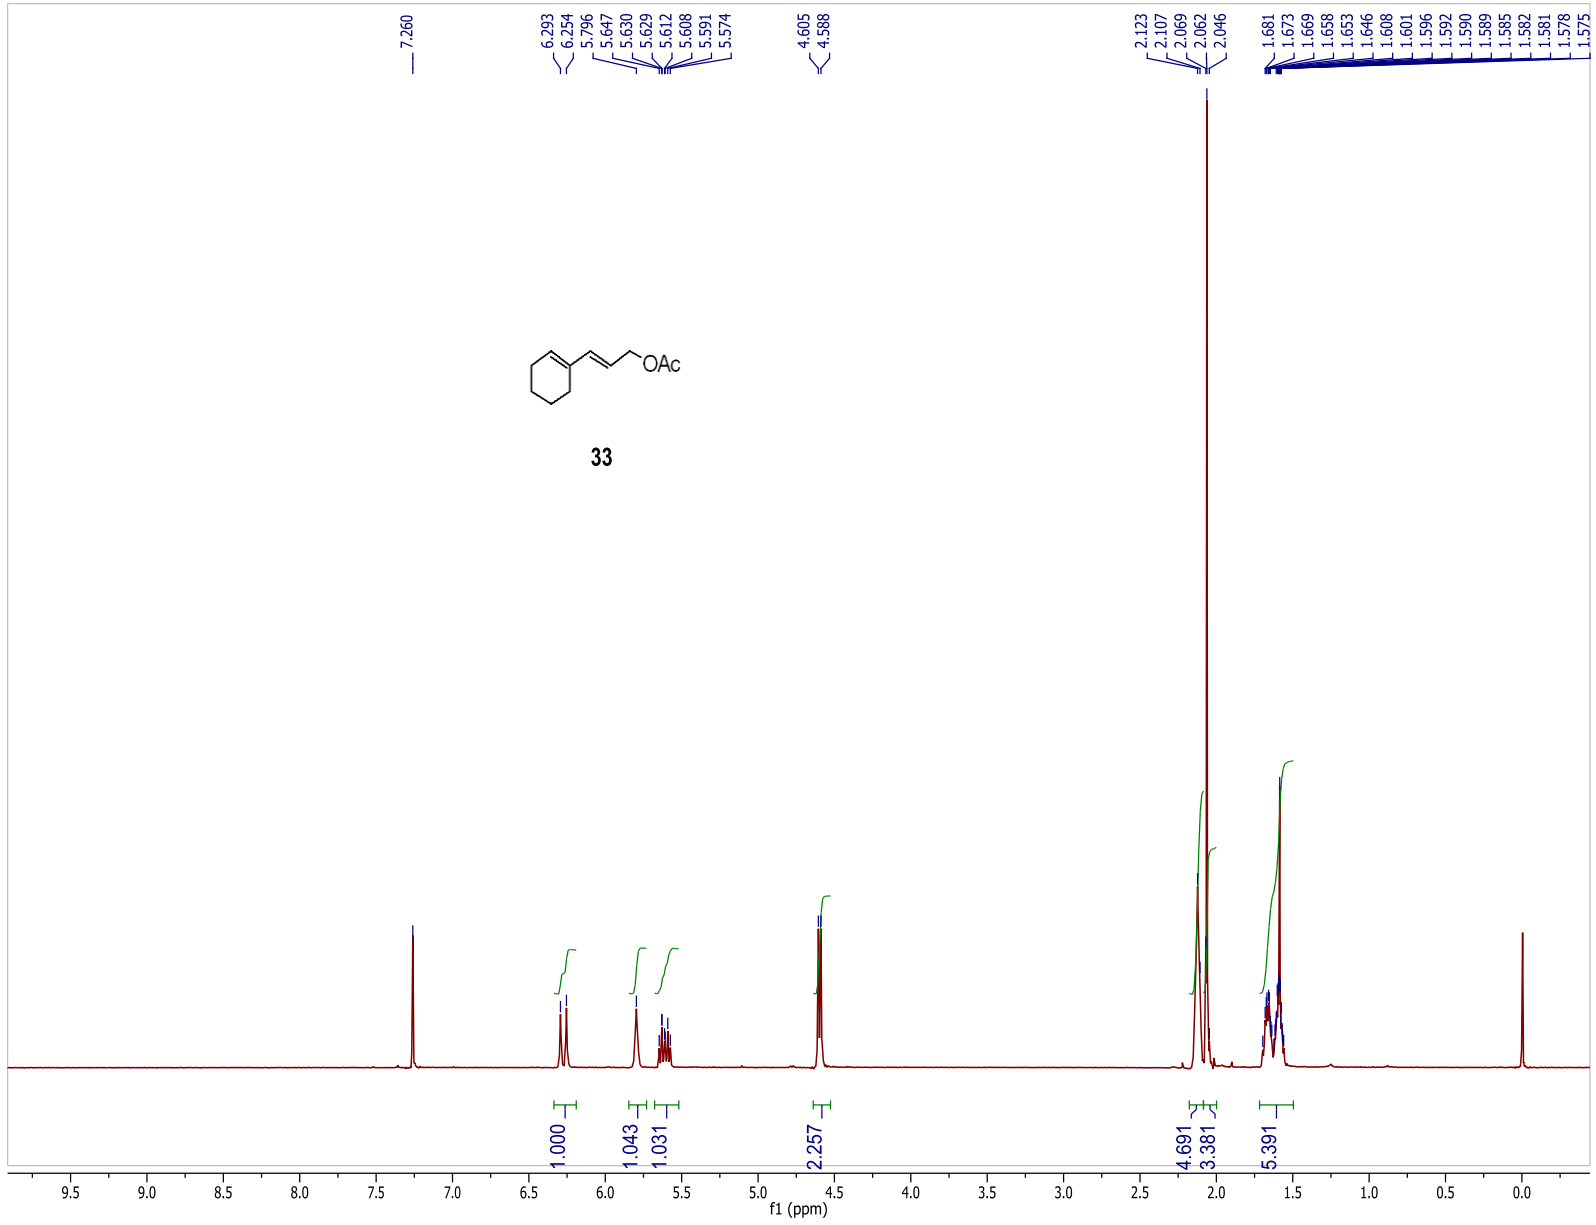

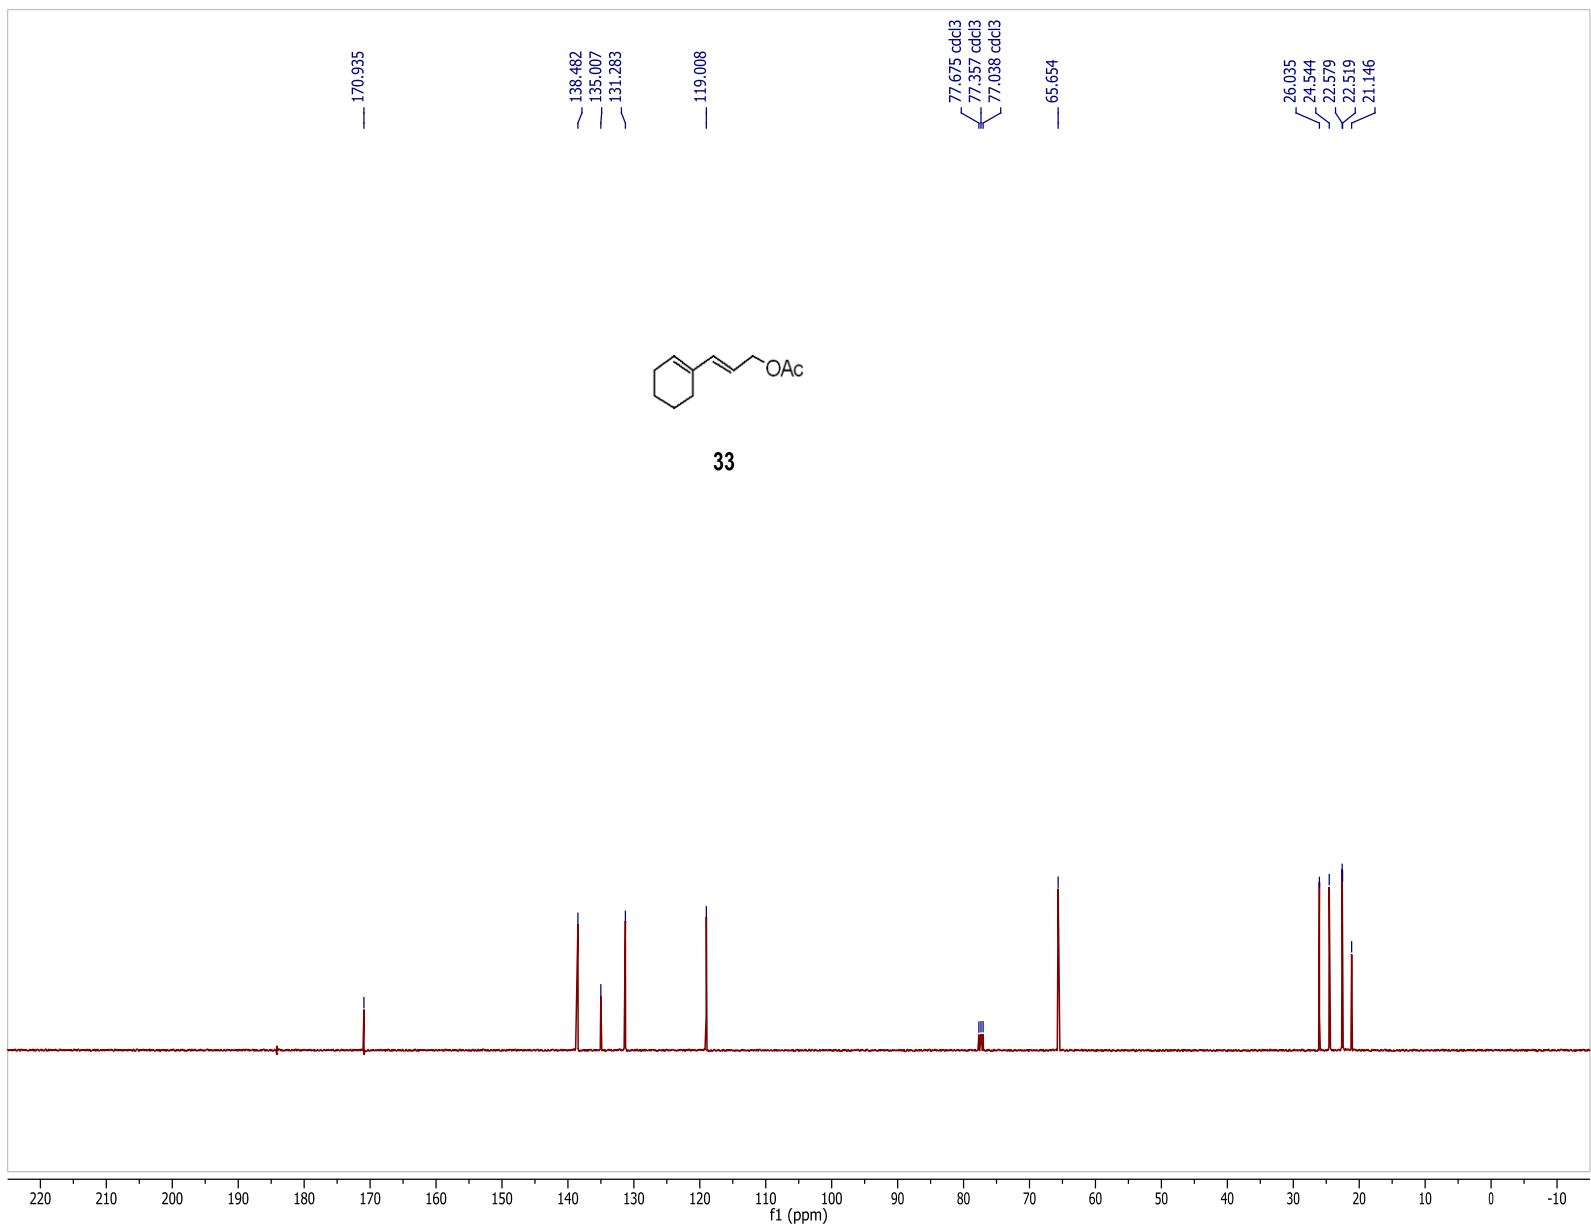

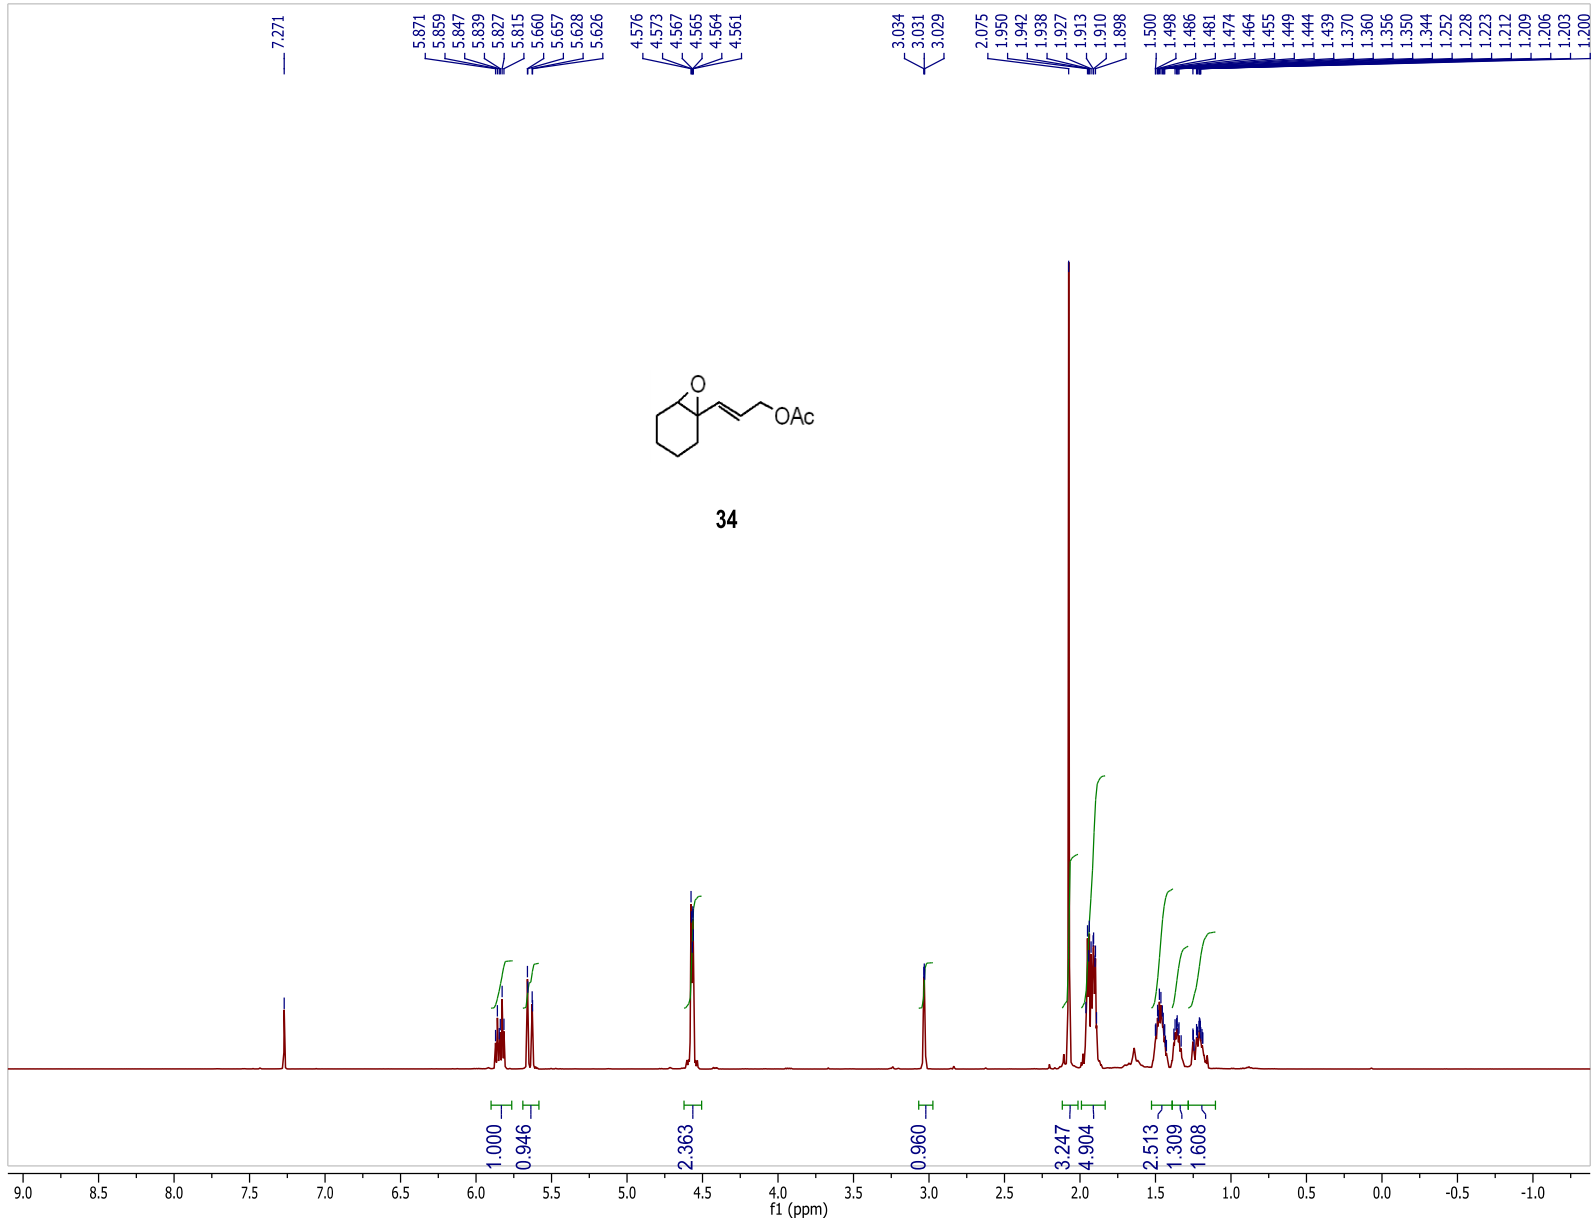

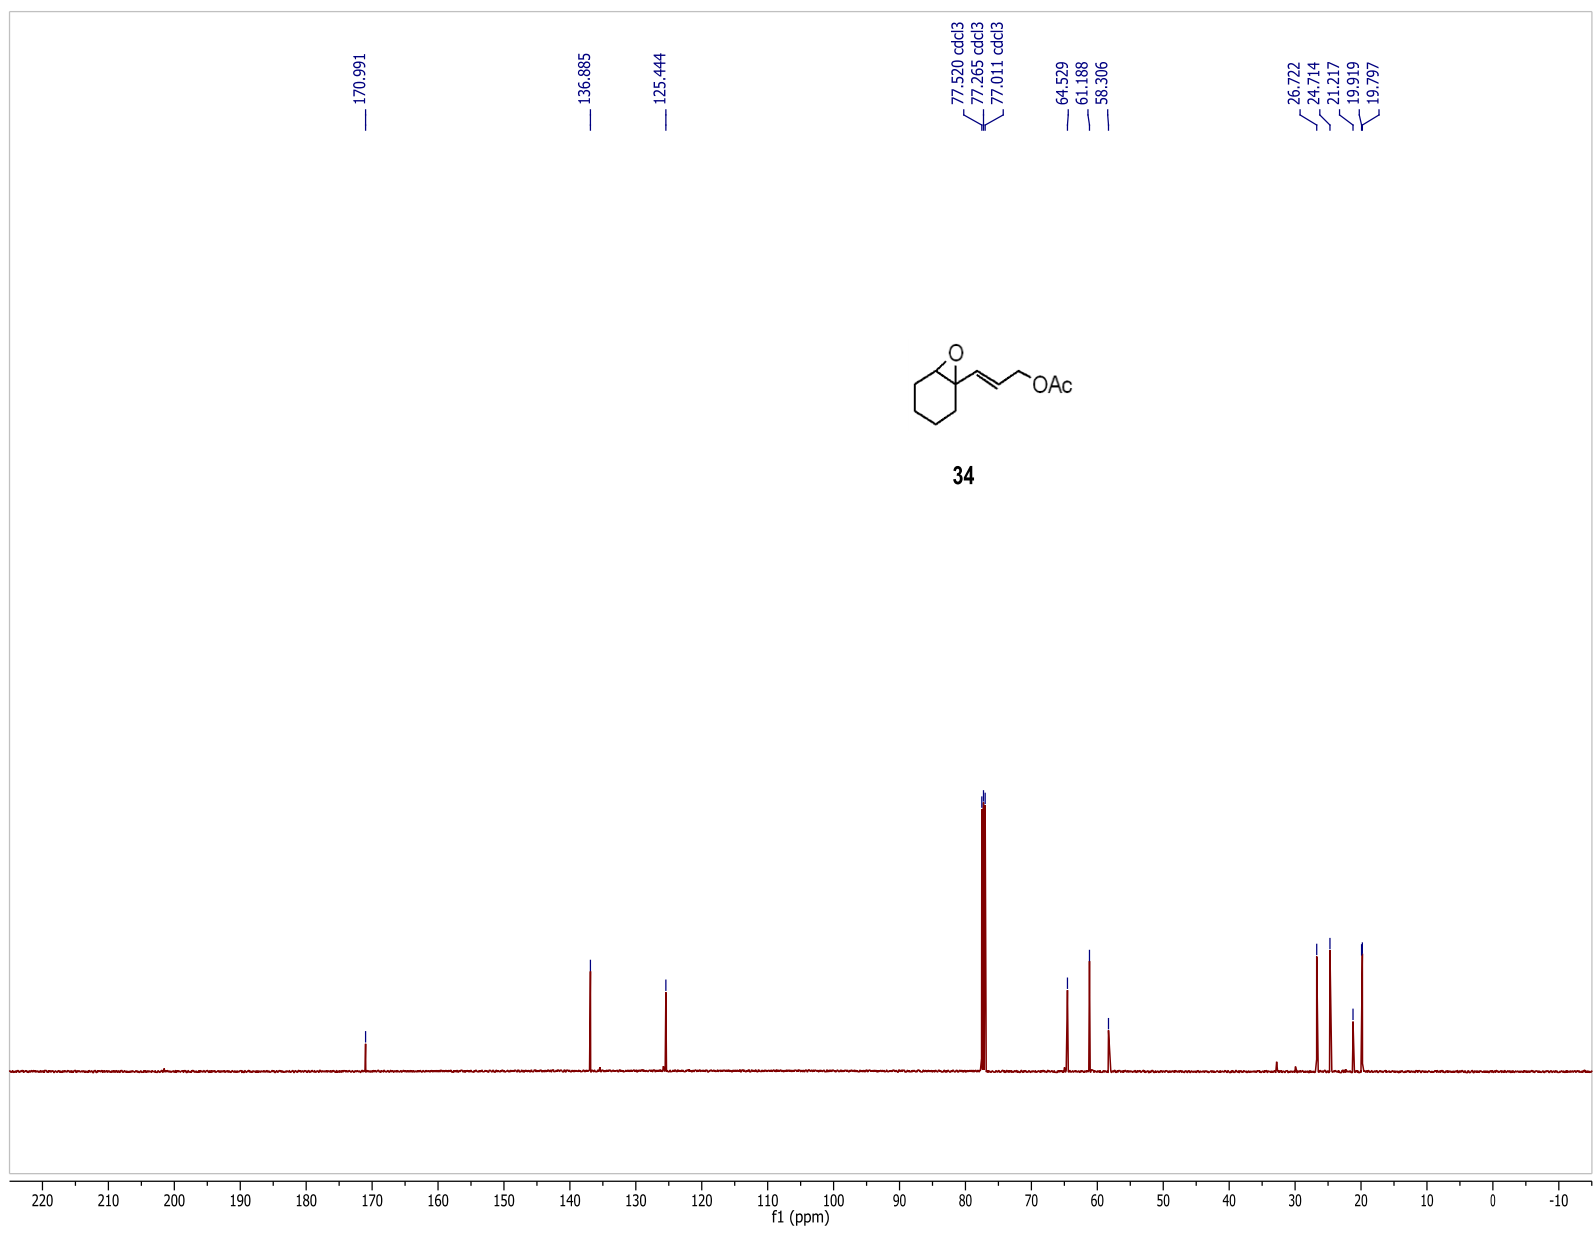

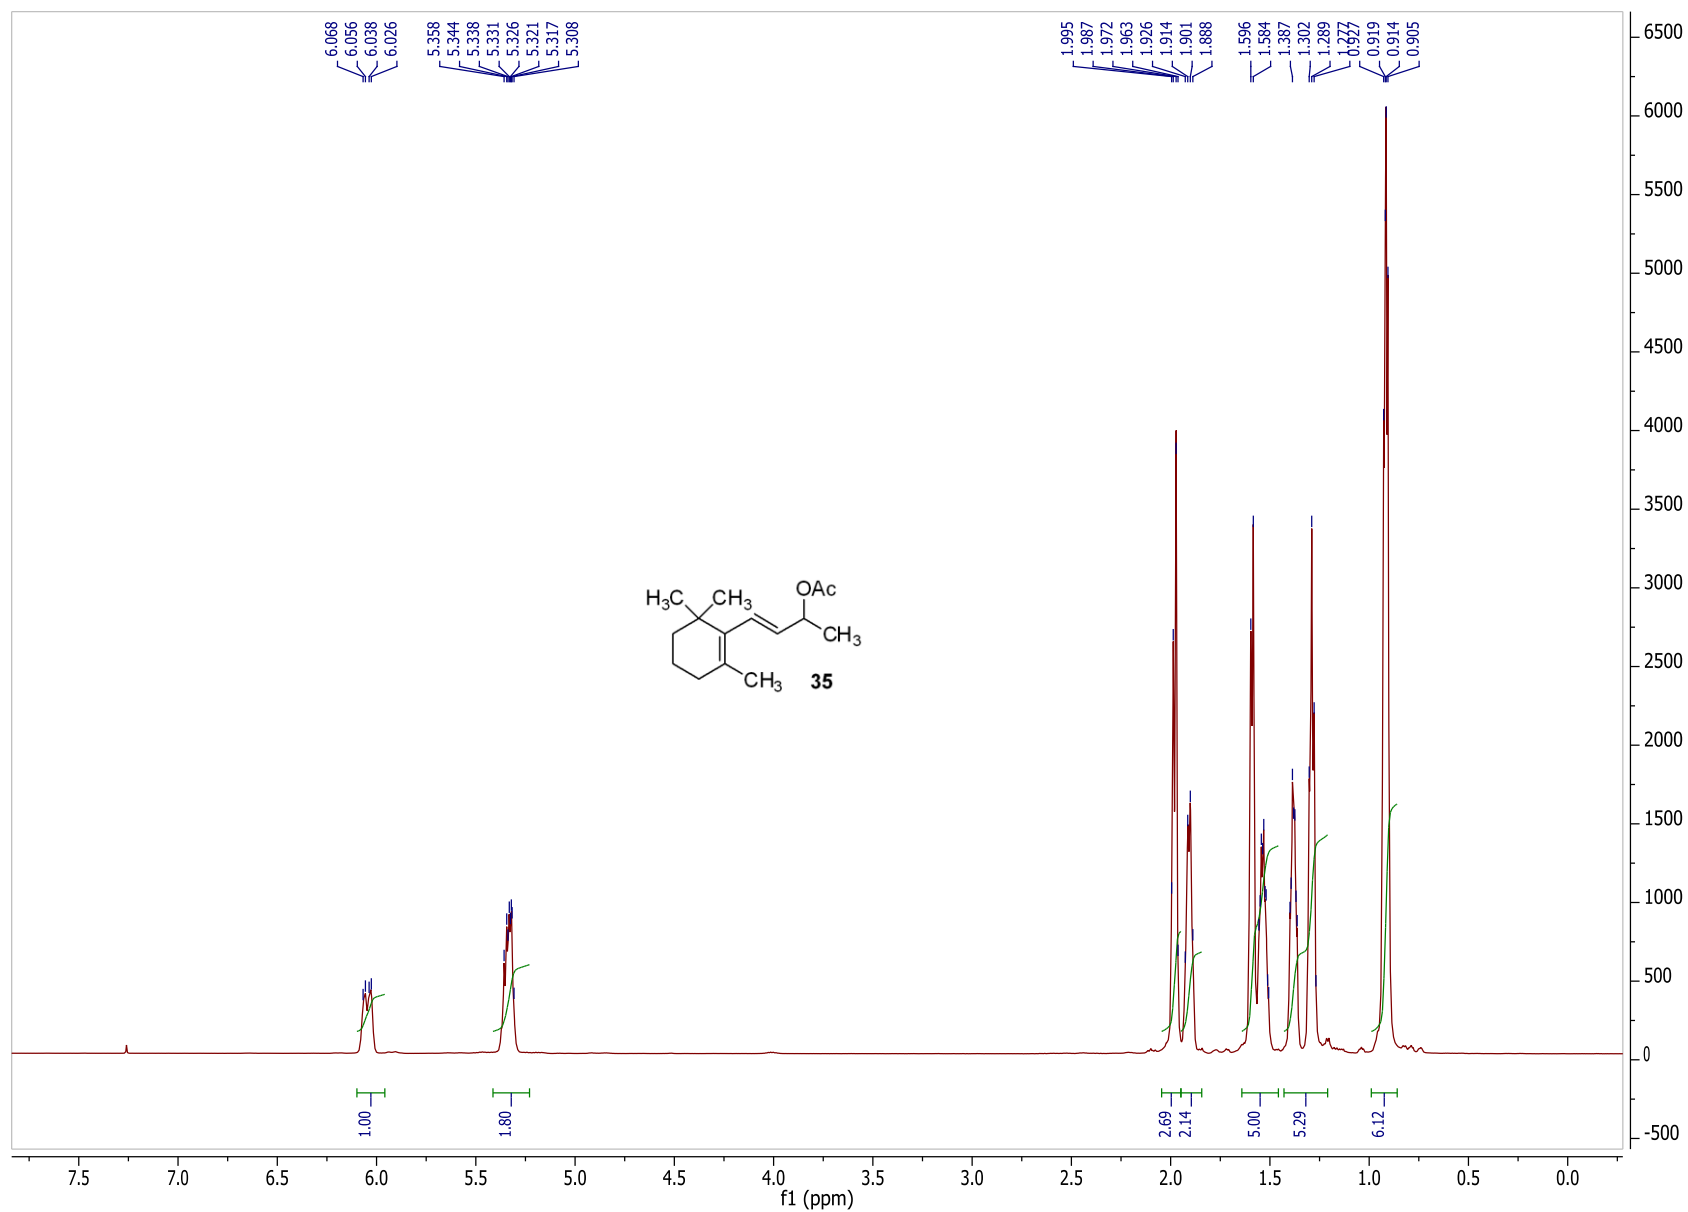

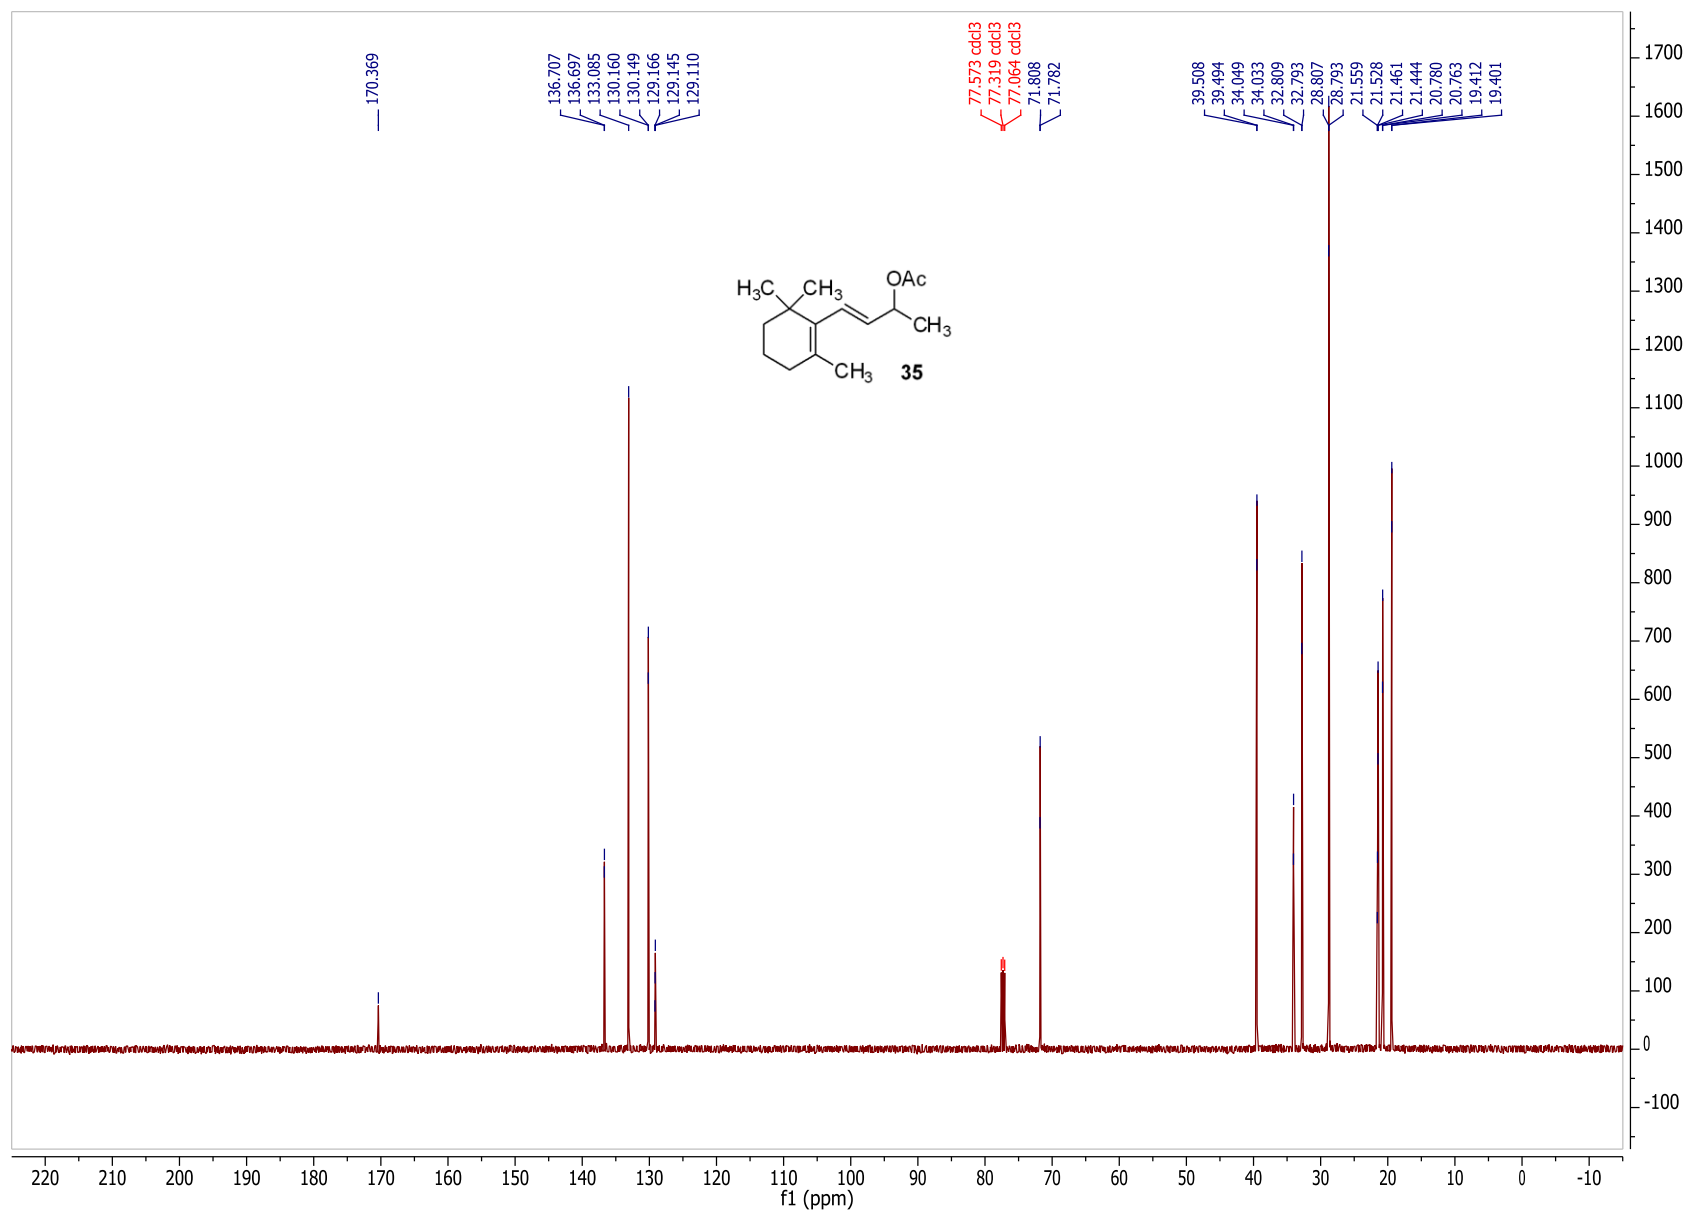

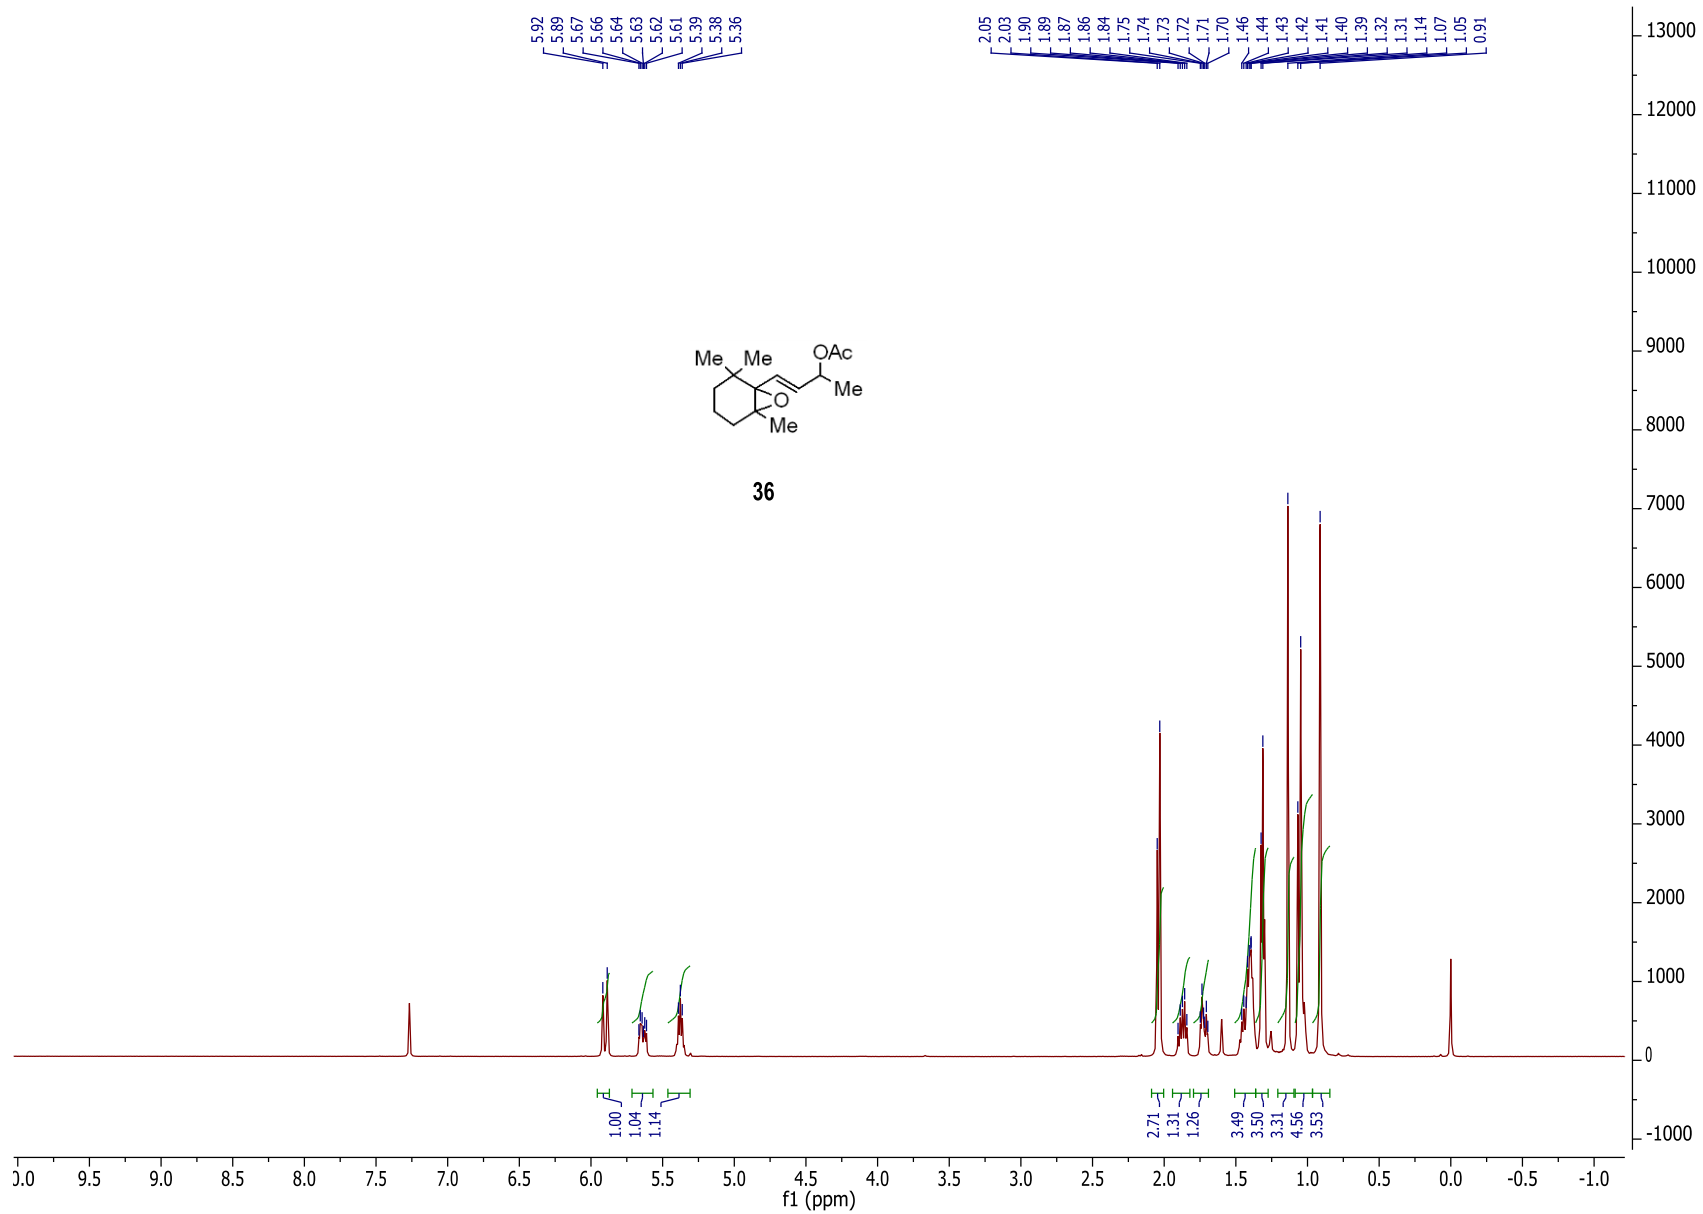

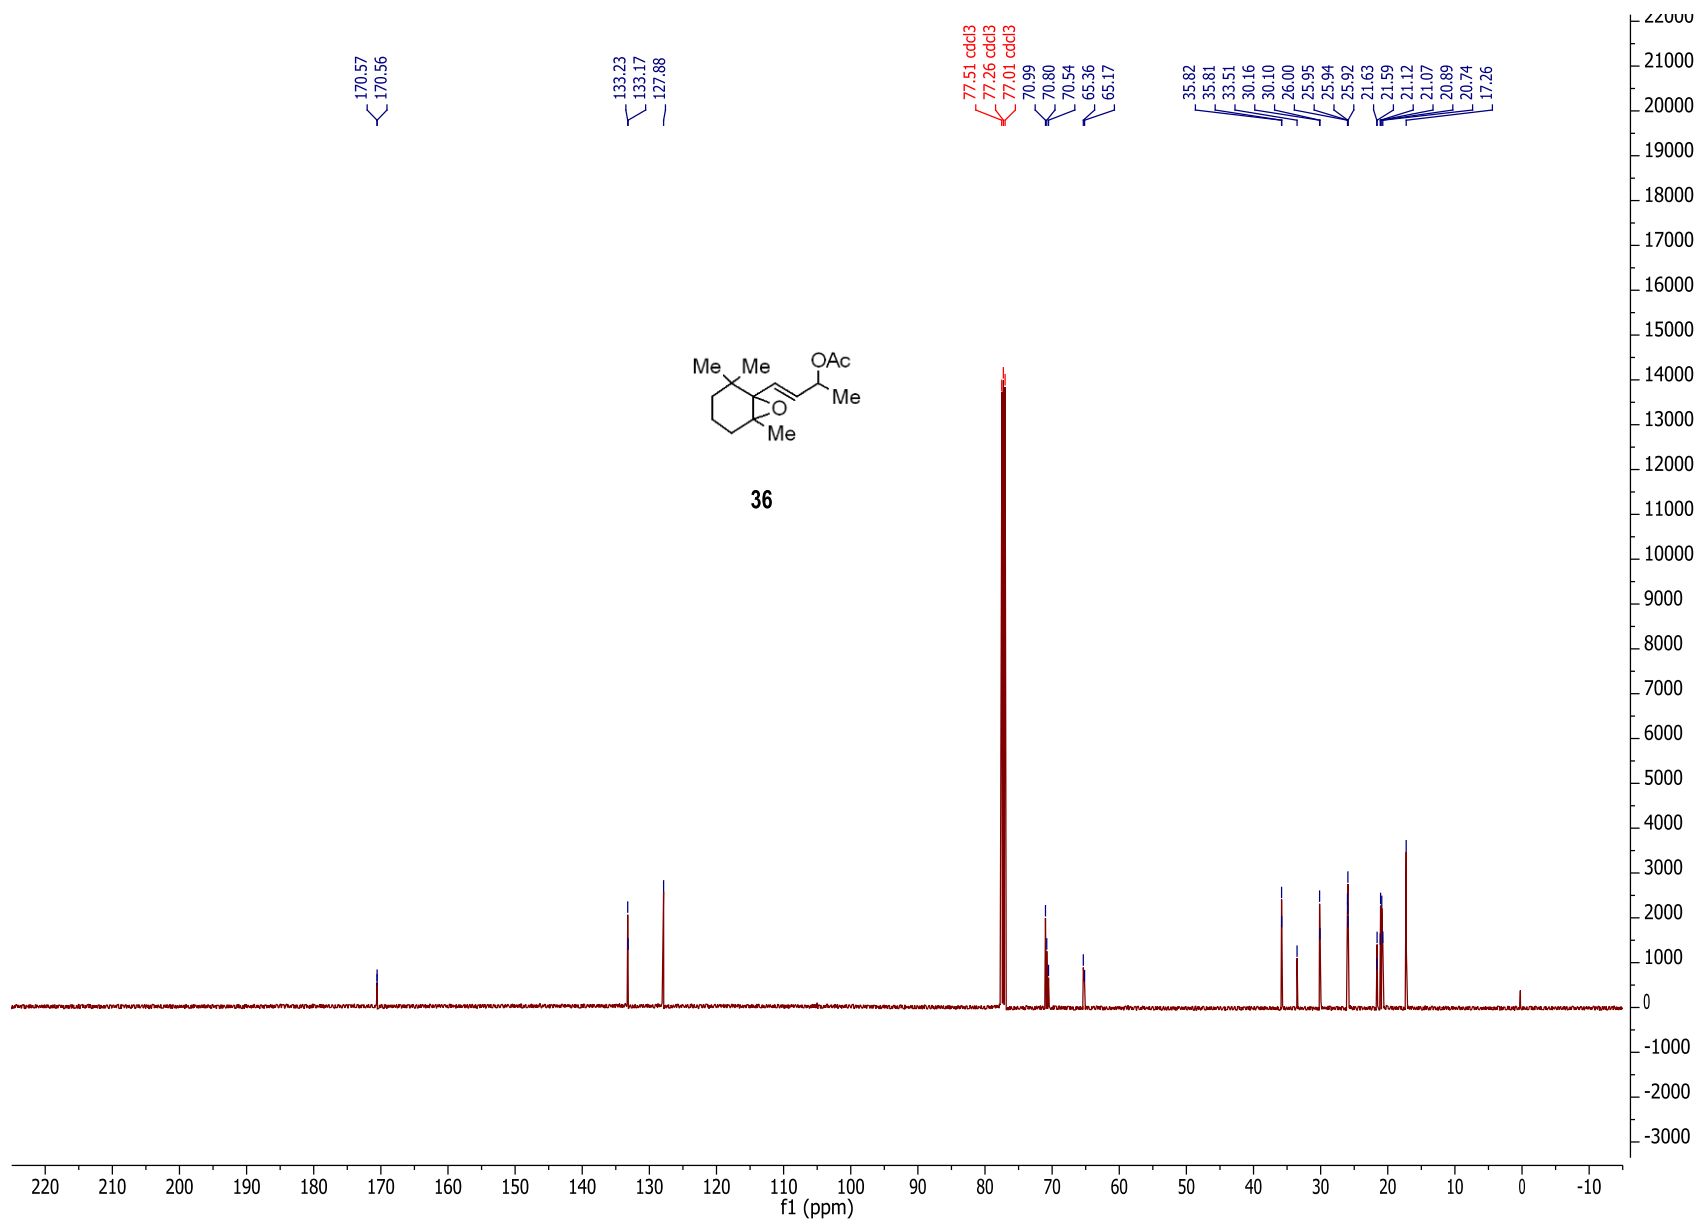



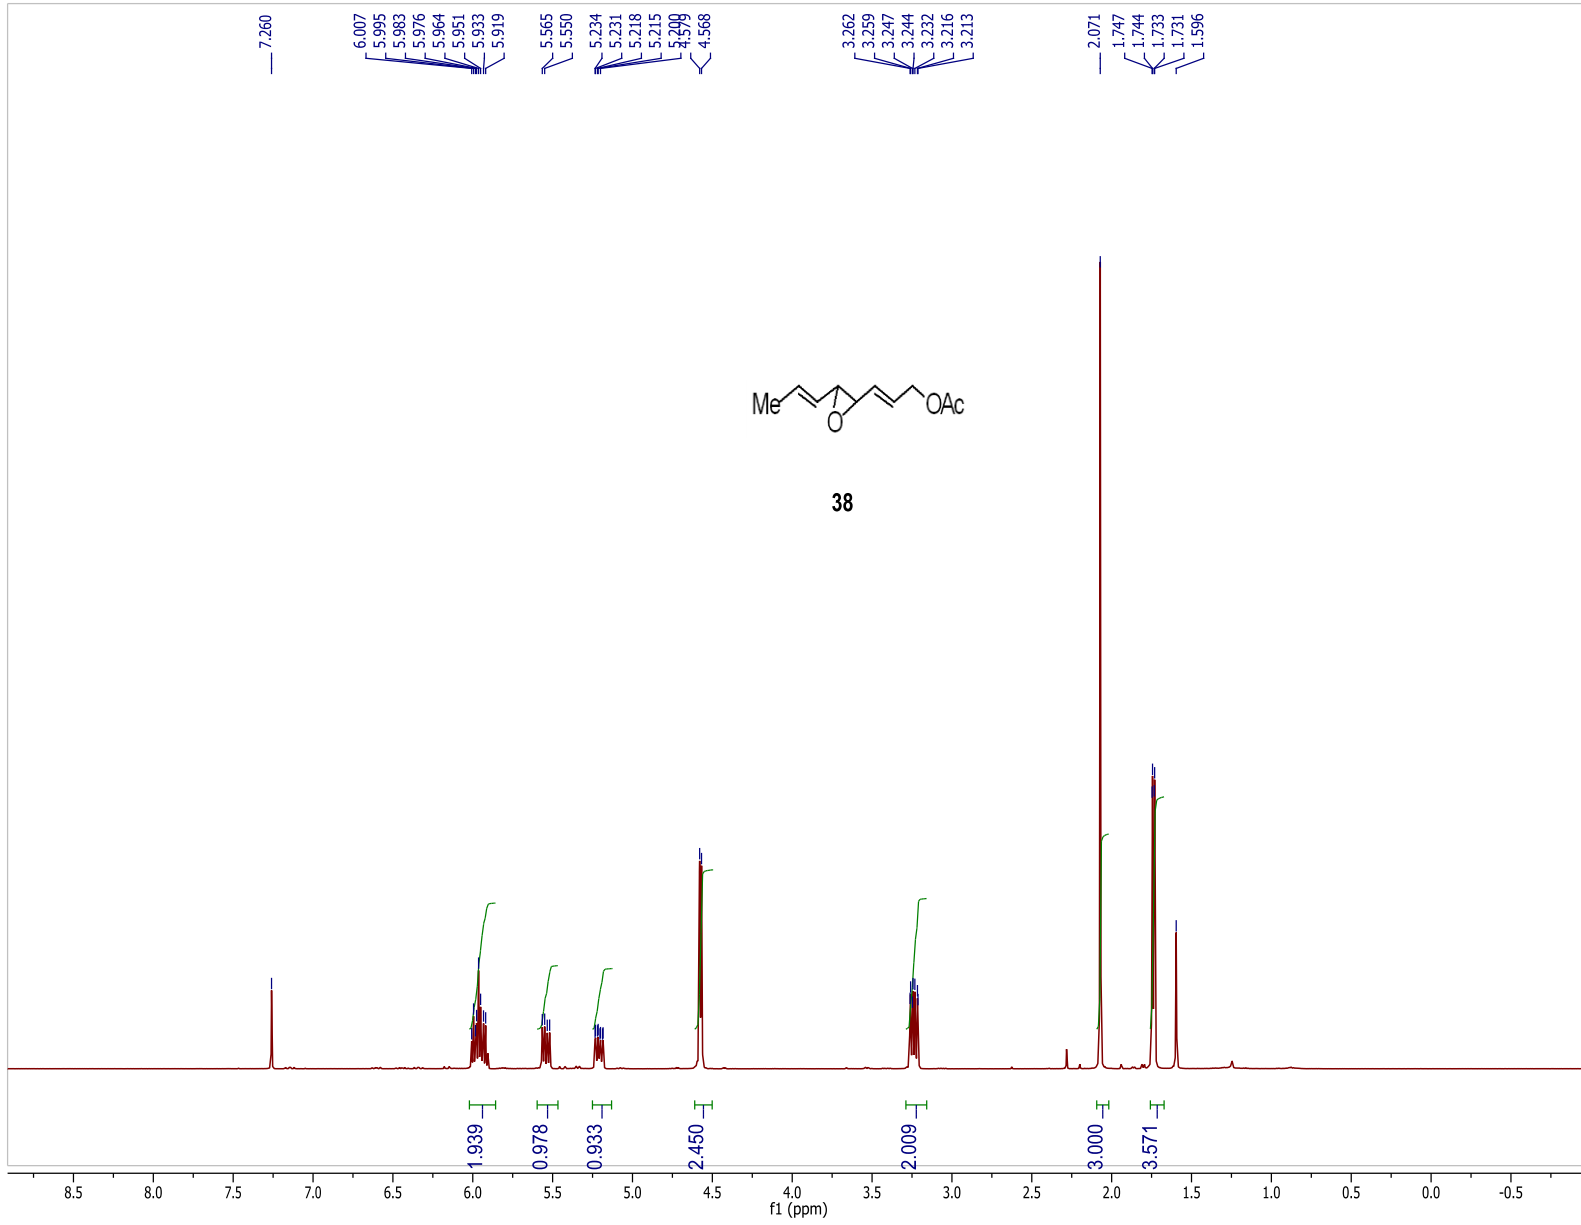

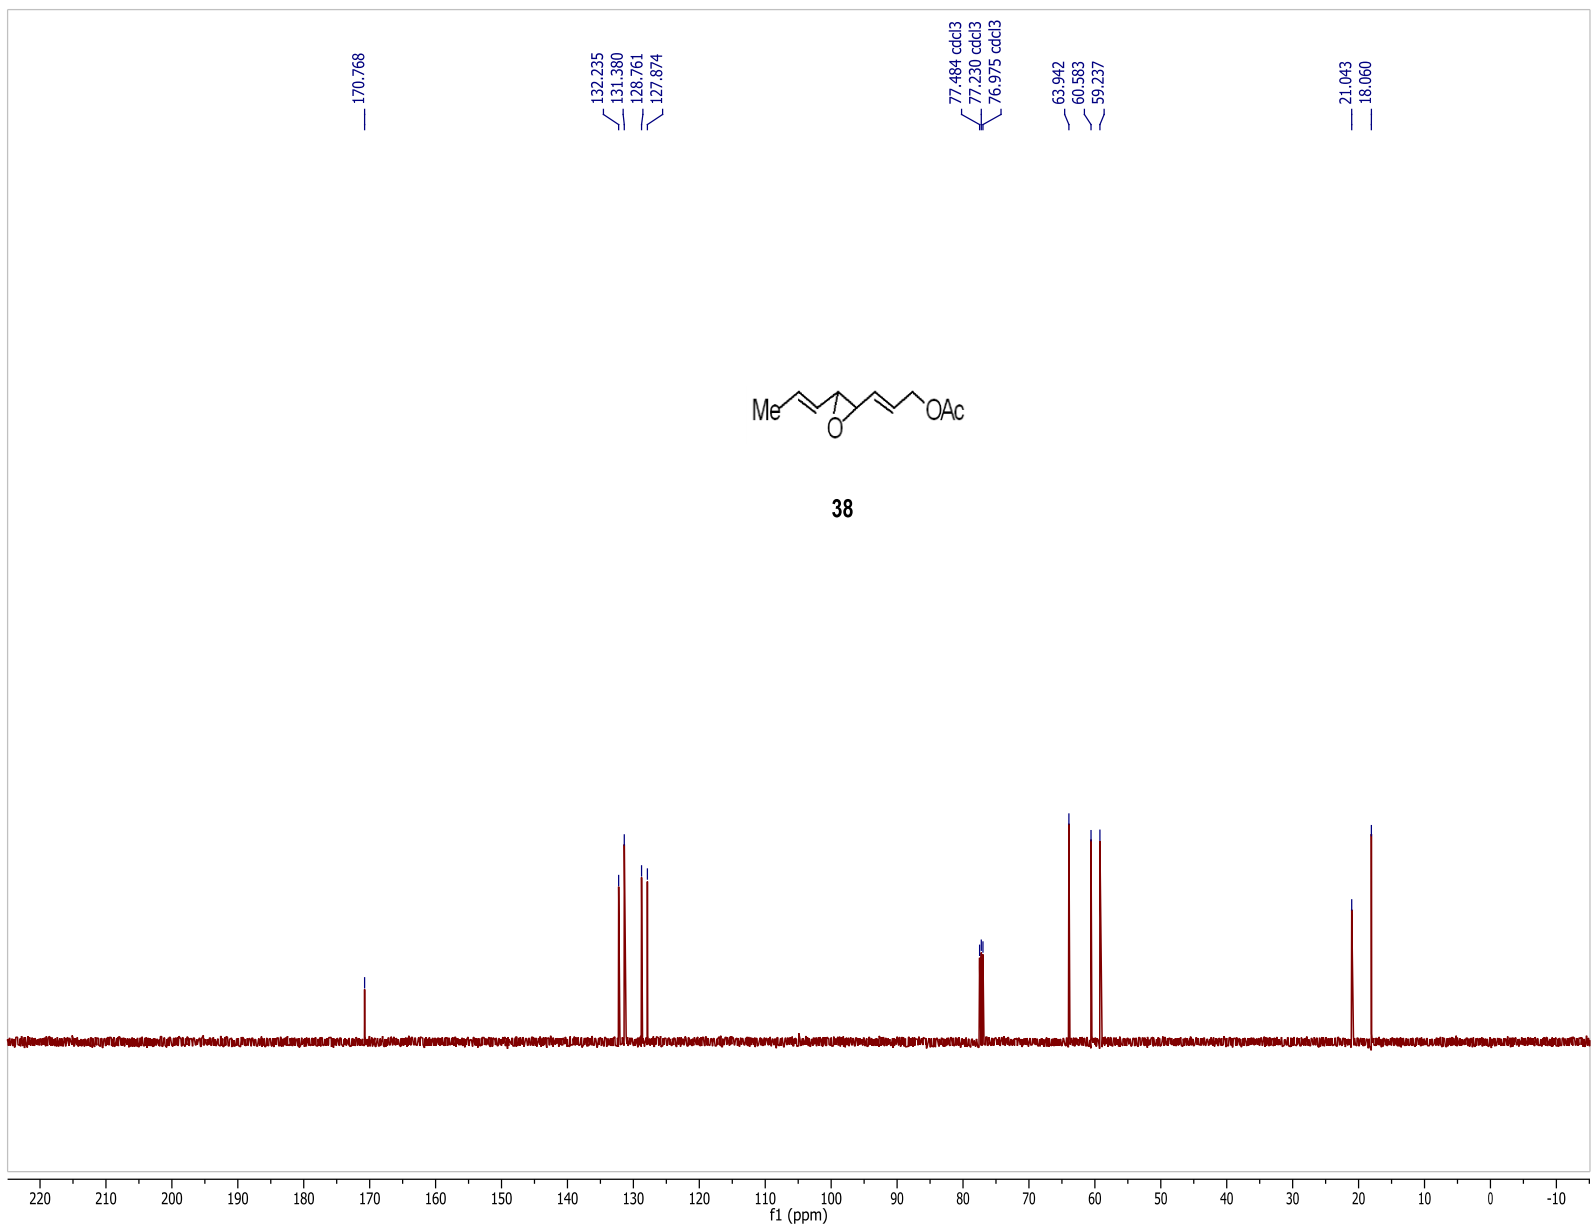

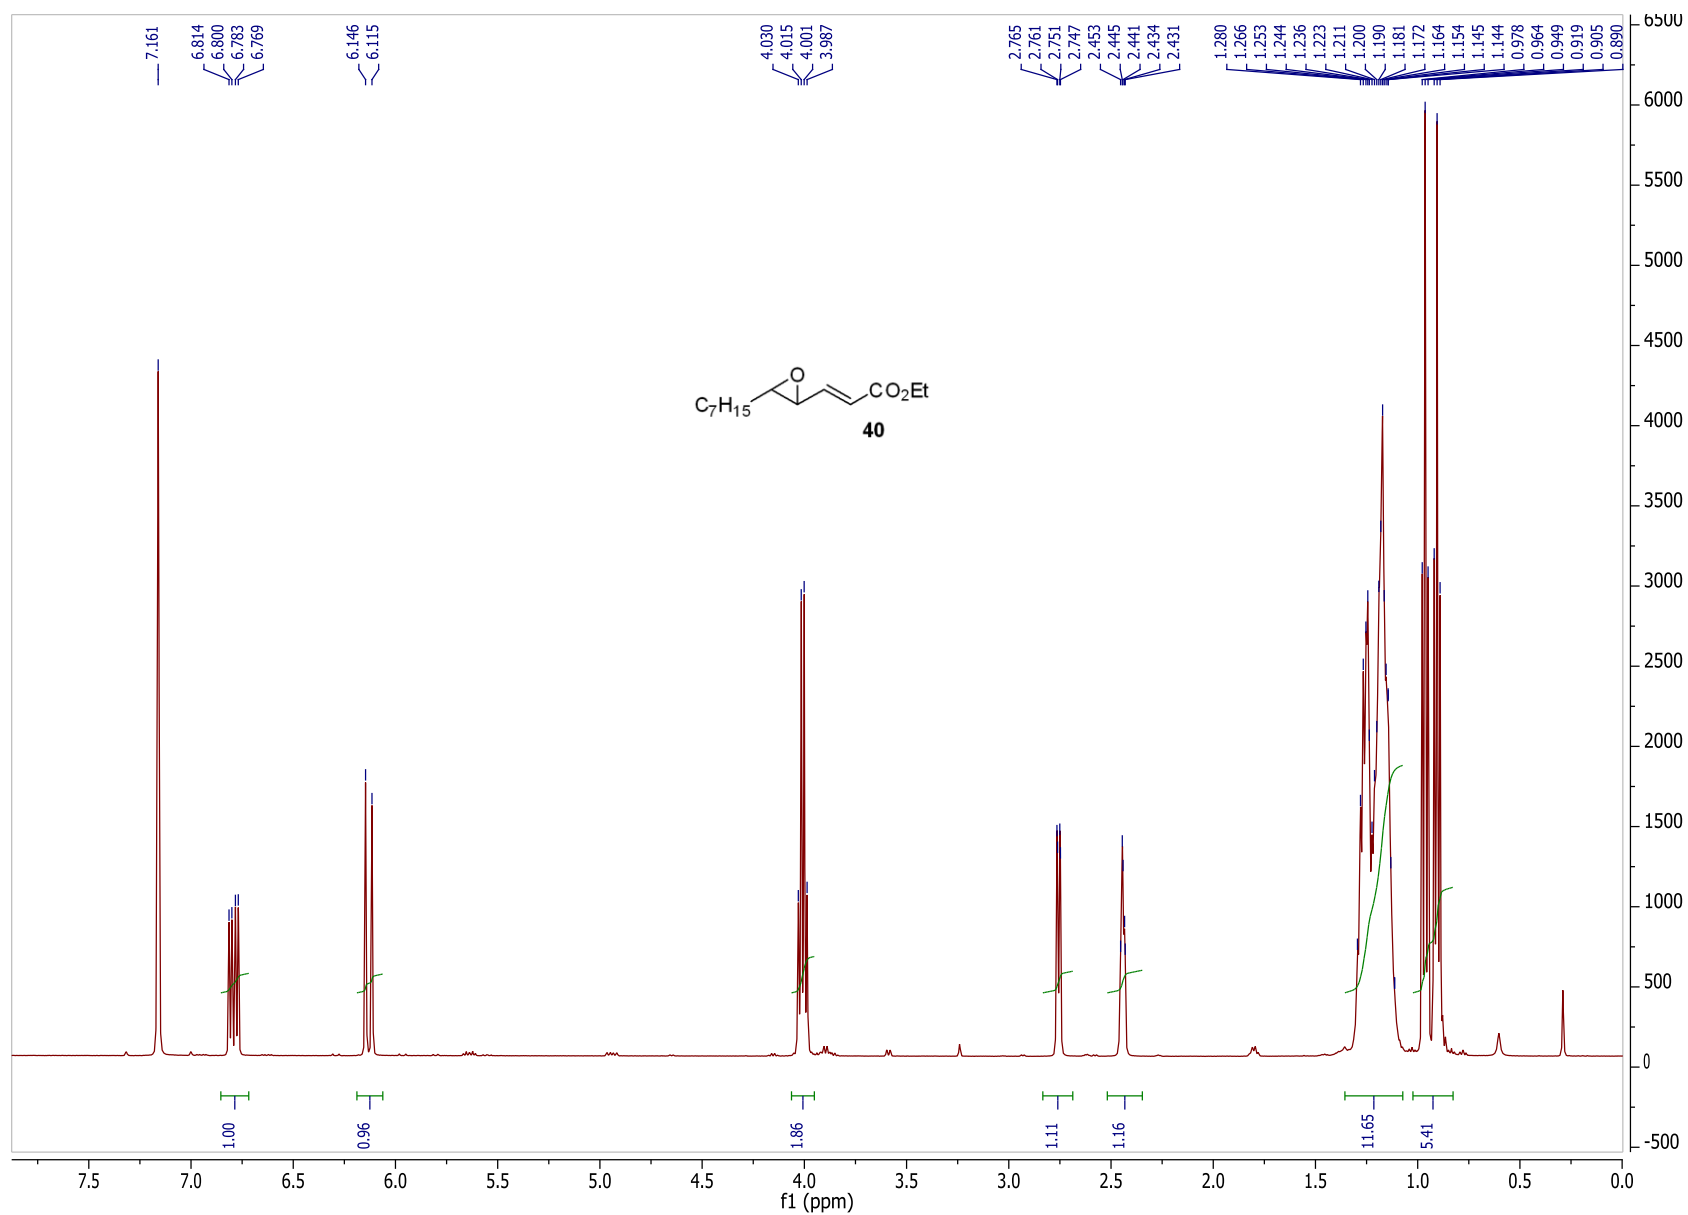

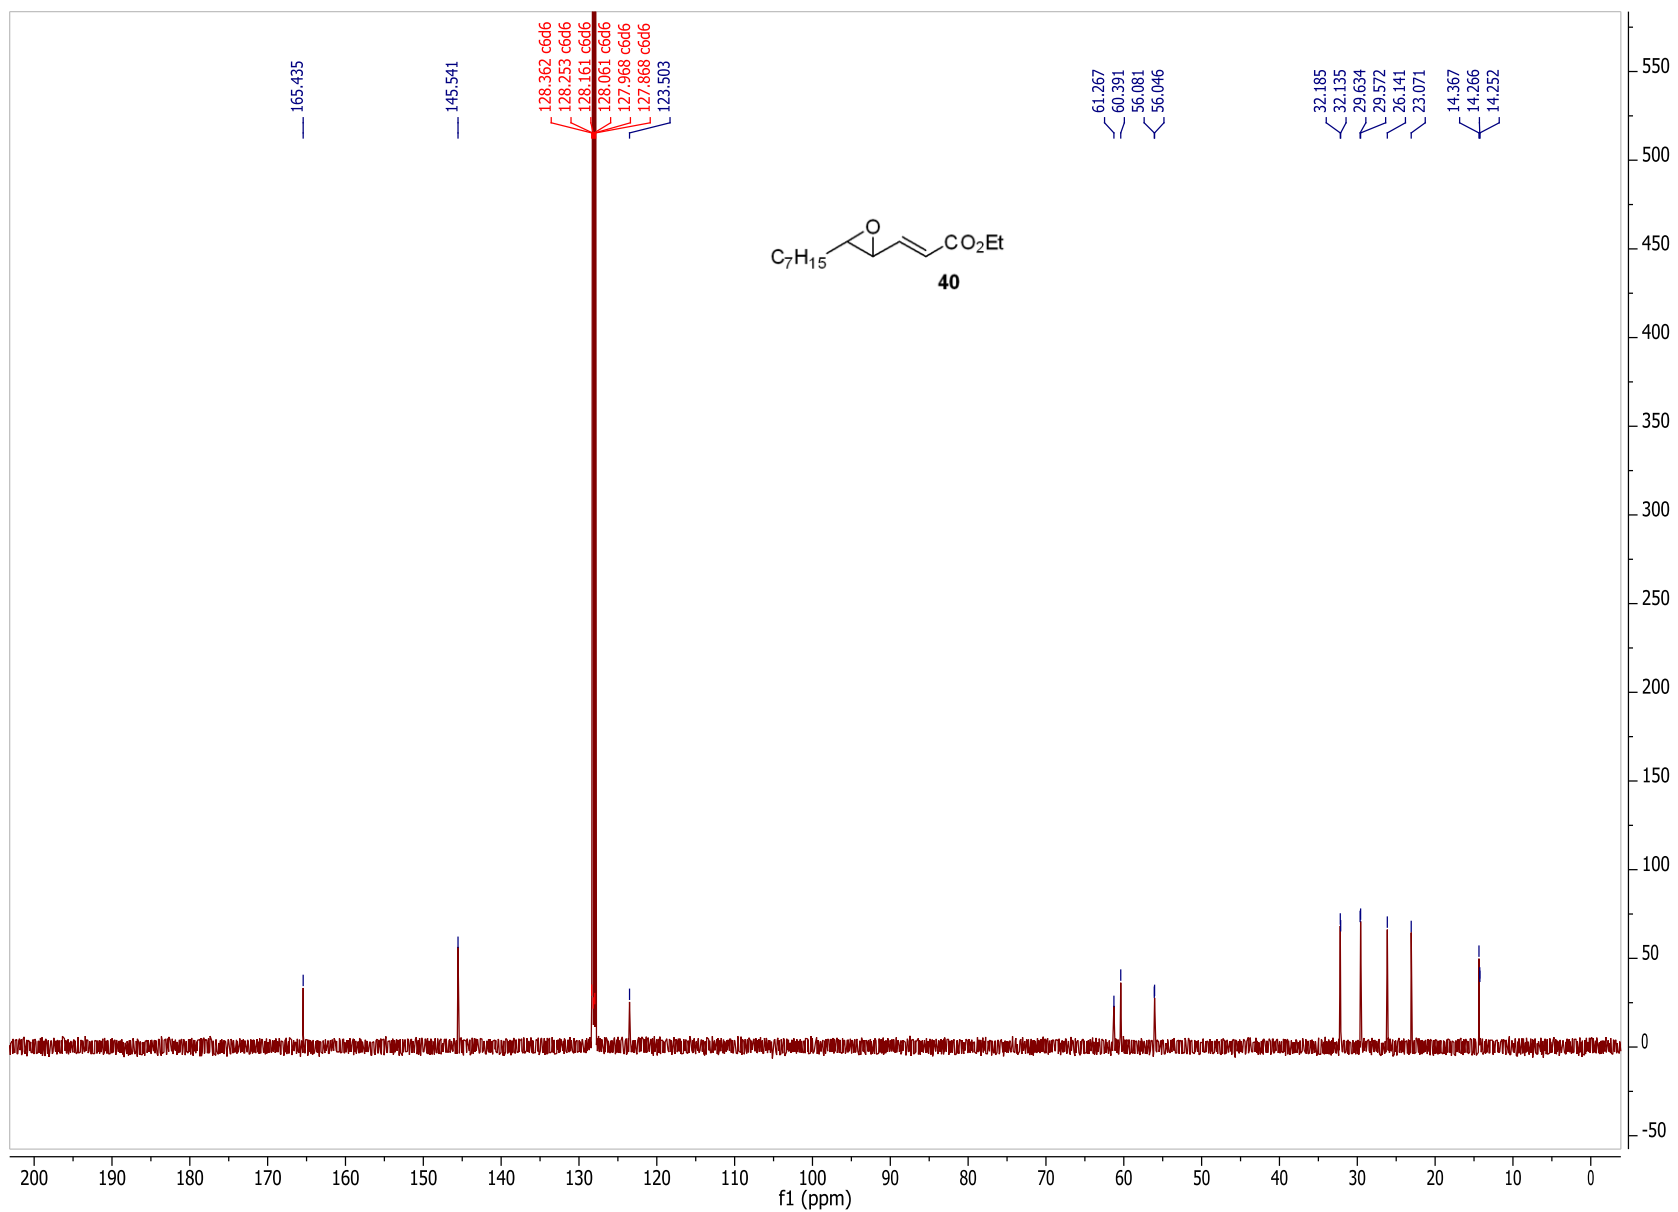

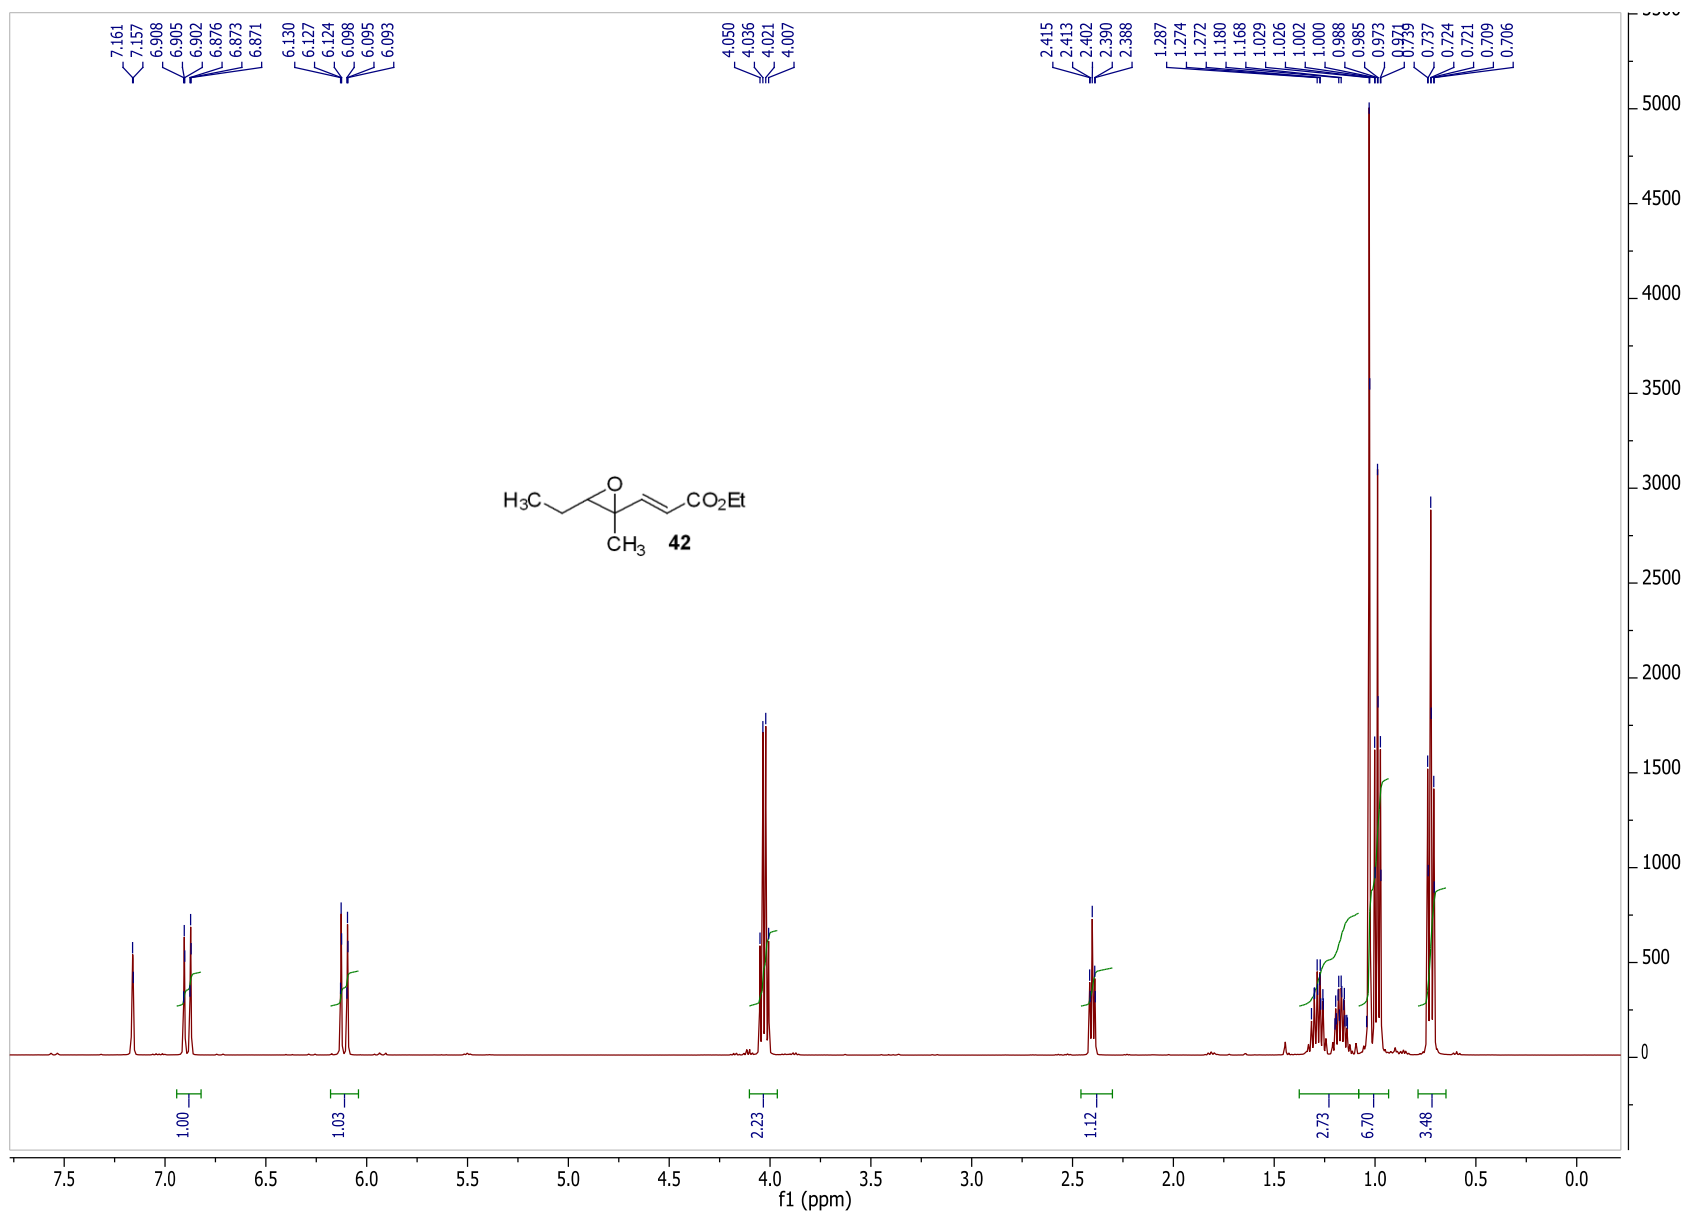

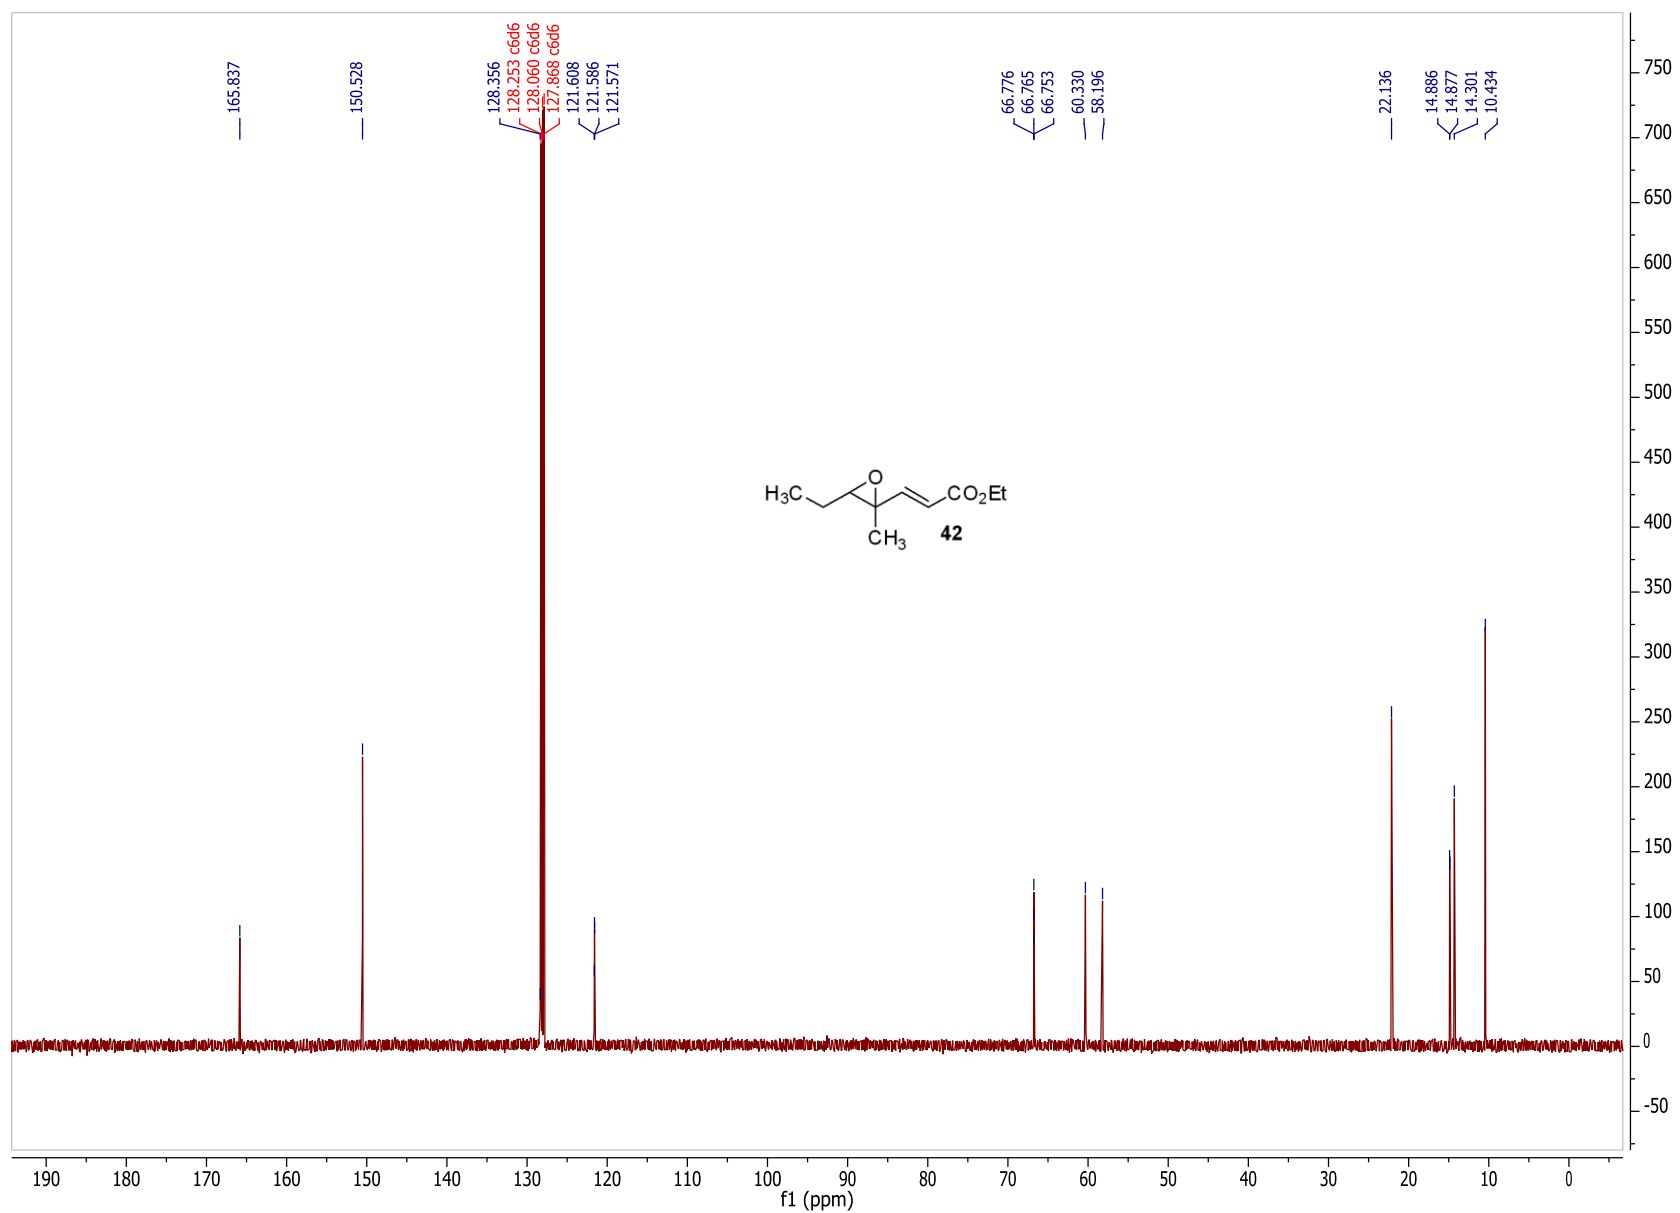

## Stereochemistry Determination:

### 1. HPLC chromatogram of standard chiral epoxide.

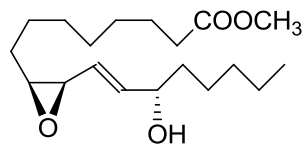

Source: Larodan Fine Chemicals,  
Cat. no.: 24-1802-12b, Lot. No.: H-074

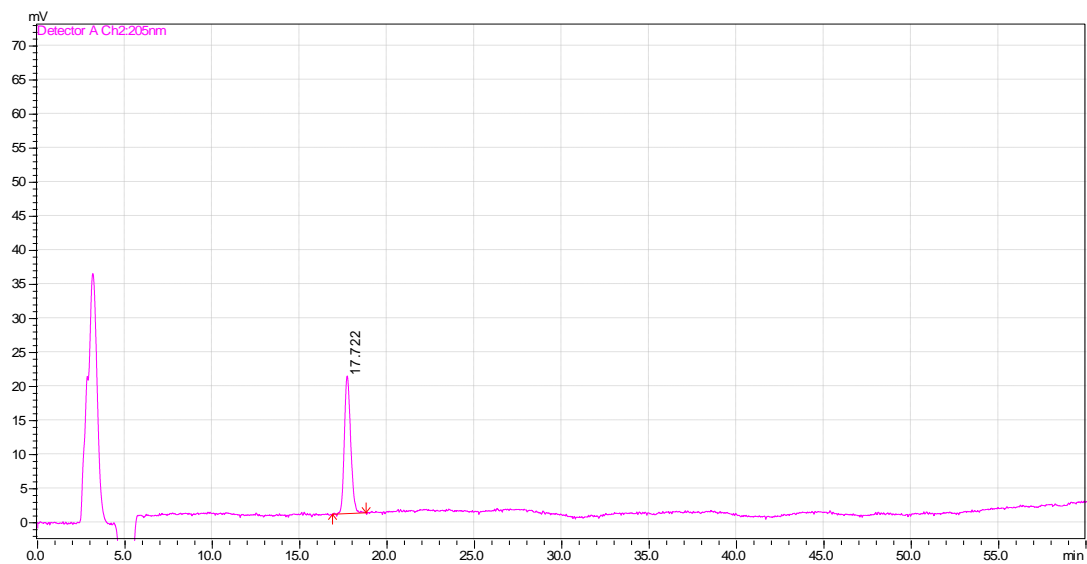

Ascestis Express, 15cm, 4.6mm, 2.7 micron; hexane/IPA :99.9/0.1, 0.75mL/min, 205nm

**2. HPLC chromatogram of chiral epoxide prepared using chiral salan ligand and Ti(IV) using HPLC analysis condition above**

**Reference:** Jat, J. L.; De, S. R.; Kumar, G.; Adebessin, A. M.; Gandham, S. K.; Falck, J. R., submitted for publication.

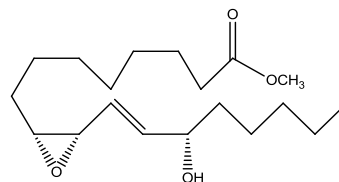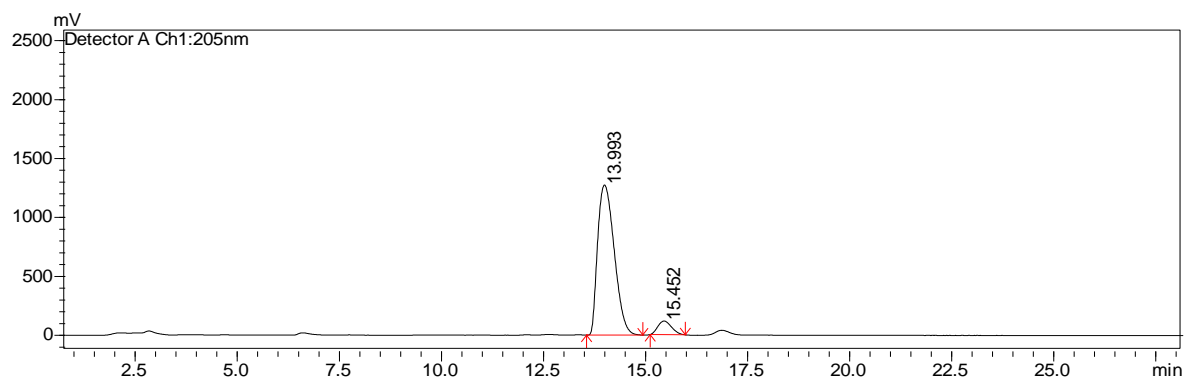

| Peak | Ret. Time | Area     | Height  | Area % |
|------|-----------|----------|---------|--------|
| 1.   | 13.993    | 36061338 | 1272814 | 93.039 |
| 2.   | 15.452    | 2698005  | 115438  | 6.961  |



**3. HPLC chromatogram of 1:1 mixture of chiral Ti(salan)-generated epoxide + commercial epoxide standard using HPLC analysis condition above.**

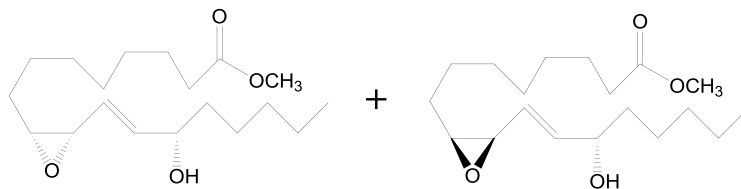

**(1:1 mixture of epoxides)**

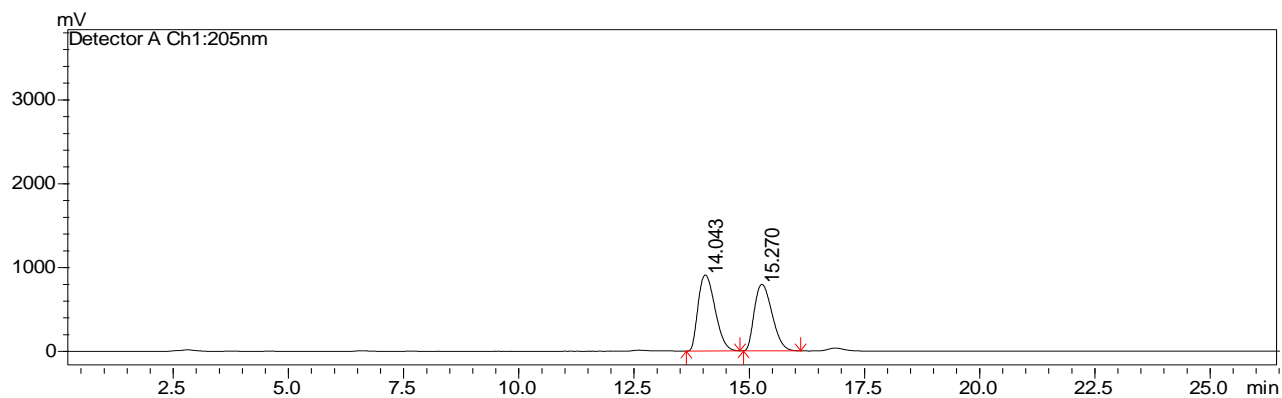

| Peak | Ret. Time | Area     | Height | Area % |
|------|-----------|----------|--------|--------|
| 1.   | 14.043    | 23200616 | 908224 | 52.162 |
| 2.   | 15.270    | 21276975 | 793732 | 47.838 |

4. HPLC chromatogram of epoxide 5a/6a from MTO-pyridine epoxidation using HPLC analysis condition above.

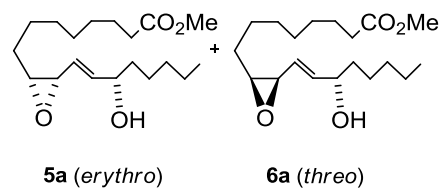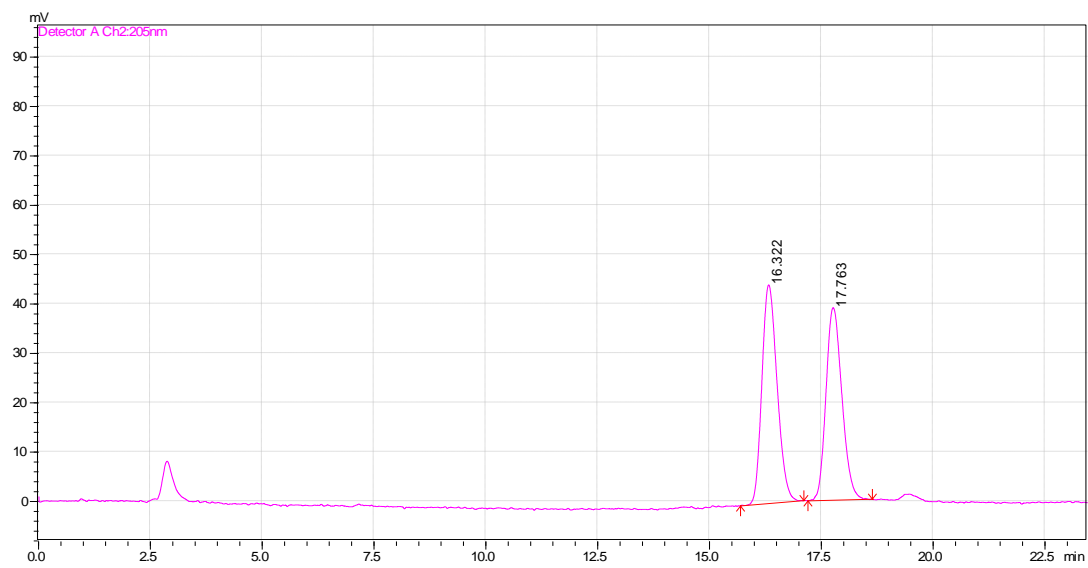

| Peak Table            |           |         |        |         |
|-----------------------|-----------|---------|--------|---------|
| Detector A Ch 2 205nm |           |         |        |         |
| Peak #                | Ret. Time | Area    | Height | Area %  |
| 1                     | 16.322    | 1050224 | 44308  | 52.0176 |
| 2                     | 17.763    | 968752  | 39023  | 47.9824 |

5. HPLC chromatogram of epoxide 5a/6a from MTO-pyridine epoxidation + commercial epoxide standard using HPLC analysis condition above.

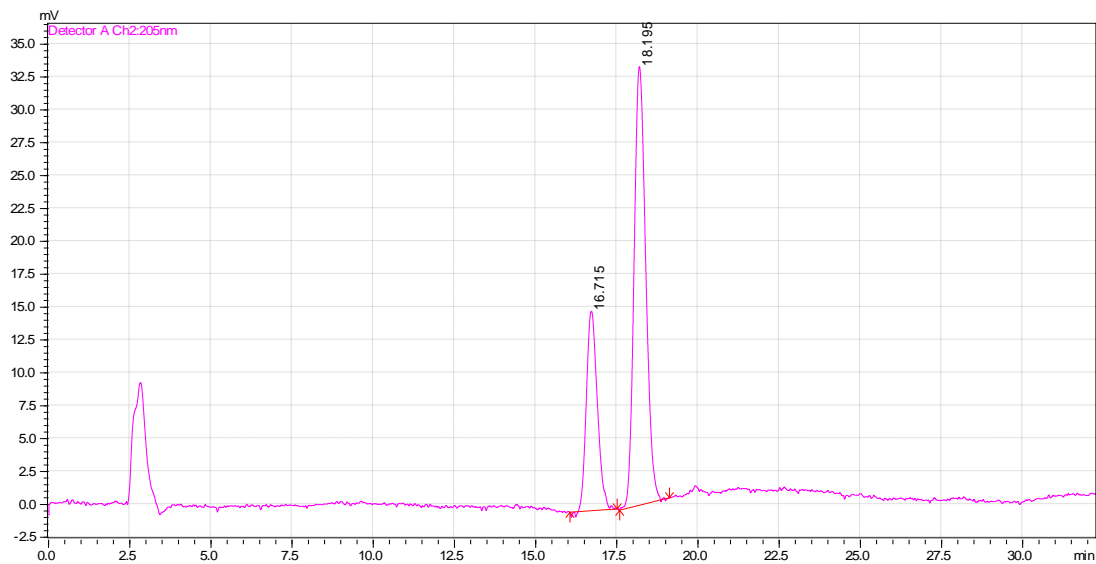

| Peak Table            |           |        |        |         |
|-----------------------|-----------|--------|--------|---------|
| Detector A Ch 2 205nm |           |        |        |         |
| Peak #                | Ret. Time | Area   | Height | Area %  |
| 1                     | 16.715    | 355843 | 15164  | 29.9270 |
| 2                     | 18.195    | 833193 | 33361  | 70.0730 |
